1  **$\gamma\delta$  T cells mediate a requisite portion of a**  
2 **wound healing response triggered by**  
3 **cutaneous poxvirus infection**

4  
5 Short Title:  $\gamma\delta$  T cells mediate wound healing after viral skin  
6 infection

7  
8 Irene E. Reider<sup>1</sup>, Eugene Lin<sup>1</sup>, Tracy E. Krouse<sup>1</sup>, Nikhil J.  
9 Parekh<sup>1</sup>, Amanda M. Nelson<sup>2</sup> and Christopher C. Norbury<sup>1\*</sup>,

10  
11 <sup>1</sup>Department of Microbiology and Immunology

12 <sup>2</sup>Department of Dermatology,  
13 Pennsylvania State University College of Medicine, Hershey, Pennsylvania, United States of  
14 America

15 \*Corresponding author

16 [ccn1@psu.edu](mailto:ccn1@psu.edu) (CCN)

17 **Abstract**

18 Infection at peripheral sites, such as the skin, activates local innate immune defenses  
19 tasked with limiting spread of the pathogen while preserving tissue integrity. T cells bearing  $\gamma\delta$  T  
20 Cell Receptors (TCR), which comprise multiple phenotypically distinct subtypes of cells, reside in  
21 normal skin, where they shape immunity to cutaneous infection, prior to onset of an adaptive  
22 immune response by conventional  $\alpha\beta$  CD4<sup>+</sup> (T<sub>CD4+</sub>) and CD8<sup>+</sup> (T<sub>CD8+</sub>) T cells. The mechanisms  
23 used by  $\gamma\delta$  T cells to control virus replication and tissue pathology following cutaneous infection  
24 are unknown, so we examined the role of  $\gamma\delta$  T cells in the response to cutaneous infection with  
25 vaccinia virus (VACV). Resident  $\gamma\delta$  T cells in the skin expanded and combined with recruited  $\gamma\delta$  T  
26 cells to control the pathology observed after cutaneous VACV infection. However, we observed  
27 no defect in control of local virus replication or increased systemic spread in mice lacking  $\gamma\delta$  T  
28 cells, despite induction of a cytolytic response in a specialized subset of resident  $\gamma\delta$  T cells. While  
29 examining  $\gamma\delta$  T cell-mediated control of tissue pathology following cutaneous VACV infection, we  
30 identified a unique wound healing signature associated with cutaneous virus infection that has  
31 features that are common to, but also features that antagonize, the sterile cutaneous wound  
32 healing response. Typically, tissue repair is thought to occur only after clearance of a pathogen,  
33 but the viral wound healing signature was evident prior to the peak of virus replication in the skin.  
34 Resident and recruited  $\gamma\delta$  T cells contributed to this wound healing signature through induction of  
35 multiple cytokines and growth factors required for efficient wound closure. Therefore,  $\gamma\delta$  T cells  
36 are early mediators of the wound healing response following cutaneous virus infection and are  
37 likely important in maintenance of skin barrier function and prevention of secondary bacterial  
38 infection.

39

40 **Author Summary**

41  $\gamma\delta$  T cells resident in the skin are among the first immune cell types positioned to be able  
42 to respond to a virus infection of the skin. Therefore, it was assumed that these cells in the skin  
43 play a role similar to their role after widespread infection throughout the body, namely to kill virus  
44 infected cells and slow virus replication and spread. However, we found no role for  $\gamma\delta$  T cells in  
45 control of virus replication after infection of the skin. Rather, the  $\gamma\delta$  T cells functioned as a critical  
46 component of a previously unrecognized wound healing response that is started early after virus  
47 infection of the skin, and occurs at the same time as the immune response that aims to clear the  
48 virus. This study is the first to describe both the early wound healing response after virus infection,  
49 and the role of  $\gamma\delta$  T cells in that response, and this information could allow manipulation of this  
50 response to decrease secondary bacterial infection and change scarring after virus skin  
51 infections.

## 52 Introduction

53 Skin resident  $\gamma\delta$  T cells are among the first dedicated effector immune cells to encounter  
54 a cutaneous virus infection, and have the potential to alter the course of the infection prior to the  
55 expansion and infiltration of conventional  $\alpha\beta$  T cells (both  $T_{CD4+}$  and  $T_{CD8+}$ ). Therefore, we sought  
56 to establish the role of skin resident and skin recruited  $\gamma\delta$  T cells upon control of a local cutaneous  
57 virus infection, along with their impact on systemic spread of the virus and the local pathology  
58 caused by the infection. Vaccinia virus (VACV) is an orthopoxvirus that was the most successful  
59 vaccine ever used (protecting against smallpox caused by variola virus) and now forms the basis  
60 for numerous clinical vaccine vectors. The efficacy of vaccination with VACV depends on  
61 cutaneous infection and damage [1]. There are numerous experimental and clinical indications  
62 that a cutaneous infection is the natural route of infection with VACV [2-4]. VACV is also related  
63 to both the skin-tropic orf virus, a prominent poxviral veterinary pathogen, and molluscum  
64 contagiosum, a poxvirus which infects tens of millions around the world and which can cause  
65 severe infections in immunocompromised patients [5, 6]. Thus, understanding the mechanisms  
66 and interactions between VACV and the host will provide insights about similar interactions  
67 between human and veterinary pathogens, and may identify therapeutic targets that allow  
68 manipulation of the host response, or which ameliorate pathology following infection. After  
69 systemic infection,  $\gamma\delta$  T cells exhibit cytolytic control over the replication and spread of VACV  
70 infection [7-10], but our previous work has identified key differences in how the immune system  
71 responds to control viruses after systemic infection versus the more relevant peripheral cutaneous  
72 infection. In particular, we have identified both cellular and molecular mechanisms that are  
73 induced following cutaneous VACV infection which act to control the extent of local pathology  
74 measured by lesion size and tissue loss, but which do not have large effects upon local VACV  
75 replication [11-13]. Therefore, we sought to examine the role of skin resident and skin recruited  
76  $\gamma\delta$  T cells after cutaneous VACV infection.

77           Adult murine skin contains  $\gamma\delta$  T cell subsets that reside in both the epidermis and dermis  
78 and are distinguished by the  $V\gamma$  TCR chain expression. Dendritic epidermal T cells (DETC)  
79 express the  $V\gamma3$  TCR chain (Garman and Raulet nomenclature [14]), whereas dermal  $\gamma\delta$  T cells  
80 express either  $V\gamma2$  or  $V\gamma4$  [15, 16]. Tissue resident cells in the skin reside among epithelial cells  
81 and are distinguished by expression of the epithelial cell adhesion molecule (Ep-CAM, CD326).  
82 In various skin pathologies  $\gamma\delta$  T cell subsets each have distinct functions, including production of  
83  $\text{IFN-}\gamma$  [17-21] or IL-17A [22-25], recruitment of myeloid cells [26, 27], lysis of virus infected cells  
84 [18, 28, 29] and pro-wound healing functions [26, 30-44]. Therefore, it is likely that each resident  
85  $\gamma\delta$  T cell type, along with recruited  $\gamma\delta$  T cells, has a differential ability to be activated, and  
86 correspondingly, a different function, following cutaneous VACV infection. In addition,  $\gamma\delta$  T cell  
87 phenotype and function are also influenced by the local microbiome [45], adding an additional  
88 wrinkle to any phenotype or function observed in uninfected or virus-infected skin.

89           In this study, we found that neither resident nor recruited  $\gamma\delta$  T cells are involved in the local  
90 control of VACV replication, or in the control of spread of VACV systemically, despite  $V\gamma3$  DETC  
91 displaying a cytolytic phenotype in response to cutaneous VACV infection. However, in the  
92 absence of  $\gamma\delta$  T cells, VACV infection induced a marked increase in tissue pathology over that  
93 observed in a WT situation. Neither tissue resident nor recruited  $\gamma\delta$  T cells appear to modulate  
94 any of the tissue protective functions (e.g., recruitment of myeloid cell populations, production of  
95 reactive oxygen species or Type I interferon) we have previously described as important during  
96 cutaneous VACV infection [11-13]. However, while investigating the mechanisms by which  $\gamma\delta$  T  
97 cells impact local tissue pathology we discovered induction of a unique wound healing signature  
98 induced early after VACV infection. This signature bears hallmarks of the classical wound healing  
99 response described after sterile wounding, but the viral wound healing response also displays  
100 some marked differences from the sterile response. Notably, this wound healing signature is  
101 induced early after virus infection, prior to the peak of virus replication in the skin, in contrast to

102 the accepted paradigm, in which wound healing begins only after virus clearance [46, 47]. Our  
103 data indicate that  $\gamma\delta$  T cells mediate a requisite component of this local viral wound healing  
104 response by producing, or inducing the production of, IL-17A, IL-22, IL-10, keratinocyte growth  
105 factor (KGF) and fibroblast growth factor 9 (FGF9). Therefore, the actions of  $\gamma\delta$  T cells are likely  
106 crucial in the closure of wounded skin following cutaneous virus infection, the prevention of  
107 secondary bacterial infections within the virus induced lesions, and the maintenance of the crucial  
108 barrier function of the skin.  
109

110 **Results**

111

112 ***Infected and uninfected  $\gamma\delta$  T cells in the skin are present in the foci of VACV infection and***  
113 ***expand early after infection.***

114 VACV is a widely-used vaccine vector, and dermal administration of the vaccine most  
115 effectively induces a protective adaptive immune response [1]. However, the major complications  
116 of immunization with VACV arise either from uncontrolled virus replication, or from uncontrolled  
117 inflammation at the site of infection. The immune cells that are present in the skin at the site of  
118 infection likely play a vital role in local control of virus replication or inflammation, or both, prior to  
119 the recruitment of innate and adaptive effector cells.  $\gamma\delta$  T cells reside in the dermis and epidermis  
120 of the skin [48], and mice lacking  $\gamma\delta$  T cells are deficient in control of systemic VACV infection [7-  
121 10] and other poxviruses [49-53]. To visualize the interaction of  $\gamma\delta$  T cells and VACV within the  
122 skin, we inoculated WT mice with VACV-GFP using a bifurcated needle, a method that both  
123 generates easily identifiable foci of infection, and mimics the route of human immunization with  
124 VACV. We harvested ear tissue 4d after infection and stained tissue sections for the presence of  
125 TCR $\delta$  using antibodies. By immunofluorescence microscopy, we observed significant numbers of  
126 TCR $\delta^+$   $\gamma\delta$  T cells that display typical dendritic morphology within the GFP $^+$  VACV lesion, as well  
127 as some cells localized along the boundaries of the lesions (**Fig. 1A**). No staining for TCR $\delta$  was  
128 seen in control TCR $\delta^{-/-}$  mice (**Fig. 1B**). Thus,  $\gamma\delta$  T cells are in a position to sense VACV infection,  
129 potentially lyse VACV-infected cells, and orchestrate the subsequent innate and adaptive immune  
130 response. VACV appeared to infect some  $\gamma\delta$  T cells within the infected foci. To confirm that VACV  
131 did infect  $\gamma\delta$  T cells in the skin, we infected mice intradermally with VACV, harvested ears on d4  
132 post-infection and analyzed  $\gamma\delta$  T cells by flow cytometry. This route of infection results in a  
133 localized infection in immunocompetent mice [3, 4]. We observed that a proportion (~11-15%) of

134  $\gamma\delta$  T cells in the ear expressed GFP after infection with VACV-GFP, indicating that these cells  
135 become infected with VACV (**Fig. 1C**).

136 To dissect  $\gamma\delta$  T cell responses in the skin following VACV infection, we stained single cell  
137 suspensions harvested from infected ears with antibodies to TCR $\delta$ , as well as with antibodies to  
138 conventional  $\alpha\beta$  T cells, and performed flow cytometry analysis using the gating strategy outlined  
139 in **Figure 1D**. As observed in a previous study [54], the numbers of  $\gamma\delta$  T cells increased early  
140 following infection (> 2-fold) and peaked at d2 post-infection (p.i.) (**Fig. 1E**). The expansion in  
141 number of  $\gamma\delta$  T cells appeared to represent an expansion or recruitment of all of the subsets of  
142 these cells. Notably,  $\gamma\delta$  T cells were the major lymphoid population in the VACV-infected ear until  
143 d4-5 p.i. (**Fig. 1E**), as NK cells are not recruited to the site of infection [11]. In addition,  
144 conventional T<sub>CD4+</sub> and T<sub>CD8+</sub> were recruited to the ear from the naïve precursor pool but did not  
145 surpass numbers of  $\gamma\delta$  T cells until at least d5 post-infection (**Fig. 1E**). Indeed, although numerous  
146 studies have examined the T<sub>CD8+</sub> response to VACV following infection of the skin [55, 56], these  
147 cells were in the minority compared to T<sub>CD4+</sub> cells, which accumulate with similar kinetics and  
148 persist for much longer following infection (**Fig. 1E**).

149 To further define the  $\gamma\delta$  T cell populations in infected and uninfected skin, we quantified  
150 the numbers of V $\gamma$ 3<sup>+</sup> DETCs [14] and V $\gamma$ 2<sup>+</sup> dermal  $\gamma\delta$  T cells [15, 16] or V $\gamma$ 3<sup>-</sup>V $\gamma$ 2<sup>-</sup>  $\gamma\delta$  T cells. After  
151 VACV infection, staining with antibodies to V $\gamma$ 3 and V $\gamma$ 2 TCR chains revealed that DETC, which  
152 were consistently more abundant than other  $\gamma\delta$  T cell subsets, nearly doubled in number by d2  
153 p.i., and then underwent a drastic contraction before recovering following resolution of infection  
154 (**Fig. 1F**). In contrast, V $\gamma$ 2<sup>+</sup> dermal  $\gamma\delta$  T cell numbers peaked somewhat later around d4 p.i., but  
155 underwent a slow, gradual contraction (**Fig. 1F**). On the other hand, the more abundant V $\gamma$ 2<sup>-</sup>V $\gamma$ 3<sup>-</sup>  
156 dermal  $\gamma\delta$  T cell population, which likely expresses the V $\gamma$ 4 chain [16], displayed similar patterns  
157 of expansion, contraction, and recovery as DETCs (**Fig. 1F**). The distinct expansion and



158 recruitment kinetics of  $\gamma\delta$  T cell populations suggests that each population may have a distinct  
159 function and role that contributes to the overall successful host response to viral infection.

160

161 ***A distinct  $\gamma\delta$  T cell subset displays cytolytic function after VACV infection, but does not***  
162 ***control local virus replication or systemic spread.***

163  $\gamma\delta$  T cells exhibit a variety of functions depending on the subtype, the stage of life at which  
164 they develop, and sub-anatomical location [57]. As  $\gamma\delta$  T cells have previously been proposed to  
165 mediate antiviral immunity via cytolytic activity [18, 28, 29], we initially examined the ability of  $\gamma\delta$   
166 T cell subsets ( $V\gamma 3^+$  DETC,  $V\gamma 2^+$  dermal  $\gamma\delta$  T cells or  $V\gamma 3^-V\gamma 2^-$   $\gamma\delta$  T cells), conventional  $T_{CD8^+}$  or  
167  $T_{CD4^+}$  to degranulate in response to a broad activation signal, PMA/ionomycin treatment (**Fig. 2A**).  
168 Degranulation, measured via cell-surface expression of the endosomal marker CD107a in  
169 response to PMA/ionomycin, was measured on d4 and d8 post-infection, except in  $T_{CD8^+}$ , which  
170 were only present in the VACV-infected ear at d8 post-infection. We found minor cell surface  
171 staining with an anti-CD107a antibody after PMA/ionomycin treatment in  $T_{CD4^+}$  and  $V\gamma 3^+$  DETC  
172 on d8 post-infection, but a marked activation-induced degranulation by the majority of  $V\gamma 3^+$  DETC  
173 4 days after VACV infection (**Fig. 2A**). We saw only background levels of CD107a staining in the  
174 other cell types examined, either with or without of PMA/ionomycin activation. Effective cytotoxicity  
175 of virus-infected cells often requires the secretion of serine proteases, such as granzyme B (GzB),  
176 during degranulation [58]. Therefore, we also examined intracellular expression of GzB by  $V\gamma 3^+$   
177 DETC,  $V\gamma 2^+$  dermal  $\gamma\delta$  T cells or  $V\gamma 3^-V\gamma 2^-$   $\gamma\delta$  T cells, as well as by conventional  $T_{CD8^+}$  or  $T_{CD4^+}$ , as  
178 above (**Fig. 2B**). On d8 post-infection, approximately one-third of  $V\gamma 3^+$  DETC, about one-half of  
179  $T_{CD4^+}$  and almost all of the  $T_{CD8^+}$  expressed GzB, indicating they likely display cytolytic activity  
180 against VACV-infected cells (**Fig. 2B**). Earlier after infection, at d4, a similar proportion of about  
181 one-third of  $V\gamma 3^+$  DETC expressed GzB, and a small number of  $T_{CD4^+}$  also had cytolytic capability  
182 (**Fig. 2B**). However, the majority of  $\gamma\delta$  T cells did not express GzB (**Fig. 2B**). Taken together,

183 these data indicate that, of the  $\gamma\delta$  T cells present, only  $V\gamma 3^+$  DETC likely have the capability to  
184 directly kill VACV-infected cells in the ear.

185 The observation that DETC possess cytolytic activity after VACV infection drove us to  
186 examine whether  $\gamma\delta$  T cells play a direct antiviral role following cutaneous infection, as proposed  
187 previously following systemic infection [7-10]. We examined VACV titers in the ear of WT and  
188  $TCR\delta^{-/-}$  mice, which lack  $\gamma\delta$  T cells, at d5 post-infection (**Fig. 2C**), a time point corresponding to  
189 the peak of virus replication [11] and at d8 post-infection (**Fig. 2D**), a time point before tissue loss  
190 occurs. VACV titers in the ear in  $TCR\delta^{-/-}$  versus WT mice displayed only small (~1.5 fold)  
191 differences (**Fig. 2C, D**), indicating that  $\gamma\delta$  T cells do not directly or indirectly contribute significantly  
192 to the control of local cutaneous VACV replication.

193 A major function of the initial immune response to a peripheral virus infection is to contain  
194 the infection at the initial site, prior to recruitment of innate and adaptive effector cells which then  
195 mediate clearance of the infection. Dermal VACV infection remains primarily localized to the ear  
196 following infection [3], but removal of various immune components can allow systemic spread to  
197 the primary site of VACV replication, the ovaries [12]. However, we found no significant spread  
198 of VACV to the ovaries of  $TCR\delta^{-/-}$  mice, indicating that  $\gamma\delta$  T cells are not likely to play a critical role  
199 in restricting systemic spread of VACV (**Fig. 2C, D**). Therefore,  $\gamma\delta$  T cells are not required to  
200 control local VACV replication, or systemic spread of VACV.

201 Mice infected in the ears with VACV develop visible lesions that undergo necrosis and the  
202 necrotic tissue is then lost [3, 4]. We have previously described a role for two recruited populations  
203 of monocytes, production of reactive oxygen species and local Type I IFN production in control of  
204 the severity of pathology observed following dermal VACV infection [11-13]. However, none of  
205 the factors mentioned above are involved in control of local VACV replication or spread from the  
206 original site of infection. Therefore, we sought to examine whether  $\gamma\delta$  T cells in the skin may play  
207 a similar role in controlling the severity of pathology following VACV infection, without displaying

208 a role in control over local VACV replication. By measuring tissue swelling, the dimensions of the  
209 lesions and ensuing tissue loss in WT and TCR $\delta^{-/-}$  mice, we assessed the extent of tissue damage  
210 following VACV infection. TCR $\delta^{-/-}$  mice exhibited no change in swelling of VACV-infected ear  
211 tissue in the 6 days following the initial infection when compared to that observed in WT mice  
212 (**Fig. 2E**). However, TCR $\delta^{-/-}$  mice subsequently displayed visibly larger skin lesions than their  
213 VACV-infected WT counterparts on d8 post-infection (**Fig. 2 F, G**) and this was quantified to  
214 indicate a statistically significant change in lesion size from d6-14 post-infection (**Fig. 2H**).  
215 Correspondingly, there was also a visible and quantifiable acceleration and increase in severity  
216 of tissue loss in TCR $\delta^{-/-}$  mice compared to their WT counterparts (**Fig. 2 I-K**). Taken together,  
217 these data indicate that  $\gamma\delta$  T cells control the severity and progression of tissue pathology at the  
218 cutaneous site of VACV infection without playing a role in the control of local VACV replication.

219

### 220 *$\gamma\delta$ T cell responses to VACV do not influence the local or systemic T<sub>CD8+</sub> response to VACV.*

221 The observation that  $\gamma\delta$  T cells do not control VACV replication or spread, but do  
222 ameliorate exacerbated tissue loss following VACV infection, suggested that an overly zealous  
223 local immune host response in the absence of  $\gamma\delta$  T cells could cause an increase in local necrosis  
224 in the absence of an increase in VACV replication. Such an observation would indicate an  
225 immunoregulatory or immunosuppressive role for  $\gamma\delta$  T cells. To test this we examined the effect of  
226  $\gamma\delta$  T cells upon multiple components of the cutaneous immune response following VACV infection.  
227 T<sub>CD8+</sub> are a vital component of antiviral immunity that are recruited to the VACV-infected ear (**Fig.**  
228 **1E**) and localize around the periphery of the VACV lesion, thus preventing spread of the virus 4d  
229 after infection [12, 55, 59]. Therefore, we sought to examine a potential role for  $\gamma\delta$  T cells in the  
230 priming, recruitment, localization or subsequent function of T<sub>CD8+</sub> in the anti-VACV response. We  
231 found no differences in the numbers of T<sub>CD8+</sub> recruited to the ear either 5d (**Fig. 3A**) or 8d (**Fig.**  
232 **3B**) after cutaneous VACV infection of WT or TCR $\delta^{-/-}$  mice. We then examined the localization of

233  $T_{CD8+}$  relative to VACV-infected cells after VACV-GFP infection of WT or  $TCR\delta^{-/-}$  mice (**Fig. 3C,**  
234 **D**). In both sets of mice we observed  $T_{CD8+}$  around the periphery of the VACV lesion (**Fig. 3C, D**),  
235 indicating that there was no defect in  $T_{CD8+}$  localization in the absence of  $\gamma\delta$  T cells. Next, we  
236 examined the production of  $IFN-\gamma$  and  $TNF\alpha$  by  $T_{CD8+}$  in the VACV-infected ears of both mouse  
237 strains on d5 (**Fig. 3E**) or d8 (**Fig. 3F**) post-infection. We found, on both d5 and d8 post-infection,  
238 that cytokine production by  $T_{CD8+}$  directly *ex vivo* was indistinguishable in WT vs.  $TCR\delta^{-/-}$  mice  
239 (**Fig. 3E, F**). These data suggest there is no overarching defect in the function of  $T_{CD8+}$  in the  
240 absence of  $\gamma\delta$  T cells.

241 To this point we have examined the recruitment, localization and function of bulk  $T_{CD8+}$ . It  
242 was possible that the study of bulk  $T_{CD8+}$  of many specificities obscured subtle changes in some  
243 antigen-specific  $T_{CD8+}$  populations. However, it was not possible to examine the function of  
244 antigen-specific  $T_{CD8+}$  at the site of infection, as many cells had already been activated in the  
245 presence of VACV-infected cells (**Fig. 3E, F**). Therefore, we examined the antigen-specific  
246 systemic  $T_{CD8+}$  response in the spleen 8d after dermal VACV infection of WT or  $TCR\delta^{-/-}$  mice by  
247 incubating splenocytes in the presence of 9 individual MHC Class I-binding peptides derived from  
248 VACV. We measured production of  $IFN-\gamma$  and  $TNF\alpha$ , each of which can exert antiviral effects and  
249 which, when both produced by the same cells, indicate polyfunctionality that correlates with  
250 protective capacity against virus infection [60]. The proportion of  $T_{CD8+}$  producing  $IFN-\gamma$  in  
251 response to each epitope was greater than the proportion producing  $TNF\alpha$ , but, across three  
252 replicate experiments, there were no statistically significant differences in the responses observed  
253 in WT and  $TCR\delta^{-/-}$  mice. Taken together, these results indicate that  $\gamma\delta$  T cells are unlikely to play  
254 a significant role in the priming, recruitment, localization or subsequent function of  $T_{CD8+}$  in the  
255 anti-VACV response. Therefore,  $T_{CD8+}$ -mediated immunopathology is unlikely to contribute to the  
256 increased pathology we observe in VACV-infected  $TCR\delta^{-/-}$  mice.

257

258  ***$\gamma\delta$  T cells do not influence the local monocyte response to VACV.***

259           It is possible that, rather than controlling immunopathology,  $\gamma\delta$  T cells coordinate the  
260 changes in the immune response that lead to resolution of inflammation and subsequent reduction  
261 of local tissue pathology. We have previously described a role for two recruited populations of  
262 monocytes in control of the severity of pathology observed following dermal VACV infection but  
263 these populations of monocytes do not have a large effect upon local VACV replication [11-13].  
264 Both classical CD11b<sup>+</sup>Ly6C<sup>+</sup>Ly6G<sup>-</sup> monocytes and a population of CD11b<sup>+</sup>Ly6C<sup>+</sup>Ly6G<sup>+</sup> myeloid  
265 cells are recruited to the VACV lesion following i.d. infection [11, 12, 61]. The CD11b<sup>+</sup>Ly6C<sup>+</sup>Ly6G<sup>+</sup>  
266 myeloid cells are monocytic in nature and limit local tissue damage via production of reactive  
267 oxygen species [11]. In contrast, the classical CD11b<sup>+</sup>Ly6C<sup>+</sup>Ly6G<sup>-</sup> monocytes are attracted to the  
268 site of infection by Type I IFN-stimulated production of CCL4, and also moderate tissue damage,  
269 possibly by becoming infected and soaking up excess virions [13]. Since  $\gamma\delta$  T cells are found in  
270 the VACV lesion (**Fig. 1**), and are known to regulate myeloid cell activity after some insults [26,  
271 27], we examined whether sensing of VACV by  $\gamma\delta$  T cells is required to moderate recruitment of  
272 either monocyte population. We harvested ears from infected WT or TCR $\delta^{-/-}$  mice, and carefully  
273 gated monocyte populations to exclude innate lymphoid cells (ILCs), lymphocytes or resident or  
274 recruited dendritic cells (DC) (**Fig. 4A**). Five days after infection, a time point at which both virus  
275 replication and CD11b<sup>+</sup>Ly6C<sup>+</sup>Ly6G<sup>-</sup> classical monocyte infiltration peak, there was no difference  
276 in recruitment of either classical monocytes (**Fig. 4B, C**) or CD11b<sup>+</sup>Ly6C<sup>+</sup>Ly6G<sup>+</sup> myeloid cells  
277 (**Fig. 4B, E**) in VACV-infected WT compared to infected TCR $\delta^{-/-}$  mice. Eight days after infection,  
278 when numbers of CD11b<sup>+</sup>Ly6C<sup>+</sup>Ly6G<sup>+</sup> myeloid cells peak, we also observed no difference in  
279 recruitment of either classical monocytes (**Fig. 4D**) or CD11b<sup>+</sup>Ly6C<sup>+</sup>Ly6G<sup>+</sup> myeloid cells (**Fig. 4F**)  
280 in VACV-infected WT compared to infected TCR $\delta^{-/-}$  mice. In contrast to T<sub>CD8+</sub>, both  
281 CD11b<sup>+</sup>Ly6C<sup>+</sup>Ly6G<sup>-</sup> monocytes and CD11b<sup>+</sup>Ly6C<sup>+</sup>Ly6G<sup>+</sup> myeloid cells enter the VACV lesion,  
282 where the CD11b<sup>+</sup>Ly6C<sup>+</sup>Ly6G<sup>-</sup> monocytes become infected, and CD11b<sup>+</sup>Ly6C<sup>+</sup>Ly6G<sup>+</sup> myeloid

283 cells produce ROS to moderate tissue damage [11, 59]. To examine whether  $\gamma\delta$  T cells control  
284 the localization of each myeloid cell population, we infected WT or TCR $\delta^{-/-}$  mice with VACV-GFP  
285 and harvested on d7 post-infection, and then stained for either Ly6C or Ly6G. We observed similar  
286 staining with Ly6C and Ly6G, both inside and outside of the GFP<sup>+</sup> VACV lesion, in both WT or  
287 TCR $\delta^{-/-}$  mice. Therefore, our data indicate that  $\gamma\delta$  T cells do not play a requisite role in recruitment  
288 or localization of three crucial components of local cellular antiviral immunity.

289

### 290 ***IFN- $\gamma$ mediates pathology in VACV-infected skin***

291 Interferons are potent antiviral cytokines that are widely produced upon virus infection, but  
292 which are also strongly linked to the pathology of many skin conditions, including psoriasis [62]  
293 and alopecia areata [63]. We have demonstrated above that IFN- $\gamma$  is produced by T<sub>CD8+</sub> in  
294 response to cutaneous VACV infection, but that this process is not affected by the absence of  $\gamma\delta$   
295 T cells (**Fig. 3 A-H**). However, direct production of IFN- $\gamma$  by  $\gamma\delta$  T cells plays a role in control of  
296 multiple viral infections [17-21], including poxviruses following systemic infection [8, 50, 51, 64].  
297 Therefore, we examined the level of mRNA encoding IFN- $\gamma$  in the VACV-infected ear at various  
298 times after infection. We found a robust (~40-fold) and reproducible induction of *ifng* transcript by  
299 3 days post-infection (**Fig. 5A**), a time point at which we have previously described there was little  
300 to no immune cell infiltrate present [11]. The induction of *ifng* transcript continued to rise to ~1-  
301 2000 fold within 7 days of infection, likely as a result of infiltration of activated T<sub>CD8+</sub> and T<sub>CD4+</sub>  
302 (**Fig. 5A**).

303 To examine the functional consequence of production of IFN- $\gamma$  following cutaneous VACV  
304 infection, we measured the swelling of the VACV infected ear at early time points in WT vs. IFN-  
305  $\gamma$ R $^{-/-}$  mice. We found that, as early as d3 post-infection, VACV-infected IFN- $\gamma$ R $^{-/-}$  mice displayed  
306 increased swelling compared to WT mice (**Fig. 5B**). This correlated with development of a VACV  
307 lesion 1d earlier in VACV-infected IFN- $\gamma$ R $^{-/-}$  vs. WT mice (**Fig. 5C-E**) and enhanced tissue loss at

308 later time points (**Fig. 5F-H**). IFN- $\gamma$  is a potent antiviral cytokine that drives production of many  
309 interferon stimulated genes that act to control virus replication using a large variety of  
310 mechanisms. However, the increased local tissue pathology we observed was not a result of  
311 enhanced VACV replication in the absence of the antiviral action of IFN- $\gamma$ , as WT and IFN- $\gamma$ R<sup>-/-</sup>  
312 mice displayed similar levels of replicating VACV in the ear at d5 post-infection (**Fig. 5I**). In  
313 addition, the absence of IFN- $\gamma$  signaling did not alter spread of VACV from the ear, with similar  
314 low levels disseminating to spleen and ovaries by d5 post-infection (**Fig. 5 J,K**). Therefore, the  
315 phenotype we observe following VACV infection of IFN- $\gamma$ R<sup>-/-</sup> mice, namely a marked increase in  
316 tissue pathology compared to VACV-infected WT mice, without a corresponding increase in  
317 VACV replication or spread, closely mimics the phenotype we observed following VACV infection  
318 of TCR $\delta$ <sup>-/-</sup> mice.

319 To tease out the role of  $\gamma\delta$  T cell-mediated production of IFN- $\gamma$  we examined the production  
320 of IFN- $\gamma$  on d4 post-infection by staining for the intracellular cytokine, with or without activation of  
321 *ex vivo* isolated  $\gamma\delta$  T cell subsets by PMA/ionomycin. Somewhat surprisingly, *ex vivo* isolated  $\gamma\delta$   
322 T cells of all kinds examined failed to stain for IFN- $\gamma$ , even when activated with PMA-ionomycin  
323 for a number of hours before staining (**Fig. 5L**). As a control for our activation and staining, we  
324 examined IFN- $\gamma$  production by T<sub>CD4+</sub> and T<sub>CD8+</sub> harvested from the lymph node of VACV infected  
325 mice on d4 post-infection, a time point prior to infiltration of these cell types to the site of infection  
326 (**Fig. 5M**). Although neither T<sub>CD4+</sub> nor T<sub>CD8+</sub> detectably produced IFN- $\gamma$  in the absence of external  
327 stimuli, there was substantial and reproducible upregulation upon PMA/ionomycin stimulation  
328 (**Fig. 5M**), indicating that our assay was working.

329 Our observation that we could detect both *ifng* transcript (**Fig. 5A**) and an increase in  
330 swelling in IFN- $\gamma$ R<sup>-/-</sup> mice (**Fig. 5B**), but no detectable production of IFN- $\gamma$  protein by cutaneous  $\gamma\delta$   
331 T cells (**Fig. 5J**) at similar time points could potentially be explained by the relative insensitivity of  
332 the flow cytometry staining for IFN- $\gamma$  protein. Therefore, we examined the levels of *ifng* transcript

333 in the ears of WT vs. TCR $\delta^{-/-}$  mice on d4 post-infection, the day on which we had previously  
334 conducted the flow cytometry analysis. As above, we found a marked induction of *ifng* transcript  
335 upon VACV infection of WT mice and this was enhanced slightly (~2-fold) in the absence of  $\gamma\delta$  T  
336 cells (**Fig. 5N**). Therefore,  $\gamma\delta$  T cells do not contribute to IFN- $\gamma$  production upon cutaneous VACV  
337 infection, a marked departure from their role following systemic infection [8, 50, 51, 64].

338         Because  $\gamma\delta$  T cells are not required for IFN- $\gamma$  production, and leukocytes are not recruited  
339 to the infected ear until after we began to observe induction of *ifng* transcript, we sought to identify  
340 the cell type producing IFN- $\gamma$  early after dermal VACV infection. We infected mice, harvested cells  
341 from the ear on d4 post-infection and incubated them in the presence of Brefeldin A for 6h to  
342 prevent protein secretion, stained cells with cell-surface markers to identify cell types, and then  
343 intracellularly for IFN- $\gamma$ . We divided cells in the ear into EpCAM $^{-}$  CD45 $^{+}$  infiltrating immune cells,  
344 EpCAM $^{+}$  CD45 $^{+}$  resident immune cell populations (which include resident  $\gamma\delta$  T cells) and EpCAM $^{+}$   
345 CD45 $^{-}$  keratinocytes (KC). As in all of our flow cytometry experiments, we used fluorescence  
346 minus one (FMO) controls, in which cells were stained with all antibodies except to IFN- $\gamma$ , in order  
347 to distinguish our IFN- $\gamma$  signal. We found that neither EpCAM $^{-}$  CD45 $^{+}$  nor EpCAM $^{+}$  CD45 $^{+}$   
348 (including resident  $\gamma\delta$  T) cells stained for the presence of IFN- $\gamma$  on d4 post-infection (**Fig. 5O, P**).  
349 However, somewhat surprisingly, a small proportion of EpCAM $^{+}$  CD45 $^{-}$  KC, which comprise the  
350 majority of cells in the ear, did produce IFN- $\gamma$  (**Fig. 5O, P**). Although the proportion of KC producing  
351 IFN- $\gamma$  only increased from <0.1% of cells to ~0.54+/- 0.07 of cells, KC outnumber all resident and  
352 recruited cells in the skin >100:1, so this increase in the number of cells is very biologically  
353 significant.

354

### 355 ***$\gamma\delta$ T cell subsets are responsible for IL-17 production in VACV-infected skin***

356         After we had shown that  $\gamma\delta$  T cells did not produce IFN- $\gamma$  after cutaneous VACV infection  
357 our attention turned to examine the production of other cytokines that have been implicated in



358 skin pathology. In particular, our attention turned to the  $\gamma\delta$  T cell-mediated production of IL-17A  
359 for a number of reasons. First, there is a strict division between the production of IL-17A and  
360 IFN- $\gamma$  by  $\gamma\delta$  T cells [65], that may be controlled by the initiation of innate vs. adaptive signaling  
361 within these cells [21]. Second,  $\gamma\delta$  T cells are the primary producers of IL-17 outside of gut tissue  
362 [22, 23], including in cutaneous infection models.  $V\gamma 2^+$  dermal  $\gamma\delta$  T cells are strong producers of  
363 IL-17A following BCG infection [66] and  $V\gamma 3^+$  DETCs produced IL-17A after cutaneous *S. aureus*  
364 infection, [24, 25]. Third,  $\gamma\delta$  T cell-mediated production of IL-17A can also play a role in cutaneous  
365 pathology, driving tissue damage in psoriasis [16, 67, 68] and dermatitis [69]. Fourth,  $\gamma\delta$  T cell-  
366 mediated production of IL-17A can also play an important role in cutaneous wound healing [24].  
367 Therefore, as  $\gamma\delta$  T cell-derived IL-17A clearly plays important roles in context-dependent anti-  
368 pathogen, as well as tissue damaging and tissue protective responses, we examined the levels  
369 of *il17a* mRNA transcript upon cutaneous VACV infection. There was a marked (~10-15-fold)  
370 increase in *il17a* transcript in WT mice upon VACV infection (**Fig. 6A**). When we examined levels  
371 of IL-17A protein produced in  $\gamma\delta$  TCR<sup>+</sup> or  $\gamma\delta$  TCR<sup>-</sup> cell populations by flow cytometry, using  
372 approaches similar to those outlined above, we found that >80% of the cells producing IL-17A  
373 were  $\gamma\delta$  T cells (**Fig. 6B**) early after infection. We further examined the ability of  $\gamma\delta$  T cell subsets  
374 ( $V\gamma 3^+$  DETC,  $V\gamma 2^+$  dermal  $\gamma\delta$  T cells or  $V\gamma 3^-V\gamma 2^-$   $\gamma\delta$  T cells), to produce IL-17A directly *ex vivo*, or  
375 whether they possessed the ability to produce IL-17A following activation with PMA/ionomycin.  
376 A small proportion of both the  $V\gamma 2^+$  dermal  $\gamma\delta$  T cells and  $V\gamma 3^-V\gamma 2^-$   $\gamma\delta$  T cells produced low  
377 quantities of IL-17A directly *ex vivo* (**Fig. 6C, D**), and this production was enhanced by activation  
378 with PMA-ionomycin (**Fig. 6C**). However, the  $V\gamma 3^+$  DETC, which were the cells responding to  
379 VACV infection by upregulating cytolytic activity, did not produce IL-17A (**Fig. 6C, D**), further  
380 indicating functional specialization of  $\gamma\delta$  T cell subsets upon dermal VACV infection. To assess  
381 the contribution of  $V\gamma 2^+$  and  $V\gamma 3^-V\gamma 2^-$   $\gamma\delta$  T cells to the production of IL-17A following VACV  
382 infection, we measured transcript levels of *il17a* mRNA in uninfected or infected WT or TCR $\delta^{-/-}$

383 mice, 5 days after infection. The increase in *il17a* transcript in WT mice infected by VACV was  
384 almost completely ablated in VACV-infected TCR $\delta^{-/-}$  mice (**Fig. 6E**), indicating that  $\gamma\delta$  T cells,  
385 directly or indirectly, are responsible for almost all IL-17A production upon virus infection.

386

### 387 ***Dermal VACV infection induces a response characteristic of wound healing***

388 Our data to this point indicated that both  $\gamma\delta$  T cells and IFN- $\gamma$  can have a profound impact  
389 upon local tissue pathology following VACV infection, without a large effect upon local VACV  
390 replication or systemic spread of the virus. This phenotype is reminiscent of those we have  
391 observed in mice depleted of either of two different monocyte populations [11, 61], which lack  
392 myeloid cell production of reactive oxygen species [11], or mice lacking Type I IFN signaling [13].  
393 Therefore, we took a step back to examine the processes induced at the site of dermal infection  
394 with VACV. We assessed the expression of various cytokines, chemokines, interferons, interferon  
395 receptors and their signaling pathways in the skin of uninfected WT mice compared to VACV-  
396 infected WT mice on d5 post-infection, a time point immediately prior to the development of  
397 lesions and subsequent tissue loss. This analysis did not directly address the role of  $\gamma\delta$  T cells,  
398 as we only examined modulation of gene expression by VACV infection in WT mice, but it did  
399 provide us with significant information with which to interrogate the role of  $\gamma\delta$  T cells (see below).  
400 In total, our gene profiling examined the expression of 160 unique transcripts 72 of which (45%)  
401 were statistically changed more than 2-fold (50 upregulated, 22 downregulated) upon VACV  
402 infection (**Fig. 7A**) Our focused approach allowed us to identify that ~76-77% of the 50  
403 upregulated and 22 downregulated transcripts had a defined role in the process of cutaneous  
404 wound healing (upregulated wound healing genes in red and downregulated wound healing genes  
405 in blue in **Fig. 7A**) [70-72], producing a putative gene signature for a virus induced-wound healing  
406 response in skin, shortly after infection.

407 Of the transcripts that were modulated by VACV infection, and have a role in cutaneous  
408 wound healing, were CC chemokines (**Fig. 7B**) and CXC chemokines (not shown), which function  
409 to recruit innate and adaptive immune effector cells, and all of which were upregulated. There  
410 were also marked upregulations of IL-10 superfamily members, including *il10*, *il22* and *il24* (which  
411 was upregulated ~400-fold), and downregulation of the antagonist of the IL-10 superfamily  
412 member IL-20, *il20ra* (**Fig. 7C**). Transcripts for other cytokines with a positive role in wound  
413 healing, such as *il1b*, *il6* and *il9*, were upregulated, while cytokines that have an inhibitory role in  
414 wound healing, such as *il16* and *il4ra*, were downregulated upon VACV infection (**Fig. 7D**).

415 Growth factors such as vascular endothelial growth factor (*vegf*), Leukemia inhibitory  
416 factor (*lif*), and osteopontin (*spp1*) were also upregulated by VACV infection (**Fig. 7E**). Somewhat  
417 surprisingly, transcripts of receptors for a number of growth factors involved in wound healing,  
418 including the growth hormone (*ghr*), leptin (*lepr*) and erythropoietin (*epor*) receptors, were  
419 downregulated in response to VACV infection, along with the hormones thrombopoietin (*thpo*)  
420 and adiponectin (*adipoq*) (**Fig. 7A**). This indicates that the presence of VACV infection in the skin  
421 may modulate the classical wound healing response, creating a unique poxvirus/wound healing  
422 signature. In addition, members of the Transforming Growth Factor- $\beta$  superfamily (*tgfb2*, *bmp2*,  
423 *bmp4* and *bmp6*) that play a role in fibrosis and scar formation in the classical wound healing  
424 response [73, 74], were also downregulated upon VACV infection (**Fig. 7F**), further indicating a  
425 departure from the classical response.

426

#### 427 ***$\gamma\delta$ T cells modulate expression of genes involved in wound healing after VACV infection.***

428 We expanded on our findings to examine the impact of a constitutive deficiency in  $\gamma\delta$  T  
429 cells upon the expression of cytokines and chemokines identified above as being involved in the  
430 wound healing process initiated by dermal VACV infection. As above, we utilized qPCR arrays to  
431 profile gene expression of day 5 post-infection. Importantly, in order to rule out any contribution

432 of constitutive changes in gene expression in TCR $\delta^{-/-}$  mice, we initially analyzed gene expression  
433 in these mice compared to WT mice, in the absence of infection. We found that a number of  
434 transcripts were upregulated in uninfected mice in the absence of  $\gamma\delta$  T cells, including *cxcl13*,  
435 *il23a* and *il12b* (**Fig. 8A**). We also found that *adipoq* and *il16*, which are genes involved in wound  
436 healing that we have previously shown to be modulated during VACV infection, were constitutively  
437 downregulated in the skin of TCR $\delta^{-/-}$  mice, implying that a constitutive alteration in wound healing  
438 may exist in these mice (**Fig. 8A**). However, as we observed a change in *adipoq* and *il16* in the  
439 absence of infection in TCR $\delta^{-/-}$  mice, we could not draw any conclusions about the role of these  
440 genes in the response after VACV infection. We next examined changes in gene expression in  
441 uninfected vs. infected TCR $\delta^{-/-}$  mice to reveal VACV-induced changes in gene expression in these  
442 mice. We found a similar pattern of gene expression changes to that shown in Fig. 7A, with both  
443 upregulation and downregulation of numerous cytokines and chemokines, some of which are  
444 involved in wound healing (upregulated wound healing genes in red and downregulated wound  
445 healing genes in blue in **Fig. 8B**). Therefore, to examine the contribution of  $\gamma\delta$  T cells to gene  
446 expression exclusively after VACV infection, we compared gene expression in WT vs TCR $\delta^{-/-}$   
447 mice 5 days after dermal VACV infection, a time point at which there is no significant difference  
448 in titers of VACV within the infected ear (**Fig. 2D**). We found that a number of transcripts are  
449 induced to higher levels in TCR $\delta^{-/-}$  mice than WT mice, including a number of interferon-  
450 responsive chemokines such as *cxcl9*, *cxcl13* and *ccl5* (**Fig. 8C**). This correlates with enhanced  
451 expression of *ifna2* observed in VACV-infected TCR $\delta^{-/-}$  mice (**Fig. 8B**). However, we also  
452 observed that two IL-10 superfamily members, *il10* and *il22*, which were upregulated upon dermal  
453 VACV infection (**Fig. 7A**), were not upregulated in VACV-infected TCR $\delta^{-/-}$  mice (**Fig. 8B**), and  
454 were markedly (8-15 fold) and significantly downregulated in VACV-infected TCR $\delta^{-/-}$  mice vs.  
455 VACV-infected WT mice (**Fig. 8C**). Notably, expression of neither *il10* nor *il22* was modulated in

456 uninfected TCR $\delta^{-/-}$  mice (**Fig. 8A**), indicating that the deficiency in *il10* and *il22* expression was  
457 both  $\gamma\delta$  T cell- and VACV-dependent.

458 To examine whether  $\gamma\delta$  T cells express IL-22 directly, or cause its production indirectly,  
459 we utilized Catch22 mice, in which the IL-22 promoter drives expression of the fluorescent  
460 reporter molecule, tdTomato [75]. We infected those mice i.d. with VACV expressing GFP,  
461 harvested cells on d5 post-infection and assessed tdTomato fluorescence in GFP<sup>+</sup> and GFP<sup>-</sup> cell  
462 populations liberated from the ear. As expected, and as previously published [59] we found that  
463 a large number (~7%) of EpCAM<sup>+</sup>CD45<sup>-</sup> KCs were VACV-infected, but we found no tdTomato  
464 fluorescence in either infected or uninfected KC populations (**Fig. 8D**). We next separated  
465 immune cell populations present at the site of VACV infection into resident (EpCAM<sup>+</sup>CD45<sup>+</sup>, **Fig.**  
466 **8E**) or recruited (EpCAM<sup>-</sup>CD45<sup>+</sup>, **Fig. 8G**) populations. Both resident and recruited populations  
467 displayed significant levels of infection (GFP fluorescence, **Fig. 8E, G**), but the resident population  
468 displayed a much higher proportion of cells displaying IL-22 production than the much more  
469 numerous recruited population (tdTomato fluorescence, **Fig. 8E, G**). Within the resident immune  
470 cells, there were distinct populations of cells that were infected (GFP<sup>+</sup>), infected and producing  
471 IL-22 (GFP<sup>+</sup> tdTomato<sup>+</sup>), and uninfected but also producing IL-22 (GFP<sup>-</sup> tdTomato<sup>+</sup>) (**Fig. 8E**). To  
472 ascertain the contribution of resident  $\gamma\delta$  T cells to IL-22 production, we also stained cells with an  
473 anti- $\gamma\delta$  TCR antibody. We were able to observe VACV infection of resident EpCAM<sup>+</sup>  $\gamma\delta$  T cells  
474 (**Fig. 8F**), as previously (**Fig. 1C**), and a large population of IL-22-producing resident  $\gamma\delta$  T cells  
475 (**Fig. 8F**), but production of IL-22 by VACV-infected  $\gamma\delta$  T cells was minimal (**Fig. 8F**). Therefore,  
476 it is likely that other resident CD45<sup>+</sup> cells that are VACV-infected also contribute to production of  
477 IL-22. Within the recruited (EpCAM<sup>-</sup>) immune cell populations, IL-22 production has often been  
478 attributed to a population of T<sub>CD4+</sub>, so we examined VACV infection and IL-22 production in  $\gamma\delta$   
479 TCR<sup>-</sup> lymphocyte populations (**Fig. 8H**) and compared this to infection of, and IL-22 production  
480 by, recruited  $\gamma\delta$  T cells (**Fig. 8I**). We found that infection of both populations of recruited

481 lymphocytes was minimal (**Fig. 8H, I**), but that recruited  $\gamma\delta$  T cells, and not other lymphocytes,  
482 also produced IL-22. Finally, we examined the contribution of  $\gamma\delta$  T cells to *il22* mRNA levels on  
483 d5 post-VACV infection of the ear, and found that, although there was a slight increase in *il22*  
484 transcript levels in VACV-infected TCR $\delta^{-/-}$  mice compared to uninfected TCR $\delta^{-/-}$  mice, this  
485 induction was markedly and statistically significantly lower than the induction we observed in  
486 VACV-infected WT mice (**Fig. 8J**). Taken together, the data from **Figure 8 D-J** indicate that both  
487 resident and recruited  $\gamma\delta$  T cells are major producers of IL-22 during dermal VACV infection.

488 To examine whether  $\gamma\delta$  T cells express IL-10, the other molecule we identified as  
489 modulated in the VACV-infected ear, we utilized mice in which an internal ribosome entry site  
490 (IRES)-enhanced green fluorescent protein (*eGFP*) fusion protein was placed downstream of  
491 exon 5 of the interleukin 10 (*Il10*) gene (Vert-X mice) [76]. We were able to detect a small but  
492 distinct and reproducible population of cells liberated from the VACV-infected ear that were GFP<sup>+</sup>  
493 5d after infection of the IL-10-GFP reporter mice (**Fig. 8L**), but not of WT mice (**Fig. 8K**). CD45<sup>-</sup>  
494 EpCAM<sup>+</sup> KCs did not contribute to the IL-10-GFP signal observed (not shown), and the d5 time  
495 point examined is prior to accumulation of antigen-specific T<sub>CD8+</sub> [11, 61] that have been shown  
496 to produce IL-10 [77], so we examined IL-10 production by resident (EpCAM<sup>+</sup>) or recruited  
497 (EpCAM<sup>-</sup>)  $\gamma\delta$  T cells or myeloid cells, as previously identified in **Figure 4**. In contrast to the  $\gamma\delta$  T  
498 cell production of IL-22 observed above (**Fig. 8F, I**), we did not find IL-10 production by either  
499 resident or recruited  $\gamma\delta$  T cell populations (**Fig. 8M, O**). In contrast, we did find production of IL-  
500 10/GFP by resident, but not recruited, myeloid cells populations (**Fig. 8N, P**). Therefore,  $\gamma\delta$  T cells  
501 do not appear to express IL-10 directly upon VACV infection, but may modulate its expression in  
502 other ways.

503 Our identification of  $\gamma\delta$  T cell-modulated genes above is a minimalistic one, so we sought  
504 to examine a number of other genes that have been linked to both  $\gamma\delta$  T cells and wound healing.  
505 Two of these genes, Fibroblast growth factor 9 (*fgf9*, **Fig. 8Q** [39]) and Keratinocyte Growth Factor

506 (*fgf7*, **Fig. 8R** [41]) were upregulated in the ear >40-fold at d5 post-VACV infection in WT mice,  
507 but *fgf9* was not upregulated above the levels observed in uninfected mice in VACV-infected  
508 TCR $\delta^{-/-}$  mice (**Fig. 8Q**), and the upregulation of *fgf7* was markedly reduced (**Fig. 8R**). Therefore,  
509  $\gamma\delta$  T cells directly or indirectly modulate the expression of multiple genes involved in the wound  
510 healing program initiated by cutaneous VACV infection.

## 512 **Discussion**

513           It is generally accepted that the local innate immune response to a peripheral virus  
514 infection is designed to slow virus replication and spread until an adaptive response can be  
515 initiated that will eliminate the virus and prevent re-infection. However, a key factor governing the  
516 extent of both the innate and adaptive immune response is that neither response should  
517 deleteriously affect the host, making it more susceptible to secondary infections, particularly via  
518 loss of barrier functions in the periphery (skin, airways etc.). Typically, this is represented in  
519 textbooks as a temporally regulated process, with the immune system gaining control over the  
520 virus, followed by a subsequent switch to reparative mechanisms that ameliorate tissue damage  
521 inflicted by both the virus and the ensuing host response. However, in this report we have  
522 described the initiation of a wound healing program in the skin concurrent with the deployment of  
523 innate antiviral strategies. The action of this wound healing program can alter tissue pathology  
524 following virus infection, independent of the control of virus replication and spread. The presence  
525 of two ongoing responses at the same time, and in very close physical proximity to each other,  
526 raises the possibility that the antiviral and wound healing responses could act synergistically to  
527 enhance each other by increasing the efficiency of monocyte recruitment, or interferon production  
528 (see below). However, it is also possible that components of one response will act to decrease  
529 the efficiency of the other. In either case, it is clear that wound healing after a cutaneous virus  
530 infection differs mechanistically from sterile wound healing, creating novel points of therapeutic  
531 intervention that could enhance wound healing and successful closure of the barrier surface to  
532 prevent secondary bacterial infection.

533           In a number of previous manuscripts we and others have described a role for various  
534 aspects of the local innate immune response, including two distinct monocyte populations [11,  
535 59], reactive oxygen species [11] and Type I IFN [13], in amelioration of tissue damage following  
536 peripheral VACV infection. However, in each of these publications we found little or no effect of  
537 these components of the innate immune response upon local virus replication, despite often



538 profound effects upon local tissue pathology [11, 13, 59]. Having outlined a wound healing  
539 program initiated upon cutaneous virus infection here, we can now retrospectively place each of  
540 these innate immune responses into that program. Recruitment of monocytes to a wound is  
541 required for effective wound healing to occur [78, 79], as is the Type I IFN receptor [80, 81].  
542 Similarly, Ly6G<sup>+</sup> cells are recruited to a wound [82]) and produce nitric oxide to facilitate  
543 accelerated wound healing [83]. Following VACV infection Ly6G<sup>+</sup> cells produce ROS, which can  
544 also act to increase wound healing [84], and ablation of ROS production following VACV infection  
545 causes a large increase in pathology [11]. Therefore, all of our previous observations in which  
546 depletion or ablation of various components of the immune system has minor changes upon local  
547 virus replication, but substantial changes upon local tissue pathology, can be attributed to  
548 alterations in an early wound healing response.

549         Here, we initially investigated the role of  $\gamma\delta$  T cells in control of replication and spread of  
550 VACV following cutaneous infection.  $\gamma\delta$  T cells have been implicated in the host response to VACV  
551 [7-10] and other poxviruses [49-53] after systemic infection. This protective effect has been  
552 attributed to cytolytic activity against VACV-infected cells [7, 10], or to  $\gamma\delta$  T cell-mediated  
553 production of IFN- $\gamma$  [8, 50]. Here, following cutaneous infection with VACV, we show that  
554 epidermal V $\gamma$ 3<sup>+</sup> DETC, which are a major population in mice but not in humans [85], acquire a  
555 GzB<sup>+</sup> CD107a<sup>+</sup> cytolytic phenotype. Neither the resident nor recruited dermal  $\gamma\delta$  T cell populations  
556 acquire this cytolytic phenotype. However, we and others [86] have found no difference in VACV  
557 replication in the skin of mice lacking  $\gamma\delta$  T cells, so any cytolytic contribution of these cells may  
558 be compensated for by infiltrating  $\alpha\beta$  T cells. None of the resident or recruited cutaneous  $\gamma\delta$  T cell  
559 populations appeared to be primed to make IFN- $\gamma$  after VACV infection, even after *in vitro*  
560 restimulation, and there was a small increase in IFN- $\gamma$  production in the skin of VACV-infected  
561 TCR $\delta^{-/-}$  mice compared to WT mice. However, KCs did make IFN- $\gamma$  protein shortly after VACV  
562 infection, and this contributed to control of pathology, but not to control of VACV replication.

563 Therefore, the functions previously attributed to  $\gamma\delta$  T cells in control of virus replication and virus-  
564 induced pathology do not play a role in the pathology observed after cutaneous infection of  $\text{TCR}\delta^{-/-}$   
565 mice with VACV.

566 A sizeable portion of dermal  $\gamma\delta$  T cells produced IL-17A after cutaneous VACV infection,  
567 a cytokine that is required for efficient wound healing [24, 87]. IL-17A mRNA was reduced to  
568 almost background levels in VACV-infected  $\text{TCR}\delta^{-/-}$  mice 5 days after infection, a time point that  
569 precedes the later infiltration of  $\text{T}_{\text{CD4}^+}$  that may produce IL-17A. Indeed, 8 days after infection, it  
570 was primarily  $\text{T}_{\text{CD8}^+}$ , not  $\text{T}_{\text{CD4}^+}$ , that produced IL-17A upon the restimulation of  $\alpha\beta$  T cells from  
571 infected skin. However, at early time points after infection, dermal  $\gamma\delta$  T cells likely moderate wound  
572 healing, at least partially, via production of IL-17A in response to cutaneous VACV infection.  $\gamma\delta$  T  
573 cells have long been known to play a role in cutaneous wound healing after activation by KCs  
574 [30-33], where they migrate to a site of injury [26, 34, 35] and produce of a number of cytokines  
575 that promote the wound healing response [36-44]. We did find a marked increase in VACV-  
576 induced pathology in the absence of  $\gamma\delta$  T cells, consistent with a role for these cells in  
577 establishment of the wound healing response following VACV infection.

578 Our data clearly demonstrate that  $\gamma\delta$  T cells are modulating VACV-induced skin  
579 pathology. The enhanced wound that results from VACV infection in the absence of  $\gamma\delta$  T cells  
580 prompted us to examine the range of wound healing-associated molecules induced by VACV  
581 infection that is discussed above. When we examined changes in the wound healing signature  
582 induced by cutaneous VACV infection in  $\text{TCR}\delta^{-/-}$  mice we originally anticipated that  $\gamma\delta$  T cells may  
583 alter the profile of chemokines that are induced. This is because  $\gamma\delta$  T cells have previously been  
584 reported to change recruitment of monocytes and neutrophils [26, 27], including after VACV  
585 infection [86]. In addition, IL-17A is reported to modulate neutrophil recruitment via an effect on  
586 expression of CXC chemokines [88], so in the absence of  $\gamma\delta$  T cell-produced IL-17A a defect in  
587 neutrophil recruitment would be anticipated. However, we found no discernable role for  $\gamma\delta$  T cells

588 in modulation of chemokine or chemokine receptor expression after VACV infection, and  
589 observed equivalent recruitment of myeloid cell populations in VACV-infected WT and  $\text{TCR}\delta^{-/-}$   
590 mice. The differences we observed from a previously published report, in which VACV-infected  
591  $\text{TCR}\delta^{-/-}$  mice exhibited less pathology than infected WT mice, likely because of alterations in  
592 neutrophil recruitment [86], may be attributable to the cutaneous microbiome in animal facilities.  
593 We have anecdotally observed a marked difference in both the magnitude and mechanisms  
594 involved in VACV-induced pathology in mice in the presence or absence of pathogenic bacteria,  
595 so strive to ensure that mice are kept as pathogen-free as possible without rederivation into a  
596 germ-free facility. The composition of the skin microbiome has a profound effect upon wound  
597 healing [89], and future studies in germ-free animals reconstituted with different skin-resident  
598 bacteria will likely reveal roles for specific bacterial/host interactions after both “sterile” and virus-  
599 infected wounding.

600         When we examined the difference between the constitutive expression of wound healing-  
601 associated cytokines in WT vs  $\text{TCR}\delta^{-/-}$  mice we found two genes that were downregulated in  
602  $\text{TCR}\delta^{-/-}$  mice, in the absence of virus infection. Expression of these two genes that encode IL-16  
603 and adiponectin was also reduced in infected  $\text{TCR}\delta^{-/-}$  mice vs. infected WT mice. IL-16 typically  
604 increases inflammation in the skin and inhibits the wound healing response [90], but adiponectin  
605 promotes wound healing by increasing KC proliferation and migration [91]. Therefore, deficits in  
606  $\gamma\delta$  T cells may partially account for the previously described defect in sterile wound healing [32,  
607 44] via reduced expression of adiponectin.

608         Upon VACV infection of  $\text{TCR}\delta^{-/-}$  mice, we found a similar response to that observed in WT  
609 mice, with upregulation of many of the mediators of wound healing that we had observed in WT  
610 mice, and downregulation of a similar pattern of cytokines as well. However, there were two  
611 marked changes between VACV-infected  $\text{TCR}\delta^{-/-}$  and WT mice, namely a failure to upregulate  
612 expression of the IL-10 family members, *il22* and *il10*, in  $\text{TCR}\delta^{-/-}$  mice in response to VACV

613 infection. IL-10 is produced after VACV infection by  $T_{CD8+}$ , but is also induced prior to the infiltration  
614 of large numbers of these cells, indicating a role for  $\gamma\delta$  T cell-mediated production. However,  
615 although  $\gamma\delta$  T cells from the liver can produce IL-10 following bacterial infection [92], we found  
616 that  $\gamma\delta$  T cells do not produce IL-10 themselves, but induce production from other cells, likely skin-  
617 resident myeloid cells such as Langerhans cells and dermal DC (**Fig. 8 M, N, O**). IL-10 production  
618 drives skin regeneration, likely by altering the phenotype of macrophages, as the IL-10R is not  
619 expressed by KCs [93]. Therefore, a reduction in IL-10 expression may drive part of the increase  
620 in pathology we observe following VACV infection of  $TCR\delta^{-/-}$  mice. Such an increase in pathology  
621 may actually be detrimental to the virus, as some skin-tropic poxviruses encode an IL-10 homolog  
622 that enhances wound healing [94-97], indicating that IL-10 expression may be evolutionarily  
623 beneficial for the virus during natural skin infection, perhaps by inhibiting the chances of a  
624 competing local secondary bacterial infection.

625         Expression of IL-22 is often associated with inflammatory skin conditions, such as  
626 psoriasis [98], where it is often co-expressed with IL-17A [99]. Expression of both IL-22 and IL-  
627 17A are most often associated with Th17  $T_{CD4+}$  cells, but both cytokines are produced in large  
628 quantities in cutaneous tissue by  $\gamma\delta$  T cells [100]. Although technical issues prevented us from  
629 establishing that the same populations of  $\gamma\delta$  T cells produce both IL-17A and IL-22 following  
630 cutaneous VACV infection, it is clear that the majority of these cytokines produced at d5 post-  
631 VACV infection come from  $\gamma\delta$  T cells, and these cytokines likely drive important components of  
632 the early wound healing response. IL-22 acts on dermal fibroblasts to drive expression of  
633 extracellular matrix proteins [101], and on KCs to increase proliferation [98, 102, 103] via miR-  
634 197-driven mechanisms [104], as observed after bacterial skin infection [105]. In addition to the  
635 IL-10 family members, we also found that expression of both *fgf7* (encoding KC Growth factor)  
636 and *fgf9* were markedly reduced in VACV-infected  $TCR\delta^{-/-}$  mice, consistent with reports of their

637 production by  $\gamma\delta$  T cells and roles in cutaneous wound healing [39, 44]. Therefore,  $\gamma\delta$  T cells  
638 contribute in multiple ways to the cutaneous wound healing response following VACV infection.

639 In summary, we find here that neither resident nor recruited  $\gamma\delta$  T cells, nor cytokines  
640 produced by these cells, are involved in control of virus replication or spread following cutaneous  
641 infection. Rather, we describe here a uniquely configured wound healing response initiated in the  
642 skin of virus-infected mice prior to the peak of virus replication and before adaptive immune  
643 mechanisms have been deployed successfully to clear the infection. We find that both resident  
644 and recruited  $\gamma\delta$  T cells are part of this induced wound healing response via production of IL-17A,  
645 IL-22 and induction of IL-10 in other cells, and that a deficit in  $\gamma\delta$  T cells causes a profound  
646 increase in tissue pathology following infection. These findings are important in understanding  
647 how wound healing is mediated following a cutaneous virus infection in comparison to the  
648 paradigm of sterile wound healing. A prompt and appropriately controlled wound healing response  
649 is crucial to prevent secondary bacterial infections that could be deleterious for the virus-infected  
650 host, but also potentially for the virus itself.

## 651 **Materials and Methods**

### 652 *Mice*

653 C57BL/6 (wild-type, WT) mice were purchased from Charles River Laboratories or  
654 Jackson Laboratories. Breeding pairs of B6.129P2-Tcrd<sup>tm1Mom</sup>/J (TCR $\delta^{-/-}$ ) [106], IL-10/GFP (Vert-  
655 X) reporter mice [76], and IL-22/tdTomato (Catch22) reporter mice [75] were purchased from  
656 Jackson Laboratories. These mice were on a WT background after a minimum of 12 backcrosses  
657 to C57BL/6 and bred in the specific-pathogen-free animal facility at the Penn State Hershey  
658 College of Medicine. All animals were housed and cared for according to guidelines from the  
659 National Institutes of Health and American Association of Laboratory Animal Care (AALAC). The  
660 Penn State Hershey College of Medicine Institutional Animal Care and Use Committee (IACUC)  
661 approved all animal experiments and procedures.

662

### 663 *Viruses and infections*

664 Stocks of VACV strain WR were produced in 143B TK<sup>-</sup> cells and purified from cell lysate  
665 following ultracentrifugation through a cushion of 45% sucrose. VACV-GFP was previously  
666 described [107]. For intradermal (i.d.) infections, mice aged 7-10 weeks were anesthetized with  
667 ketamine/xylazine and injected with 10<sup>4</sup> PFU of VACV in <10  $\mu$ L in each ear pinna.

668 To monitor pathogenesis in the ears, ear thickness was measured using a 0.0001 in.  
669 micrometer (Mitutoyo, Aurora, IL). Lesion progression and subsequent tissue loss were  
670 subsequently measured daily. To measure titers of virus *in vivo*, ears and ovaries (the target organ  
671 of VACV systemic spread [12]) were freeze-thawed three times, homogenized, and sonicated,  
672 then titers in cell lysates were assayed by plaque assay on 143B TK<sup>-</sup> cells as previously described  
673 [61]. Plaques were counted two days later.

674

### 675 *Cell isolation and flow cytometry*

676 Pairs of ears from each mouse were split into dorsal and ventral halves, minced, and  
677 digested in a solution of 1 mg/mL collagenase type XI (Sigma-Aldrich, St. Louis, MO) in media  
678 supplemented with 2% FBS and 5 mM CaCl<sub>2</sub> for 1 hour at 37°C, 5% CO<sub>2</sub>. Collagenase was  
679 quenched with media containing 5% FBS and 5 mM EDTA. Digested tissue was passed through  
680 40 µm nylon cell strainers to create a single cell suspension. For intracellular cytokine staining  
681 and CD107a degranulation assays, cells from 3 pairs of ears were pooled and 10<sup>6</sup> of those cells  
682 stimulated prior to staining for flow cytometry (see below).

683 Blockade of FcR-mediated binding of mAbs and subsequent staining of cells was  
684 performed in supernatant from flasks of 2.4G2 hybridoma cells supplemented with 10% normal  
685 mouse serum. All mAbs used were purchased from BD Pharmingen: CD45 (30-F11), CD3ε (145-  
686 2C11), TCRδ (GL3), CD4 (RM4-5), NK1.1 (PK136), CD19 (1D3), CD90.2 (53-2.1), CD11b  
687 (M1/70), Ly6C (AL-21), Ly6G (1A8), CD107a (1D4B), Granzyme B (GB11), IL-17A (TC11-  
688 18H10), TNFα (MP6-XT22) and IFN-γ (XMG1.2). We also utilized the following from Biolegend:  
689 Vγ2 TCR (UC3-10A6), Vγ3 TCR (536) and CD64 (X54-5/7.1). CD8α (53-6.7) and CD11c (N418)  
690 were obtained from eBioscience. In addition, PE-Cy7 conjugated streptavidin (eBioscience) was  
691 used to label biotin-conjugated antibodies. To stain for granzyme B, cells were stained for surface  
692 markers, fixed in 2% paraformaldehyde (Electron Microscopy Sciences, Hatfield, PA), then  
693 permeabilized and stained intracellularly for granzyme B in 2.4G2 supernatant containing 10%  
694 normal mouse serum and 0.5% saponin (Sigma). Sample data was acquired on either an LSR II  
695 or LSR Fortessa flow cytometer (both from BD Biosciences, San Jose, CA) and analyzed using  
696 FlowJo software (Tree Star, Ashland OR).

697

#### 698 *Intracellular cytokine staining assay*

699 Single cell suspensions of ears were stimulated for 5 hours at 37°C, 5% CO<sub>2</sub> with 50 ng/mL  
700 phorbol myristate acetate (PMA; Sigma) and 1 µg/mL ionomycin (Sigma) or unstimulated in the

701 presence of 10  $\mu\text{g}/\text{mL}$  brefeldin A (BFA; Sigma). For T cell stimulations, lymphocytes were  
702 isolated by centrifugation over Lymphocyte Separation Medium (Cambrex) and then stimulated  
703 for 4 h with 1  $\mu\text{M}$  VACV peptide prior to the addition of BFA. VACV-derived peptides B8R, A8R,  
704 A3L, A23R, K3L, A47L, A42R, A19L, 10G2 have been previously described [108]. Following  
705 PMA/ionomycin or peptide stimulation, cells were blocked in 2.4G2 supernatant containing 10%  
706 mouse normal mouse serum and then stained for CD45, CD3 $\epsilon$ , TCR  $\delta$ , V $\gamma$ 2 TCR, V $\gamma$ 3 TCR, and  
707 CD4. Cells were fixed in 2% paraformaldehyde then permeabilized and stained for intracellular  
708 IL-17A and IFN- $\gamma$  in 2.4G2 supernatant supplemented with 10% normal mouse serum and 0.5%  
709 saponin. Net frequencies and numbers of cytokine-positive T<sub>CD8+</sub> were calculated by subtracting  
710 the unstimulated background response.

711

#### 712 *CD107a degranulation assay*

713 Cells from ears were stimulated for 5 hours at 37°C, 5% CO<sub>2</sub> with 50 ng/mL PMA and 1  
714  $\mu\text{g}/\text{mL}$  ionomycin or unstimulated in the presence of 1.5  $\mu\text{g}/\text{mL}$  monensin (Sigma) and PE-  
715 conjugated rat anti-mouse CD107a. Following stimulation, cells were blocked in 2.4G2  
716 supernatant containing 10% normal mouse serum and then stained for CD45, CD3 $\epsilon$ , TCR  $\delta$ , V $\gamma$ 2  
717 TCR, V $\gamma$ 3 TCR, and CD8 $\alpha$ .

718

#### 719 *Immunofluorescence Microscopy*

720 Ears were harvested and embedded in Tissue-Tek OCT (Sakura Finetek), then rapidly  
721 frozen by immersion in liquid nitrogen-cooled 2-methyl butane, and kept at -80 °C overnight.  
722 Cryostat sections (10-12  $\mu\text{m}$ ) were cut at -20°C, mounted on glass slides, air-dried for 2-3 hours,  
723 fixed for 10-15 minutes in 1% paraformaldehyde (pH 7.4), air-dried again for 30 minutes, and  
724 stained with antibodies to TCR $\delta$ , Ly6C, Ly6G or CD8 (clones as above). Positive signal was  
725 revealed by subsequent staining with fluorescently-labeled secondary antibodies. Staining was



726 visualized using an Olympus 1X81 deconvolution microscope and Slidebook 5.0 digital  
727 microscope.

728

### 729 *Quantitative PCR*

730 Tissues were harvested, digested as above, and total RNAs were extracted using RNeasy  
731 Plus Mini Kit (Qiagen) with DNase treatment according to the manufacturer's protocol. For qPCR  
732 using Taqman Gene Expression Assays (Applied Biosystems) or Universal Probe Library  
733 (Roche), cDNA was prepared using the Hi-Capacity cDNA Synthesis Kit (Applied Biosystems).  
734 For qPCR using RT<sup>2</sup> PCR Profiler Arrays (Qiagen), cDNA was prepared using RT<sup>2</sup> First Strand  
735 Kit (Qiagen). qPCR was carried out on a StepOnePlus (Applied Biosystems) with either FastStart  
736 Universal Probe Master Mix (Roche) or RT<sup>2</sup> SYBR Green qPCR Master Mix (Qiagen). For  
737 Taqman and FastStart Universal Probe assays, changes in gene expression are expressed as  
738 fold change using the  $\Delta\Delta^{Ct}$  calculation method against naïve mice of the same genotype with  
739 *gapdh* as the housekeeping gene. For RT<sup>2</sup> PCR Profiler Array data, changes in gene expression  
740 are displayed as mean fold change between groups of mice relative to a panel of "housekeeping"  
741 genes. SYBR Green primers were as follows: *fgf7* forward 5'-ATAGAAACAGGTCGTGACAAGG-  
742 3' reverse 5'-CAGACAGCAGACACGGAAC-3'  
743 *fgf9* forward 5'-GTAGAGTCCACTGTCCACAC-3' reverse 5'-CAACGGTACTATCCAGGGAAC-  
744 3'. Taqman primer/probe sets (Thermo Fisher) were as follows: *il17a* (Mm00439618\_m1), *il22*  
745 (Mm00444241\_m1), *gapdh* (Mm99999915\_g1) and *ifng* (Mm01168134\_m1).

746

747

748

749

750

### 751 **Acknowledgements**

752 We thank colleagues Drs. Jon Yewdell and Jack Bennink for the WR VACV used in these studies.

753 We thank Melanie Epler and Jennifer Mellinger for excellent technical support of these studies.

754 We also the Penn State College of Medicine flow cytometry core facility and Karen Briar, Robin

755 Goshorn, Jeanette Mohl, Dr. Tim Cooper, and Dr. Tiffany Whitcomb for essential animal handling

756 and veterinary assistance. We also thank Dr. Nick Buchkovich for critical review of the manuscript.

757

758 **Author Contributions**

759 Conceived and designed the experiments: IER, EL, AMN and CCN. Performed experiments:

760 CCN, EL, IER, TEK, and NJP. Analyzed the data: EL, IER, TEK, and NJP. Wrote the paper: CCN.

761 **Figure Legends**

762 **Figure 1. Infected and uninfected  $\gamma\delta$  T cells localize within VACV-infected foci in the skin.**

763 WT (A) and TCR $\delta^{-/-}$  (B) mice were infected with  $10^4$  PFU of VACV-GFP using a bifurcated needle.

764 At d4 p.i., ears were harvested, frozen and sections stained with antibody to TCR $\delta$  (red). Infected

765 GFP+ cells are visualized in green. (C) To confirm that VACV infected  $\gamma\delta$  T cells, we infected mice

766 i.d. with  $10^4$  PFU of VACV, or VACV-GFP, then harvested and digested ears for flow cytometric

767 analysis on d4 p.i.. A proportion of  $\gamma\delta$  T cells, identified as CD45 $^+$ , CD3 $^+$ ,  $\gamma\delta$  TCR $^+$  showed clear

768 GFP fluorescence. (D) For all subsequent analyses, debris and dead cells were first excluded by

769 a “live” cell gate. Singlets were identified by side scatter area (SSC-A) vs forward scatter width

770 (FSC-W), and then lymphocytes gated according to light scatter area. Within CD45 $^+$  cells, CD3 $\epsilon^+$

771 T cells were subdivided into  $\gamma\delta$  T cells (TCR $\delta^+$ ) and  $\alpha\beta$  T cells (TCR  $\delta^-$ ), which include T $_{CD4^+}$  and

772 T $_{CD8^+}$ .  $\gamma\delta$  T cell subsets in the skin were identified as follows: V $\gamma 3^+$  dendritic epidermal T cells

773 (DETC) and V $\gamma 2^+$  or V $\gamma 2^-V\gamma 3^-$  dermal  $\gamma\delta$  T cells. Data depicts T cells in ears of WT mice at d4 p.i.

774 with VACV and is representative. (E, F) WT mice were infected i.d. with  $10^4$  pfu VACV. Cells were

775 harvested from whole ears of mice at d0 (uninfected), 2, 4, 8, 10, 15, and 25 p.i. and T cell

776 responses monitored by flow cytometry. (E) Numbers of total  $\gamma\delta$  T cells (CD3 $\epsilon^+$ TCR $\delta^+$ , black

777 circles), T $_{CD4^+}$  (CD3 $\epsilon^+$ TCR $\delta^-$ CD4 $^+$ , gray squares), and T $_{CD8^+}$  (CD3 $\epsilon^+$ TCR $\delta^-$ CD8 $\alpha^+$ , triangles) cells

778 per pair of uninfected and infected ears. (F) Numbers of epidermal-resident V $\gamma 3^+$  DETC (gray

779 circles) compared to V $\gamma 2^+$  or V $\gamma 2^-V\gamma 3^-$  dermal  $\gamma\delta$  T cells (black squares and diamonds,

780 respectively) in ears after i.d. VACV infection. Values at each time point represent the mean  $\pm$

781 SEM in 6-10 pairs of ears from 3 independent experiments.

782

783 **Figure 2. Infected TCR $\delta^{-/-}$  mice display enhanced tissue pathology, but no difference in**

784 **local VACV replication or systemic virus spread. WT (A-F, E, I, H, K) or TCR $\delta^{-/-}$  (C-E, G, H,**

785 **J, K) mice were infected i.d. in the ear pinnae with  $10^4$  pfu of VACV and ears harvested and**

786 dissociated for analysis on d4 (**A, B**) or d8 (as shown, **A, B**) post-infection. Gating strategies are  
787 as shown in Figure 1. Potential cytolytic function, was measured by cell surface expression of  
788 CD107a (LAMP1) in response to activation with PMA-ionomycin (**A**), or intracellular expression  
789 of granzyme B (**B**) by  $V\gamma 3^+$  DETC,  $V\gamma 2^+$  or  $V\gamma 2^-V\gamma 3^-$  dermal  $\gamma\delta$  T cells,  $T_{CD4^+}$  or  $T_{CD8^+}$  on d4 or d8  
790 post-infection.  $T_{CD8^+}$  were undetectable at the site of infection at d4 post-infection, so are only  
791 shown at d8 post-infection. (**C-E, H, K**) WT (circles) or  $TCR\delta^{-/-}$  (squares) mice were infected i.d.  
792 in the ear pinnae with  $10^4$  PFU of VACV. On d5 (**C**) and d12 (**D**) p.i., pairs of ears and ovaries  
793 were harvested from infected WT and  $TCR\delta^{-/-}$  mice to measure titers of VACV by plaque assay.  
794 Data is representative of 7 pairs of ovaries and ears per group from 2 independent experiments.  
795 Tissue swelling (**E**) was assessed through 6 days after infection. The appearance of lesions in  
796 WT (**F**) or  $TCR\delta^{-/-}$  (**G**) mice was visualized 8 days after infection, and lesion size quantified (**H**)  
797 through 21 days post infection. The ensuing tissue loss in WT (**I**) or  $TCR\delta^{-/-}$  (**J**) mice was visualized  
798 14 days after infection and quantified (**K**) through 21 days post infection. Data in (**E, H** and **K**)  
799 depict the mean  $\pm$  SEM of 30 ears per group from 3 independent experiments. \* $p < 0.05$ , \*\* $p < 0.005$ ,  
800 \*\*\* $p < 0.0001$  by Student's t-test.

801  
802 **Figure 3.  $T_{CD8^+}$  recruitment, localization and function are not affected in the absence of  $\gamma\delta$**   
803 **T cells.** WT or  $TCR\delta^{-/-}$  mice were infected i.d. with  $10^4$  PFU VACV per ear and cells harvested to  
804 analyze the recruitment, localization and function of  $T_{CD8^+}$ . Ears were harvested on d5 (**A**) or d8  
805 post infection (**B-H**) and numbers of  $T_{CD8^+}$  (**A, B**), localization of  $T_{CD8^+}$  (in red) relative to VACV  
806 infected cells (in green) (**C, D**), numbers of  $T_{CD8^+}$  in the VACV infected ear producing  $IFN-\gamma$  (**E**) or  
807  $TNF\alpha$  (**F**) directly ex vivo or proportion of splenic  $T_{CD8^+}$  producing  $IFN-\gamma$  (**G**) or  $TNF\alpha$  (**H**) in  
808 response to stimulation with VACV-derived MHC Class I binding epitopes.  
809

810 **Figure 4. Monocyte recruitment and localization is normal in mice lacking  $\gamma\delta$  T cells.** WT  
811 and TCR $\delta^{-/-}$  mice were infected i.d. in each ear pinnae with VACV. Gating strategy is shown in **A**.  
812 As in Figure 1, we first excluded debris and dead cells by scatter area and then gated on singlets  
813 by scatter area vs width. B cells, T cells, non-NK innate lymphoid cells (ILCs), and NK cells were  
814 “dumped” from CD45<sup>+</sup> cells by excluding CD19<sup>+</sup>, CD90.2<sup>+</sup> and NK1.1<sup>+</sup> cells. CD45<sup>+</sup>CD19<sup>-</sup>CD90.2<sup>-</sup>  
815 NK1.1<sup>-</sup>CD11c<sup>-</sup>CD11b<sup>+</sup> monocyte/macrophages were subdivided into Ly6C<sup>+</sup>Ly6G<sup>-</sup> classical  
816 inflammatory monocytes and Ly6C<sup>Int</sup>Ly6G<sup>+</sup>regulatory myeloid cells. Representative data from a  
817 WT mouse on d5 p.i. is shown in **B**. (**C-F**) Cells were harvested from VACV-infected WT or  
818 TCR $\delta^{-/-}$  mice to analyze the recruitment of Ly6C<sup>+</sup>Ly6G<sup>-</sup> and Ly6C<sup>+</sup>Ly6G<sup>+</sup> monocyte populations.  
819 (**C, D**) Quantification of Ly6C<sup>+</sup>Ly6G<sup>-</sup> inflammatory monocytes on d5 (**C**) and d8 (**D**) post-infection  
820 in WT vs TCR $\delta^{-/-}$  mice. (**E, F**) Quantification of Ly6C<sup>+</sup>Ly6G<sup>+</sup> monocytes on d5 (**E**) and d8 (**F**) post-  
821 infection in WT vs TCR $\delta^{-/-}$  mice. All values depict the number of cells per pair of ears. Data in  
822 (**B-F**) are representative of 6 pairs of ears per group from 3 independent experiments. (**G-J**) WT  
823 (**G, I**) or TCR $\delta^{-/-}$  (**H, J**) mice were infected i.d. with 10<sup>4</sup> PFU VACV-GFP per ear, ears harvested  
824 and frozen on d8 post-infection. Tissue sections were cut, stained with antibodies to GFP (in  
825 green) and either Ly6C (**G,H**) or Ly6G (**I, J**) (in blue) and visualized by deconvolution microscopy.  
826 Each image is representative of 4 ears per group from 2 experiments.

827

828 **Figure 5. IFN- $\gamma$  produced early after VACV infection, independent of  $\gamma\delta$  T cells, is required**  
829 **to control local tissue pathology but not local VACV replication or systemic virus spread.**

830 WT (**A, B, C, E, F, H-P**), TCR $\delta^{-/-}$  (**N**) or IFN- $\gamma$ R<sup>-/-</sup> (**B, D, E, G, H-K**) mice were infected i.d. in the  
831 ear pinnae with 10<sup>4</sup> pfu of VACV and ears harvested and dissociated for analysis. (**A**) Time course  
832 of IFN- $\gamma$  mRNA expression, measured by qPCR, in the ear after VACV infection. Data are  
833 representative of 3 independent experiments, showing the mean  $\pm$  SEM of 3 or 4 biological  
834 replicates in each. Tissue swelling (**B**) was assessed through 6 days post infection. The

835 appearance of lesions in WT (**C**) or IFN- $\gamma$ R<sup>-/-</sup> (**D**) mice was visualized 8 days after infection, and  
836 lesion size quantified (**E**) through 21 days post infection. The ensuing tissue loss in WT (**F**) or  
837 IFN- $\gamma$ R<sup>-/-</sup> (**G**) mice was visualized 14 days after infection and quantified (**H**) through 21 days post  
838 infection. Data in (**B**, **E** and **H**) depict the mean  $\pm$  SEM of 30 ears per group from 3 independent  
839 experiments. On d5 (**I-K**) post-infection, pairs of ears (**I**), spleen (**J**) and ovaries (**K**) were  
840 harvested from infected WT and IFN- $\gamma$ R<sup>-/-</sup> mice to measure titers of VACV by plaque assay. Data  
841 is representative of 7 pairs of ovaries and ears, and 7 spleens, per group from 3 independent  
842 experiments. (**L**) Production of IFN- $\gamma$  by V $\gamma$ 3<sup>+</sup> DETC, V $\gamma$ 2<sup>+</sup> or V $\gamma$ 2<sup>-</sup>V $\gamma$ 3<sup>-</sup> dermal  $\gamma\delta$  T cells from ear  
843 (gated as in **Fig. 1**) or by lymph node T<sub>CD4+</sub> or T<sub>CD8+</sub> (**M**) on d4 post-VACV infection in the presence  
844 of absence of PMA-ionomycin activation. Data in **L** and **M** are representative of 12 separate  
845 biological replicates from 3 independent experiments. (**N**) The relative IFN- $\gamma$  mRNA expression in  
846 the ear of WT or TCR $\delta$ <sup>-/-</sup> mice 4d after i.d. VACV infection. Data show the mean  $\pm$  SEM of data  
847 from 3 independent experiments with 3 biological replicates in each. Representative data (**O**) and  
848 compiled and quantified total data from 3 independent experiments with 3 biological replicates in  
849 each (**P**) of intracellular cytokine staining of IFN- $\gamma$  within EpCAM<sup>+</sup>CD45<sup>-</sup> KC, EpCAM<sup>+</sup>CD45<sup>+</sup>  
850 resident immune cells and EpCAM<sup>-</sup>CD45<sup>+</sup> recruited immune populations. \*p<0.05, \*\*p<0.005,  
851 \*\*\*p<0.0001 by Student's t-test

852

853 **Figure 6. Specific subsets of  $\gamma\delta$  T cells produce IL-17A upon cutaneous VACV infection.**

854 WT (**A-E**) or TCR $\delta$ <sup>-/-</sup> (**E**) mice were infected i.d. in the ear pinnae with 10<sup>4</sup> pfu of VACV. (**A**)  
855 Expression of *il17a* mRNA in the ear of VACV-infected or uninfected WT mice. (**B-D**) Gating  
856 strategies are as shown in Figure 1. Production of IL-17A by  $\gamma\delta$  T cells (**B**), or by V $\gamma$ 3<sup>+</sup> DETC, V $\gamma$ 2<sup>+</sup>  
857 or V $\gamma$ 2<sup>-</sup>V $\gamma$ 3<sup>-</sup> dermal  $\gamma\delta$  T cells (**C**) on d4 post-VACV infection in the presence of absence of PMA-  
858 ionomycin activation. (**D**) Quantitation of the numbers of cells displaying intracellular cytokine  
859 staining of IL-17A within V $\gamma$ 3<sup>+</sup> DETC, V $\gamma$ 2<sup>+</sup> or V $\gamma$ 2<sup>-</sup>V $\gamma$ 3<sup>-</sup> dermal  $\gamma\delta$  T cells populations on d4 post-

860 infection. **(E)** Expression of *il17a* mRNA in the ear of VACV-infected or uninfected WT or  $\text{TCR}\delta^{-/-}$   
861 mice, as shown, on d5 post-infection. Data are representative of 12 separate biological replicates  
862 from 3 independent experiments **(A-E)**.

863

864 **Figure 7. There is a wound healing signature induced in the ear of VACV infected mice.**

865 WT mice were infected i.d. in the ear pinnae with  $10^4$  pfu of VACV, ears harvested on d5 post-  
866 infection and mRNA levels of target molecules measured using Qiagen qPCR array plates as  
867 described in the methods sections. **(A)** Expression of cytokines and chemokines, and interferons  
868 and receptors, displayed using volcano plots, which demonstrate statistically significant points if  
869 above the  $p=0.05$  line. Gene expression changes in WT mice in response to VACV, with genes  
870 that are upregulated  $>2$ -fold by VACV infection in the upper right hand quadrant and genes that  
871 are downregulated  $> 2$ -fold by VACV infection in the upper left hand quadrant. Genes that are  
872 significantly ( $> 2$ -fold,  $p<0.05$ ) upregulated and have a defined role in wound healing are shown  
873 in red, and those that are significantly ( $> 2$ -fold,  $p<0.05$ ) downregulated and have a defined role  
874 in wound healing are shown in blue. **(B-F)** Representative plots from the data displayed in **(A)**,  
875 showing changes in mRNA levels on d5 post VACV-infection in genes associated with wound  
876 healing, including CC chemokines **(B)**, IL-10 superfamily members **(C)**, other cytokines and  
877 cytokine receptor antagonists **(D)**, growth factors, hormones and their receptors **(E)** and TGF- $\beta$   
878 superfamily members **(F)**.  $n=28$  naïve, 29 VACV-infected mice per group.

879

880 **Figure 8 Expression of wound healing molecules is altered in the absence of  $\gamma\delta$  T cells.**

881 WT or  $\text{TCR}\delta^{-/-}$  **(A-C, J, P, R)**, IL-22-TdTomato reporter **(D-I)** or IL-10GFP reporter **(K-P)** mice  
882 were infected i.d. in the ear pinnae with  $10^4$  pfu of VACV, ears harvested on d5 post-infection and  
883 **(A-C)** mRNA levels of target molecules, production of IL-22 **(D-I)** or IL-10 **(K-P)** by resident or  
884 recruited cell populations from the ear, or bulk mRNA expression levels of *il22* **(J)**, *fgf9* **(Q)** or *fgf7*

885 (KGF, **R**) measured. (**A-C**) Expression of cytokines and chemokines, displayed using volcano  
886 plots, which demonstrate statistically significant points if above the  $p=0.05$  line. (**A**) Cytokines  
887 and chemokines that are regulated in uninfected  $\text{TCR}\delta^{-/-}$  mice relative to WT mice, showing genes  
888 that are upregulated  $>2$ -fold in uninfected  $\text{TCR}\delta^{-/-}$  mice in the upper right hand quadrant and genes  
889 that are downregulated  $> 2$ -fold in uninfected  $\text{TCR}\delta^{-/-}$  mice in the upper left hand quadrant. (**B**)  
890 Gene expression changes in VACV-infected  $\text{TCR}\delta^{-/-}$  mice relative to uninfected  $\text{TCR}\delta^{-/-}$  mice, with  
891 genes that are upregulated  $>2$ -fold by VACV infection of  $\text{TCR}\delta^{-/-}$  mice in the upper right hand  
892 quadrant and genes that are downregulated  $> 2$ -fold by VACV infection of  $\text{TCR}\delta^{-/-}$  mice in the  
893 upper left hand quadrant. (**C**) Gene expression changes in VACV-infected  $\text{TCR}\delta^{-/-}$  mice relative  
894 to VACV infected WT, with genes that are upregulated  $>2$ -fold in  $\text{TCR}\delta^{-/-}$  mice in the upper right  
895 hand quadrant and genes that are downregulated  $> 2$ -fold in  $\text{TCR}\delta^{-/-}$  mice in the upper left hand  
896 quadrant. (**A-C**) Genes that are downregulated in VACV-infected  $\text{TCR}\delta^{-/-}$  mice relative to VACV-  
897 infected WT mice (*il10* and *il22*) are displayed in green to facilitate ease of recognition in each  
898 plot. (**D-I**) Ears of IL-22-TdTomato reporter infected with VACV-GFP were harvested on d5 post-  
899 infection and dissociated to yield single cell suspensions, then stained to identify resident or  
900 recruited cell populations. Density plots show infection (marked by VACV-GFP) vs. IL-22  
901 production (marked by TdTomato expression) within  $\text{EpCAM}^+\text{CD45}^-$  KC (**D**), resident immune  
902 cells ( $\text{EpCAM}^+\text{CD45}^+$ , **E**) and resident  $\gamma\delta$  T cells ( $\text{EpCAM}^+\text{CD45}^+\gamma\delta\text{TCR}^+$ , **F**), recruited immune  
903 cell populations ( $\text{EpCAM}^-\text{CD45}^+$ , **G**), recruited lymphocytes ( $\text{EpCAM}^-\text{CD45}^+\text{CD11b}\gamma\delta\text{TCR}^-$ , **H**)  
904 and recruited  $\gamma\delta$  T cells ( $\text{EpCAM}^-\text{CD45}^+\gamma\delta\text{TCR}^+$ , **I**). (**J**) Expression of *il22* in ear tissue of uninfected  
905 or VACV-infected WT or  $\text{TCR}\delta^{-/-}$  mice 5 dpi measured by RT-qPCR. (**K-P**) Ears of WT (**K**) or IL-  
906 10-GFP reporter (**L-P**) mice infected with VACV were harvested on d5 post-infection and  
907 dissociated to yield single cell suspensions, then stained to identify resident or recruited cell  
908 populations. Dot plots show IL-10 expression, (marked by GFP) in  $\text{CD45}^+$  from WT (**K**) or IL-10-  
909 GFP reporter mice (**L**). Density plots show  $\text{CD45}$  vs. IL-10 production (marked by GFP) within



910 resident (EpCAM<sup>+</sup>CD45<sup>+</sup>, **M**, **N**) or recruited (EpCAM<sup>-</sup>CD45<sup>+</sup>, **O**, **P**) immune populations,  
911 separated into  $\gamma\delta$  T cells ( $\gamma\delta$ TCR<sup>+</sup>, **M**, **O**) and myeloid cell populations (CD11b,  $\gamma\delta$ TCR<sup>-</sup>, **N**, **P**). (**Q**,  
912 **R**) Expression of *fgf9* (**Q**) or *fgf7*(**R**) (which encodes KGF) in ear tissue of uninfected or VACV-  
913 infected WT or TCR $\delta^{-/-}$  mice 5 dpi measured by RT-qPCR.

914 **References**

- 915 1. Liu L, Zhong Q, Tian T, Dubin K, Athale SK, Kupper TS. Epidermal injury and  
916 infection during poxvirus immunization is crucial for the generation of highly protective T  
917 cell-mediated immunity. *Nature medicine*. 2010;16(2):224-7. Epub 2010/01/19. doi:  
918 10.1038/nm.2078. PubMed PMID: 20081864; PubMed Central PMCID: PMC3070948.
- 919 2. Damaso CR, Esposito JJ, Condit RC, Moussatche N. An emergent poxvirus from  
920 humans and cattle in Rio de Janeiro State: Cantagalo virus may derive from Brazilian  
921 smallpox vaccine. *Virology*. 2000;277(2):439-49. Epub 2000/11/18. doi:  
922 10.1006/viro.2000.0603. PubMed PMID: 11080491.
- 923 3. Tscharke DC, Smith GL. A model for vaccinia virus pathogenesis and immunity  
924 based on intradermal injection of mouse ear pinnae. *J Gen Virol*. 1999;80 ( Pt 10):2751-  
925 5. PubMed PMID: 10573171.
- 926 4. Tscharke DC, Reading PC, Smith GL. Dermal infection with vaccinia virus reveals  
927 roles for virus proteins not seen using other inoculation routes. *J Gen Virol*. 2002;83(Pt  
928 8):1977-86. PubMed PMID: 12124461.
- 929 5. Reynolds MG, Holman RC, Yorita Christensen KL, Cheek JE, Damon IK. The  
930 Incidence of Molluscum contagiosum among American Indians and Alaska Natives. *PLoS*  
931 *ONE*. 2009;4(4):e5255. Epub 2009/04/22. doi: 10.1371/journal.pone.0005255. PubMed  
932 PMID: 19381289; PubMed Central PMCID: PMC2667635.
- 933 6. Vos T, Flaxman AD, Naghavi M, Lozano R, Michaud C, Ezzati M, et al. Years lived  
934 with disability (YLDs) for 1160 sequelae of 289 diseases and injuries 1990-2010: a  
935 systematic analysis for the Global Burden of Disease Study 2010. *Lancet*.  
936 2012;380(9859):2163-96. Epub 2012/12/19. doi: 10.1016/S0140-6736(12)61729-2.  
937 PubMed PMID: 23245607.

- 938 7. Selin LK, Santolucito PA, Pinto AK, Szomolanyi-Tsuda E, Welsh RM. Innate  
939 immunity to viruses: control of vaccinia virus infection by gamma delta T cells. *J Immunol.*  
940 2001;166(11):6784-94. PubMed PMID: 11359837.
- 941 8. Agrati C, Castilletti C, De Santis R, Cimini E, Bordi L, Malkovsky M, et al.  
942 Interferon-gamma-mediated antiviral immunity against orthopoxvirus infection is provided  
943 by gamma delta T cells. *J Infect Dis.* 2006;193(11):1606-7; author reply 7-8. doi:  
944 10.1086/503438. PubMed PMID: 16652291.
- 945 9. Welsh RM, Lin MY, Lohman BL, Varga SM, Zarozinski CC, Selin LK. Alpha beta  
946 and gamma delta T-cell networks and their roles in natural resistance to viral infections.  
947 *Immunol Rev.* 1997;159:79-93. PubMed PMID: 9416504.
- 948 10. Bukowski JF, Morita CT, Brenner MB. Recognition and destruction of virus-  
949 infected cells by human gamma-delta CTL. *Journal of Immunology.* 1994;153:5133-40.
- 950 11. Fischer MA, Davies ML, Reider IE, Heipertz EL, Epler MR, Sei JJ, et al. CD11b(+),  
951 Ly6G(+) cells produce type I interferon and exhibit tissue protective properties following  
952 peripheral virus infection. *PLoS Pathog.* 2011;7(11):e1002374. doi:  
953 10.1371/journal.ppat.1002374. PubMed PMID: 22102816; PubMed Central PMCID:  
954 PMC3213107.
- 955 12. Davies ML, Parekh NJ, Kaminsky LW, Soni C, Reider IE, Krouse TE, et al. A  
956 systemic macrophage response is required to contain a peripheral poxvirus infection.  
957 *PLoS Pathog.* 2017;13(6):e1006435. doi: 10.1371/journal.ppat.1006435. PubMed PMID:  
958 28614386; PubMed Central PMCID: PMCPMC5484545.
- 959 13. Parekh NJ, Krouse TE, Reider IE, Hobbs RP, Ward BM, Norbury CC. Type I  
960 interferon-dependent CCL4 is induced by a cGAS/STING pathway that bypasses viral

- 961 inhibition and protects infected tissue, independent of viral burden. *PLoS Pathog.*  
962 2019;15(10):e1007778. doi: 10.1371/journal.ppat.1007778. PubMed PMID: 31603920.
- 963 14. Garman RD, Ko JL, Vulpe CD, Raulet DH. T-cell receptor variable region gene  
964 usage in T-cell populations. *Proc Natl Acad Sci U S A.* 1986;83(11):3987-91. Epub  
965 1986/06/01. doi: 10.1073/pnas.83.11.3987. PubMed PMID: 3487085; PubMed Central  
966 PMCID: PMCPMC323650.
- 967 15. O'Brien RL, Born WK. Dermal gammadelta T cells--What have we learned? *Cell*  
968 *Immunol.* 2015;296(1):62-9. Epub 2015/02/05. doi: 10.1016/j.cellimm.2015.01.011.  
969 PubMed PMID: 25649119; PubMed Central PMCID: PMCPMC4466165.
- 970 16. Cai Y, Xue F, Fleming C, Yang J, Ding C, Ma Y, et al. Differential developmental  
971 requirement and peripheral regulation for dermal Vgamma4 and Vgamma6T17 cells in  
972 health and inflammation. *Nat Commun.* 2014;5:3986. Epub 2014/06/10. doi:  
973 10.1038/ncomms4986. PubMed PMID: 24909159; PubMed Central PMCID:  
974 PMCPMC4068267.
- 975 17. Tuero I, Venzon D, Robert-Guroff M. Mucosal and Systemic gammadelta+ T Cells  
976 Associated with Control of Simian Immunodeficiency Virus Infection. *J Immunol.*  
977 2016;197(12):4686-95. Epub 2016/11/07. doi: 10.4049/jimmunol.1600579. PubMed  
978 PMID: 27815422; PubMed Central PMCID: PMCPMC5136305.
- 979 18. Agrati C, Castilletti C, Cimini E, Romanelli A, Lapa D, Quartu S, et al. Antiviral  
980 activity of human Vdelta2 T-cells against WNV includes both cytolytic and non-cytolytic  
981 mechanisms. *New Microbiol.* 2016;39(2):139-42. Epub 2016/05/20. PubMed PMID:  
982 27196553.

- 983 19. Liu W, Moussawi M, Roberts B, Boyson JE, Huber SA. Cross-regulation of T  
984 regulatory-cell response after coxsackievirus B3 infection by NKT and gammadelta T cells  
985 in the mouse. *Am J Pathol.* 2013;183(2):441-9. Epub 2013/06/12. doi:  
986 10.1016/j.ajpath.2013.04.015. PubMed PMID: 23746656; PubMed Central PMCID:  
987 PMCPMC3730787.
- 988 20. Qin G, Liu Y, Zheng J, Xiang Z, Ng IH, Malik Peiris JS, et al. Phenotypic and  
989 functional characterization of human gammadelta T-cell subsets in response to influenza  
990 A viruses. *J Infect Dis.* 2012;205(11):1646-53. Epub 2012/03/30. doi:  
991 10.1093/infdis/jis253. PubMed PMID: 22457284.
- 992 21. Ribot JC, Chaves-Ferreira M, d'Orey F, Wencker M, Goncalves-Sousa N, Decalf  
993 J, et al. Cutting edge: adaptive versus innate receptor signals selectively control the pool  
994 sizes of murine IFN-gamma- or IL-17-producing gammadelta T cells upon infection.  
995 *Journal of immunology.* 2010;185(11):6421-5. Epub 2010/11/03. doi:  
996 10.4049/jimmunol.1002283. PubMed PMID: 21037088.
- 997 22. Lochner M, Peduto L, Cherrier M, Sawa S, Langa F, Varona R, et al. In vivo  
998 equilibrium of proinflammatory IL-17+ and regulatory IL-10+ Foxp3+ RORgamma t+ T  
999 cells. *J Exp Med.* 2008;205(6):1381-93. Epub 2008/05/28. doi: 10.1084/jem.20080034.  
1000 PubMed PMID: 18504307; PubMed Central PMCID: PMCPMC2413035.
- 1001 23. Lockhart E, Green AM, Flynn JL. IL-17 production is dominated by gammadelta T  
1002 cells rather than CD4 T cells during *Mycobacterium tuberculosis* infection. *J Immunol.*  
1003 2006;177(7):4662-9. Epub 2006/09/20. doi: 10.4049/jimmunol.177.7.4662. PubMed  
1004 PMID: 16982905.

- 1005 24. MacLeod AS, Hemmers S, Garijo O, Chabod M, Mowen K, Witherden DA, et al.  
1006 Dendritic epidermal T cells regulate skin antimicrobial barrier function. *The Journal of*  
1007 *clinical investigation*. 2013;123(10):4364-74. Epub 2013/09/21. doi: 10.1172/JCI70064.  
1008 PubMed PMID: 24051381; PubMed Central PMCID: PMC3784546.
- 1009 25. Cho JS, Pietras EM, Garcia NC, Ramos RI, Farzam DM, Monroe HR, et al. IL-17  
1010 is essential for host defense against cutaneous *Staphylococcus aureus* infection in mice.  
1011 *J Clin Invest*. 2010;120(5):1762-73. Epub 2010/04/07. doi: 10.1172/JCI40891. PubMed  
1012 PMID: 20364087; PubMed Central PMCID: PMCPMC2860944.
- 1013 26. Rani M, Zhang Q, Scherer MR, Cap AP, Schwacha MG. Activated skin  
1014 gammadelta T-cells regulate T-cell infiltration of the wound site after burn. *Innate Immun*.  
1015 2015;21(2):140-50. Epub 2014/01/15. doi: 10.1177/1753425913519350. PubMed PMID:  
1016 24412847.
- 1017 27. Petrovic J, Silva JR, Bannerman CA, Segal JP, Marshall AS, Haird CM, et al.  
1018 gammadelta T Cells Modulate Myeloid Cell Recruitment but Not Pain During Peripheral  
1019 Inflammation. *Front Immunol*. 2019;10:473. Epub 2019/04/03. doi:  
1020 10.3389/fimmu.2019.00473. PubMed PMID: 30936874; PubMed Central PMCID:  
1021 PMCPMC6431614.
- 1022 28. Li H, Xiang Z, Feng T, Li J, Liu Y, Fan Y, et al. Human Vgamma9Vdelta2-T cells  
1023 efficiently kill influenza virus-infected lung alveolar epithelial cells. *Cell Mol Immunol*.  
1024 2013;10(2):159-64. Epub 2013/01/29. doi: 10.1038/cmi.2012.70. PubMed PMID:  
1025 23353835; PubMed Central PMCID: PMCPMC4003054.
- 1026 29. Zhao Y, Lin L, Xiao Z, Li M, Wu X, Li W, et al. Protective Role of gammadelta T  
1027 Cells in Different Pathogen Infections and Its Potential Clinical Application. *J Immunol*

- 1028 Res. 2018;2018:5081634. Epub 2018/08/18. doi: 10.1155/2018/5081634. PubMed PMID:  
1029 30116753; PubMed Central PMCID: PMC6079409.
- 1030 30. Komori HK, Witherden DA, Kelly R, Sendaydiego K, Jameson JM, Teyton L, et al.  
1031 Cutting edge: dendritic epidermal gammadelta T cell ligands are rapidly and locally  
1032 expressed by keratinocytes following cutaneous wounding. J Immunol.  
1033 2012;188(7):2972-6. Epub 2012/03/07. doi: 10.4049/jimmunol.1100887. PubMed PMID:  
1034 22393149; PubMed Central PMCID: PMC6079409.
- 1035 31. Girardi M, Lewis JM, Filler RB, Hayday AC, Tigelaar RE. Environmentally  
1036 responsive and reversible regulation of epidermal barrier function by gammadelta T cells.  
1037 J Invest Dermatol. 2006;126(4):808-14. Epub 2006/01/28. doi: 10.1038/sj.jid.5700120.  
1038 PubMed PMID: 16439970.
- 1039 32. Jameson JM, Cauvi G, Witherden DA, Havran WL. A keratinocyte-responsive  
1040 gamma delta TCR is necessary for dendritic epidermal T cell activation by damaged  
1041 keratinocytes and maintenance in the epidermis. J Immunol. 2004;172(6):3573-9. Epub  
1042 2004/03/09. doi: 10.4049/jimmunol.172.6.3573. PubMed PMID: 15004158.
- 1043 33. Whang MI, Guerra N, Raulet DH. Costimulation of dendritic epidermal gammadelta  
1044 T cells by a new NKG2D ligand expressed specifically in the skin. J Immunol.  
1045 2009;182(8):4557-64. Epub 2009/04/04. doi: 10.4049/jimmunol.0802439. PubMed PMID:  
1046 19342629; PubMed Central PMCID: PMC3001286.
- 1047 34. Anderson LS, Yu S, Rivara KR, Reynolds MB, Hernandez AA, Wu X, et al.  
1048 CCR6(+) gammadelta T Cells Home to Skin Wounds and Restore Normal Wound Healing  
1049 in CCR6-Deficient Mice. J Invest Dermatol. 2019;139(9):2061-4 e2. Epub 2019/04/03.

- 1050 doi: 10.1016/j.jid.2019.02.032. PubMed PMID: 30935975; PubMed Central PMCID:  
1051 PMCPMC6708754.
- 1052 35. Bonneville M. Semaphorins: new cues for skin healing by gammadelta T cells.  
1053 Immunity. 2012;37(2):194-6. Epub 2012/08/28. doi: 10.1016/j.immuni.2012.08.003.  
1054 PubMed PMID: 22921116.
- 1055 36. Toulon A, Breton L, Taylor KR, Tenenhaus M, Bhavsar D, Lanigan C, et al. A role  
1056 for human skin-resident T cells in wound healing. J Exp Med. 2009;206(4):743-50. Epub  
1057 2009/03/25. doi: 10.1084/jem.20081787. PubMed PMID: 19307328; PubMed Central  
1058 PMCID: PMCPMC2715110.
- 1059 37. Li Y, Wu J, Luo G, He W. Functions of Vgamma4 T Cells and Dendritic Epidermal  
1060 T Cells on Skin Wound Healing. Front Immunol. 2018;9:1099. Epub 2018/06/20. doi:  
1061 10.3389/fimmu.2018.01099. PubMed PMID: 29915573; PubMed Central PMCID:  
1062 PMCPMC5994537.
- 1063 38. Krishnan S, Prise IE, Wemyss K, Schenck LP, Bridgeman HM, McClure FA, et al.  
1064 Amphiregulin-producing gammadelta T cells are vital for safeguarding oral barrier  
1065 immune homeostasis. Proc Natl Acad Sci U S A. 2018;115(42):10738-43. Epub  
1066 2018/10/04. doi: 10.1073/pnas.1802320115. PubMed PMID: 30279177; PubMed Central  
1067 PMCID: PMCPMC6196490.
- 1068 39. Gay D, Kwon O, Zhang Z, Spata M, Plikus MV, Holler PD, et al. Fgf9 from dermal  
1069 gammadelta T cells induces hair follicle neogenesis after wounding. Nat Med.  
1070 2013;19(7):916-23. Epub 2013/06/04. doi: 10.1038/nm.3181. PubMed PMID: 23727932;  
1071 PubMed Central PMCID: PMCPMC4054871.



- 1072 40. Xu P, Fu X, Xiao N, Guo Y, Pei Q, Peng Y, et al. Involvements of gammadelta T  
1073 Lymphocytes in Acute and Chronic Skin Wound Repair. *Inflammation*. 2017;40(4):1416-  
1074 27. Epub 2017/05/26. doi: 10.1007/s10753-017-0585-6. PubMed PMID: 28540539.
- 1075 41. Havran WL, Jameson JM. Epidermal T cells and wound healing. *J Immunol*.  
1076 2010;184(10):5423-8. Epub 2010/05/21. doi: 10.4049/jimmunol.0902733. PubMed PMID:  
1077 20483798; PubMed Central PMCID: PMCPMC2944652.
- 1078 42. Jameson J, Havran WL. Skin gammadelta T-cell functions in homeostasis and  
1079 wound healing. *Immunol Rev*. 2007;215:114-22. Epub 2007/02/13. doi: 10.1111/j.1600-  
1080 065X.2006.00483.x. PubMed PMID: 17291283.
- 1081 43. Macleod AS, Havran WL. Functions of skin-resident gammadelta T cells. *Cell Mol*  
1082 *Life Sci*. 2011;68(14):2399-408. Epub 2011/05/12. doi: 10.1007/s00018-011-0702-x.  
1083 PubMed PMID: 21560071; PubMed Central PMCID: PMCPMC3123394.
- 1084 44. Jameson J, Ugarte K, Chen N, Yachi P, Fuchs E, Boismenu R, et al. A role for skin  
1085 gammadelta T cells in wound repair. *Science*. 2002;296(5568):747-9. Epub 2002/04/27.  
1086 doi: 10.1126/science.1069639. PubMed PMID: 11976459.
- 1087 45. Khairallah C, Chu TH, Sheridan BS. Tissue Adaptations of Memory and Tissue-  
1088 Resident Gamma Delta T Cells. *Front Immunol*. 2018;9:2636. Epub 2018/12/13. doi:  
1089 10.3389/fimmu.2018.02636. PubMed PMID: 30538697; PubMed Central PMCID:  
1090 PMCPMC6277633.
- 1091 46. Serhan CN, Yacoubian S, Yang R. Anti-inflammatory and proresolving lipid  
1092 mediators. *Annual review of pathology*. 2008;3:279-312. doi:  
1093 10.1146/annurev.pathmechdis.3.121806.151409. PubMed PMID: 18233953; PubMed  
1094 Central PMCID: PMC2739396.

- 1095 47. Serhan CN, Chiang N, Van Dyke TE. Resolving inflammation: dual anti-  
1096 inflammatory and pro-resolution lipid mediators. *Nat Rev Immunol.* 2008;8(5):349-61. doi:  
1097 10.1038/nri2294. PubMed PMID: 18437155; PubMed Central PMCID: PMC2744593.
- 1098 48. Tikoo S, Jain R, Kurz AR, Weninger W. The lymphoid cell network in the skin.  
1099 *Immunol Cell Biol.* 2018;96(5):485-96. Epub 2018/02/20. doi: 10.1111/imcb.12026.  
1100 PubMed PMID: 29457268.
- 1101 49. Lloyd JB, Gill HS, Haig DM, Husband AJ. In vivo T-cell subset depletion suggests  
1102 that CD4+ T-cells and a humoral immune response are important for the elimination of  
1103 orf virus from the skin of sheep. *Vet Immunol Immunopathol.* 2000;74(3-4):249-62. Epub  
1104 2000/05/10. doi: 10.1016/s0165-2427(00)00178-1. PubMed PMID: 10802292.
- 1105 50. Worku S, Gorse GJ, Belshe RB, Hoft DF. Canarypox vaccines induce antigen-  
1106 specific human gammadelta T cells capable of interferon-gamma production. *J Infect Dis.*  
1107 2001;184(5):525-32. Epub 2001/07/28. doi: 10.1086/322792. PubMed PMID: 11474428.
- 1108 51. Anderson IE, Reid HW, Nettleton PF, McInnes CJ, Haig DM. Detection of cellular  
1109 cytokine mRNA expression during orf virus infection in sheep: differential interferon-  
1110 gamma mRNA expression by cells in primary versus reinfection skin lesions. *Vet Immunol*  
1111 *Immunopathol.* 2001;83(3-4):161-76. Epub 2001/12/04. doi: 10.1016/s0165-  
1112 2427(01)00388-9. PubMed PMID: 11730927.
- 1113 52. Gulbahar MY, Davis WC, Yuksel H, Cabalar M. Immunohistochemical evaluation  
1114 of inflammatory infiltrate in the skin and lung of lambs naturally infected with sheeppox  
1115 virus. *Vet Pathol.* 2006;43(1):67-75. Epub 2006/01/13. doi: 10.1354/vp.43-1-67. PubMed  
1116 PMID: 16407491.

- 1117 53. Gierynska M, Pawlak E, Schollenberger A, Cespedes IS. Dendritic epidermal T  
1118 cells: their role in the early phase of ectromelia virus infection. *Postepy Hig Med Dosw*  
1119 (Online). 2009;63:369-76. Epub 2009/09/03. PubMed PMID: 19724077.
- 1120 54. Jacobs N, Chen RA, Gubser C, Najarro P, Smith GL. Intradermal immune  
1121 response after infection with Vaccinia virus. *J Gen Virol*. 2006;87(5):1157-61. PubMed  
1122 PMID: 16603516.
- 1123 55. Hickman HD, Reynoso GV, Ngudiankama BF, Cush SS, Gibbs J, Bennink JR, et  
1124 al. CXCR3 chemokine receptor enables local CD8(+) T cell migration for the destruction  
1125 of virus-infected cells. *Immunity*. 2015;42(3):524-37. doi: 10.1016/j.immuni.2015.02.009.  
1126 PubMed PMID: 25769612; PubMed Central PMCID: PMC4365427.
- 1127 56. Hickman HD, Li L, Reynoso GV, Rubin EJ, Skon CN, Mays JW, et al. Chemokines  
1128 control naive CD8+ T cell selection of optimal lymph node antigen presenting cells. *The*  
1129 *Journal of experimental medicine*. 2011;208(12):2511-24. Epub 2011/11/02. doi:  
1130 10.1084/jem.20102545. PubMed PMID: 22042976; PubMed Central PMCID:  
1131 PMC3256957.
- 1132 57. Vantourout P, Hayday A. Six-of-the-best: unique contributions of gammadelta T  
1133 cells to immunology. *Nat Rev Immunol*. 2013;13(2):88-100. Epub 2013/01/26. doi:  
1134 10.1038/nri3384. PubMed PMID: 23348415; PubMed Central PMCID:  
1135 PMC3951794.
- 1136 58. Mullbacher A, Waring P, Tha Hla R, Tran T, Chin S, Stehle T, et al. Granzymes  
1137 are the essential downstream effector molecules for the control of primary virus infections  
1138 by cytolytic leukocytes. *Proc Natl Acad Sci U S A*. 1999;96(24):13950-5. PubMed PMID:  
1139 10570179.

- 1140 59. Hickman HD, Reynoso GV, Ngudiankama BF, Rubin EJ, Magadan JG, Cush SS,  
1141 et al. Anatomically restricted synergistic antiviral activities of innate and adaptive immune  
1142 cells in the skin. *Cell host & microbe*. 2013;13(2):155-68. Epub 2013/02/19. doi:  
1143 10.1016/j.chom.2013.01.004. PubMed PMID: 23414756; PubMed Central PMCID:  
1144 PMC3591514.
- 1145 60. Betts MR, Nason MC, West SM, De Rosa SC, Migueles SA, Abraham J, et al. HIV  
1146 nonprogressors preferentially maintain highly functional HIV-specific CD8+ T cells. *Blood*.  
1147 2006;107(12):4781-9. Epub 2006/02/10. doi: 10.1182/blood-2005-12-4818. PubMed  
1148 PMID: 16467198; PubMed Central PMCID: PMCPMC1895811.
- 1149 61. Davies ML, Sei JJ, Siciliano NA, Xu RH, Roscoe F, Sigal LJ, et al. MyD88-  
1150 dependent immunity to a natural model of vaccinia virus infection does not involve Toll-  
1151 like receptor 2. *J Virol*. 2014;88(6):3557-67. doi: 10.1128/JVI.02776-13. PubMed PMID:  
1152 24403581; PubMed Central PMCID: PMC3957935.
- 1153 62. Scheynius A, Fransson J, Johansson C, Hammar H, Baker B, Fry L, et al.  
1154 Expression of interferon-gamma receptors in normal and psoriatic skin. *J Invest Dermatol*.  
1155 1992;98(2):255-8. Epub 1992/02/01. doi: 10.1111/1523-1747.ep12556086. PubMed  
1156 PMID: 1531061.
- 1157 63. Shin JM, Choi DK, Sohn KC, Koh JW, Lee YH, Seo YJ, et al. Induction of alopecia  
1158 areata in C3H/HeJ mice using polyinosinic-polycytidylic acid (poly[I:C]) and interferon-  
1159 gamma. *Sci Rep*. 2018;8(1):12518. Epub 2018/08/23. doi: 10.1038/s41598-018-30997-  
1160 3. PubMed PMID: 30131581; PubMed Central PMCID: PMCPMC6104095.
- 1161 64. Karupiah G, Blanden RV, Ramshaw IA. Interferon gamma is involved in the  
1162 recovery of athymic nude mice from recombinant vaccinia virus/interleukin 2 infection. *J*

- 1163 Exp Med. 1990;172(5):1495-503. PubMed PMID: 2121889; PubMed Central PMCID:  
1164 PMCPMC2188664.
- 1165 65. Jensen KD, Su X, Shin S, Li L, Youssef S, Yamasaki S, et al. Thymic selection  
1166 determines gammadelta T cell effector fate: antigen-naive cells make interleukin-17 and  
1167 antigen-experienced cells make interferon gamma. Immunity. 2008;29(1):90-100. Epub  
1168 2008/07/01. doi: 10.1016/j.immuni.2008.04.022. PubMed PMID: 18585064; PubMed  
1169 Central PMCID: PMCPMC2601709.
- 1170 66. Sumaria N, Roediger B, Ng LG, Qin J, Pinto R, Cavanagh LL, et al. Cutaneous  
1171 immunosurveillance by self-renewing dermal gammadelta T cells. J Exp Med.  
1172 2011;208(3):505-18. Epub 2011/02/23. doi: 10.1084/jem.20101824. PubMed PMID:  
1173 21339323; PubMed Central PMCID: PMCPMC3058585.
- 1174 67. Pantelyushin S, Haak S, Ingold B, Kulig P, Heppner FL, Navarini AA, et al.  
1175 Rorgammat+ innate lymphocytes and gammadelta T cells initiate psoriasiform plaque  
1176 formation in mice. J Clin Invest. 2012;122(6):2252-6. Epub 2012/05/02. doi:  
1177 10.1172/JCI61862. PubMed PMID: 22546855; PubMed Central PMCID:  
1178 PMCPMC3366412.
- 1179 68. Cai Y, Shen X, Ding C, Qi C, Li K, Li X, et al. Pivotal role of dermal IL-17-producing  
1180 gammadelta T cells in skin inflammation. Immunity. 2011;35(4):596-610. Epub  
1181 2011/10/11. doi: 10.1016/j.immuni.2011.08.001. PubMed PMID: 21982596; PubMed  
1182 Central PMCID: PMCPMC3205267.
- 1183 69. Gray EE, Ramirez-Valle F, Xu Y, Wu S, Wu Z, Karjalainen KE, et al. Deficiency in  
1184 IL-17-committed Vgamma4(+) gammadelta T cells in a spontaneous Sox13-mutant  
1185 CD45.1(+) congenic mouse substrain provides protection from dermatitis. Nat Immunol.

- 1186 2013;14(6):584-92. Epub 2013/04/30. doi: 10.1038/ni.2585. PubMed PMID: 23624556;  
1187 PubMed Central PMCID: PMCPMC3660499.
- 1188 70. Gillitzer R, Goebeler M. Chemokines in cutaneous wound healing. *J Leukoc Biol.*  
1189 2001;69(4):513-21. Epub 2001/04/20. PubMed PMID: 11310836.
- 1190 71. Werner S, Grose R. Regulation of wound healing by growth factors and cytokines.  
1191 *Physiol Rev.* 2003;83(3):835-70. Epub 2003/07/05. doi: 10.1152/physrev.2003.83.3.835.  
1192 PubMed PMID: 12843410.
- 1193 72. Eming SA, Krieg T, Davidson JM. Inflammation in wound repair: molecular and  
1194 cellular mechanisms. *J Invest Dermatol.* 2007;127(3):514-25. Epub 2007/02/15. doi:  
1195 10.1038/sj.jid.5700701. PubMed PMID: 17299434.
- 1196 73. Penn JW, Grobbelaar AO, Rolfe KJ. The role of the TGF-beta family in wound  
1197 healing, burns and scarring: a review. *Int J Burns Trauma.* 2012;2(1):18-28. Epub  
1198 2012/08/29. PubMed PMID: 22928164; PubMed Central PMCID: PMCPMC3415964.
- 1199 74. Liarte S, Bernabe-Garcia A, Nicolas FJ. Role of TGF-beta in Skin Chronic Wounds:  
1200 A Keratinocyte Perspective. *Cells.* 2020;9(2). Epub 2020/02/06. doi:  
1201 10.3390/cells9020306. PubMed PMID: 32012802; PubMed Central PMCID:  
1202 PMCPMC7072438.
- 1203 75. Savage AK, Liang HE, Locksley RM. The Development of Steady-State Activation  
1204 Hubs between Adult LT $\alpha$  ILC3s and Primed Macrophages in Small Intestine. *J Immunol.*  
1205 2017;199(5):1912-22. Epub 2017/07/28. doi: 10.4049/jimmunol.1700155. PubMed PMID:  
1206 28747343; PubMed Central PMCID: PMCPMC5568484.
- 1207 76. Madan R, Demircik F, Surianarayanan S, Allen JL, Divanovic S, Trompette A, et  
1208 al. Nonredundant roles for B cell-derived IL-10 in immune counter-regulation. *J Immunol.*

- 1209 2009;183(4):2312-20. Epub 2009/07/22. doi: 10.4049/jimmunol.0900185. PubMed PMID:  
1210 19620304; PubMed Central PMCID: PMCPMC2772089.
- 1211 77. Cush SS, Reynoso GV, Kamenyeva O, Bennink JR, Yewdell JW, Hickman HD.  
1212 Locally Produced IL-10 Limits Cutaneous Vaccinia Virus Spread. PLoS Pathog.  
1213 2016;12(3):e1005493. doi: 10.1371/journal.ppat.1005493. PubMed PMID: 26991092;  
1214 PubMed Central PMCID: PMCPMC4798720.
- 1215 78. Mirza R, DiPietro LA, Koh TJ. Selective and specific macrophage ablation is  
1216 detrimental to wound healing in mice. Am J Pathol. 2009;175(6):2454-62. doi:  
1217 10.2353/ajpath.2009.090248. PubMed PMID: 19850888; PubMed Central PMCID:  
1218 PMCPMC2789630.
- 1219 79. Lin Q, Fang D, Fang J, Ren X, Yang X, Wen F, et al. Impaired wound healing with  
1220 defective expression of chemokines and recruitment of myeloid cells in TLR3-deficient  
1221 mice. J Immunol. 2011;186(6):3710-7. Epub 2011/02/15. doi:  
1222 10.4049/jimmunol.1003007. PubMed PMID: 21317384.
- 1223 80. Gregorio J, Meller S, Conrad C, Di Nardo A, Homey B, Lauerma A, et al.  
1224 Plasmacytoid dendritic cells sense skin injury and promote wound healing through type I  
1225 interferons. The Journal of experimental medicine. 2010;207(13):2921-30. Epub  
1226 2010/12/01. doi: 10.1084/jem.20101102. PubMed PMID: 21115688; PubMed Central  
1227 PMCID: PMC3005239.
- 1228 81. Bhartiya D, Sklarsh JW, Maheshwari RK. Enhanced wound healing in animal  
1229 models by interferon and an interferon inducer. J Cell Physiol. 1992;150(2):312-9. doi:  
1230 10.1002/jcp.1041500214. PubMed PMID: 1734035.

- 1231 82. Daley JM, Thomay AA, Connolly MD, Reichner JS, Albina JE. Use of Ly6G-specific  
1232 monoclonal antibody to deplete neutrophils in mice. *J Leukoc Biol.* 2008;83(1):64-70.  
1233 PubMed PMID: 17884993.
- 1234 83. Goren I, Christen U, Pfeilschifter J, Frank S. A heterogeneous Ly-6B2(+) leukocyte  
1235 population consists of yet undescribed iNOS-expressing cell types in murine skin wounds.  
1236 *Nitric Oxide.* 2018;74:23-31. Epub 2018/01/23. doi: 10.1016/j.niox.2018.01.004. PubMed  
1237 PMID: 29355774.
- 1238 84. Dunnill C, Patton T, Brennan J, Barrett J, Dryden M, Cooke J, et al. Reactive  
1239 oxygen species (ROS) and wound healing: the functional role of ROS and emerging ROS-  
1240 modulating technologies for augmentation of the healing process. *Int Wound J.*  
1241 2017;14(1):89-96. Epub 2015/12/22. doi: 10.1111/iwj.12557. PubMed PMID: 26688157.
- 1242 85. Sutoh Y, Mohamed RH, Kasahara M. Origin and Evolution of Dendritic Epidermal  
1243 T Cells. *Front Immunol.* 2018;9:1059. Epub 2018/06/06. doi: 10.3389/fimmu.2018.01059.  
1244 PubMed PMID: 29868019; PubMed Central PMCID: PMC5960712.
- 1245 86. Woodward Davis AS, Bergsbaken T, Delaney MA, Bevan MJ. Dermal-resident  
1246 versus recruited gammadelta T cell response to cutaneous vaccinia virus infection. *J*  
1247 *Immunol.* 2015;194(5):2260-7. doi: 10.4049/jimmunol.1402438. PubMed PMID:  
1248 25609844; PubMed Central PMCID: PMC4340759.
- 1249 87. Ono T, Okamoto K, Nakashima T, Nitta T, Hori S, Iwakura Y, et al. IL-17-producing  
1250 gammadelta T cells enhance bone regeneration. *Nat Commun.* 2016;7:10928. Epub  
1251 2016/03/12. doi: 10.1038/ncomms10928. PubMed PMID: 26965320; PubMed Central  
1252 PMCID: PMC4792964.



- 1253 88. Griffin GK, Newton G, Tarrío ML, Bu DX, Maganto-Garcia E, Azcutia V, et al. IL-  
1254 17 and TNF- $\alpha$  sustain neutrophil recruitment during inflammation through synergistic  
1255 effects on endothelial activation. *J Immunol.* 2012;188(12):6287-99. Epub 2012/05/09.  
1256 doi: 10.4049/jimmunol.1200385. PubMed PMID: 22566565; PubMed Central PMCID:  
1257 PMCPMC3370121.
- 1258 89. Grice EA, Segre JA. The skin microbiome. *Nat Rev Microbiol.* 2011;9(4):244-53.  
1259 Epub 2011/03/17. doi: 10.1038/nrmicro2537. PubMed PMID: 21407241; PubMed Central  
1260 PMCID: PMCPMC3535073.
- 1261 90. Purzycka-Bohdan D, Szczerkowska-Dobosz A, Zablotna M, Wierzbicka J,  
1262 Piotrowska A, Zmijewski MA, et al. Assessment of Interleukin 16 Serum Levels and Skin  
1263 Expression in Psoriasis Patients in Correlation with Clinical Severity of the Disease. *PLoS*  
1264 *One.* 2016;11(10):e0165577. Epub 2016/10/28. doi: 10.1371/journal.pone.0165577.  
1265 PubMed PMID: 27788245; PubMed Central PMCID: PMCPMC5082815.
- 1266 91. Shibata S, Tada Y, Asano Y, Hau CS, Kato T, Saeki H, et al. Adiponectin regulates  
1267 cutaneous wound healing by promoting keratinocyte proliferation and migration via the  
1268 ERK signaling pathway. *J Immunol.* 2012;189(6):3231-41. Epub 2012/08/21. doi:  
1269 10.4049/jimmunol.1101739. PubMed PMID: 22904306.
- 1270 92. Rhodes KA, Andrew EM, Newton DJ, Tramonti D, Carding SR. A subset of IL-10-  
1271 producing  $\gamma\delta$  T cells protect the liver from Listeria-elicited, CD8(+) T cell-  
1272 mediated injury. *Eur J Immunol.* 2008;38(8):2274-83. Epub 2008/07/16. doi:  
1273 10.1002/eji.200838354. PubMed PMID: 18624301.

- 1274 93. Boniface K, Bernard FX, Garcia M, Gurney AL, Lecron JC, Morel F. IL-22 inhibits  
1275 epidermal differentiation and induces proinflammatory gene expression and migration of  
1276 human keratinocytes. *J Immunol.* 2005;174(6):3695-702. PubMed PMID: 15749908.
- 1277 94. Wise LM, Stuart GS, Real NC, Fleming SB, Mercer AA. Orf virus IL-10 accelerates  
1278 wound healing while limiting inflammation and scarring. *Wound Repair Regen.*  
1279 2014;22(3):356-67. Epub 2014/05/23. doi: 10.1111/wrr.12169. PubMed PMID:  
1280 24844335.
- 1281 95. Bodaan CJ, Wise LM, Wakelin KA, Stuart GS, Real NC, Mercer AA, et al. Short-  
1282 term treatment of equine wounds with orf virus IL-10 and VEGF-E dampens inflammation  
1283 and promotes repair processes without accelerating closure. *Wound Repair Regen.*  
1284 2016;24(6):966-80. Epub 2016/10/19. doi: 10.1111/wrr.12488. PubMed PMID:  
1285 27681311.
- 1286 96. Bennett JR, Lateef Z, Fleming SB, Mercer AA, Wise LM. Orf virus IL-10 reduces  
1287 monocyte, dendritic cell and mast cell recruitment to inflamed skin. *Virus Res.*  
1288 2016;213:230-7. Epub 2016/01/07. doi: 10.1016/j.virusres.2015.12.015. PubMed PMID:  
1289 26732486.
- 1290 97. Wise LM, Stuart GS, Jones NC, Fleming SB, Mercer AA. Orf Virus IL-10 and  
1291 VEGF-E Act Synergistically to Enhance Healing of Cutaneous Wounds in Mice. *J Clin*  
1292 *Med.* 2020;9(4). Epub 2020/04/16. doi: 10.3390/jcm9041085. PubMed PMID: 32290480;  
1293 PubMed Central PMCID: PMC7231296.
- 1294 98. Boniface K, Guignouard E, Pedretti N, Garcia M, Delwail A, Bernard FX, et al. A  
1295 role for T cell-derived interleukin 22 in psoriatic skin inflammation. *Clin Exp Immunol.*

1296 2007;150(3):407-15. Epub 2007/09/29. doi: 10.1111/j.1365-2249.2007.03511.x. PubMed  
1297 PMID: 17900301; PubMed Central PMCID: PMCPMC2219373.

1298 99. Ma HL, Liang S, Li J, Napierata L, Brown T, Benoit S, et al. IL-22 is required for  
1299 Th17 cell-mediated pathology in a mouse model of psoriasis-like skin inflammation. J Clin  
1300 Invest. 2008;118(2):597-607. Epub 2008/01/19. doi: 10.1172/JCI33263. PubMed PMID:  
1301 18202747; PubMed Central PMCID: PMCPMC2200300.

1302 100. Ahlfors H, Morrison PJ, Duarte JH, Li Y, Biro J, Tolaini M, et al. IL-22 fate reporter  
1303 reveals origin and control of IL-22 production in homeostasis and infection. J Immunol.  
1304 2014;193(9):4602-13. doi: 10.4049/jimmunol.1401244. PubMed PMID: 25261485;  
1305 PubMed Central PMCID: PMCPMC4201943.

1306 101. McGee HM, Schmidt BA, Booth CJ, Yancopoulos GD, Valenzuela DM, Murphy AJ,  
1307 et al. IL-22 promotes fibroblast-mediated wound repair in the skin. J Invest Dermatol.  
1308 2013;133(5):1321-9. doi: 10.1038/jid.2012.463. PubMed PMID: 23223145; PubMed  
1309 Central PMCID: PMCPMC3610794.

1310 102. Avitabile S, Odorisio T, Madonna S, Eyerich S, Guerra L, Eyerich K, et al.  
1311 Interleukin-22 Promotes Wound Repair in Diabetes by Improving Keratinocyte Pro-  
1312 Healing Functions. J Invest Dermatol. 2015;135(11):2862-70. Epub 2015/07/15. doi:  
1313 10.1038/jid.2015.278. PubMed PMID: 26168231.

1314 103. Kolumam G, Wu X, Lee WP, Hackney JA, Zavala-Solorio J, Gandham V, et al. IL-  
1315 22R Ligands IL-20, IL-22, and IL-24 Promote Wound Healing in Diabetic db/db Mice.  
1316 PLoS One. 2017;12(1):e0170639. doi: 10.1371/journal.pone.0170639. PubMed PMID:  
1317 28125663; PubMed Central PMCID: PMCPMC5268431 following competing interests: All  
1318 authors are current or previous employees of Genentech. Genentech has reviewed the

1319 manuscript, and may potentially file patents and develop therapies based on part of the  
1320 data in the manuscript. However, this does not alter our adherence to PLOS ONE policies  
1321 on sharing data and materials.

1322 104. Lerman G, Sharon M, Leibowitz-Amit R, Sidi Y, Avni D. The crosstalk between IL-  
1323 22 signaling and miR-197 in human keratinocytes. *PLoS One*. 2014;9(9):e107467. Epub  
1324 2014/09/11. doi: 10.1371/journal.pone.0107467. PubMed PMID: 25208211; PubMed  
1325 Central PMCID: PMCPMC4160297.

1326 105. Gimblet C, Loesche MA, Carvalho L, Carvalho EM, Grice EA, Artis D, et al. IL-22  
1327 Protects against Tissue Damage during Cutaneous Leishmaniasis. *PLoS One*.  
1328 2015;10(8):e0134698. Epub 2015/08/19. doi: 10.1371/journal.pone.0134698. PubMed  
1329 PMID: 26285207; PubMed Central PMCID: PMCPMC4540492.

1330 106. Itohara S, Mombaerts P, Lafaille J, Iacomini J, Nelson A, Clarke AR, et al. T cell  
1331 receptor delta gene mutant mice: independent generation of alpha beta T cells and  
1332 programmed rearrangements of gamma delta TCR genes. *Cell*. 1993;72(3):337-48.  
1333 PubMed PMID: 8381716.

1334 107. Norbury CC, Malide D, Gibbs JS, Bennink JR, Yewdell JW. Visualizing priming of  
1335 virus-specific CD8+ T cells by infected dendritic cells in vivo. *Nat Immunol*. 2002;3(3):265-  
1336 71. PubMed PMID: 11828323.

1337 108. Hersperger AR, Siciliano NA, DeHaven BC, Snook AE, Eisenlohr LC. Epithelial  
1338 immunization induces polyfunctional CD8+ T cells and optimal mousepox protection. *J*  
1339 *Viol*. 2014;88(16):9472-5. doi: 10.1128/JVI.01464-14. PubMed PMID: 24899206;  
1340 PubMed Central PMCID: PMCPMC4136261.

1341

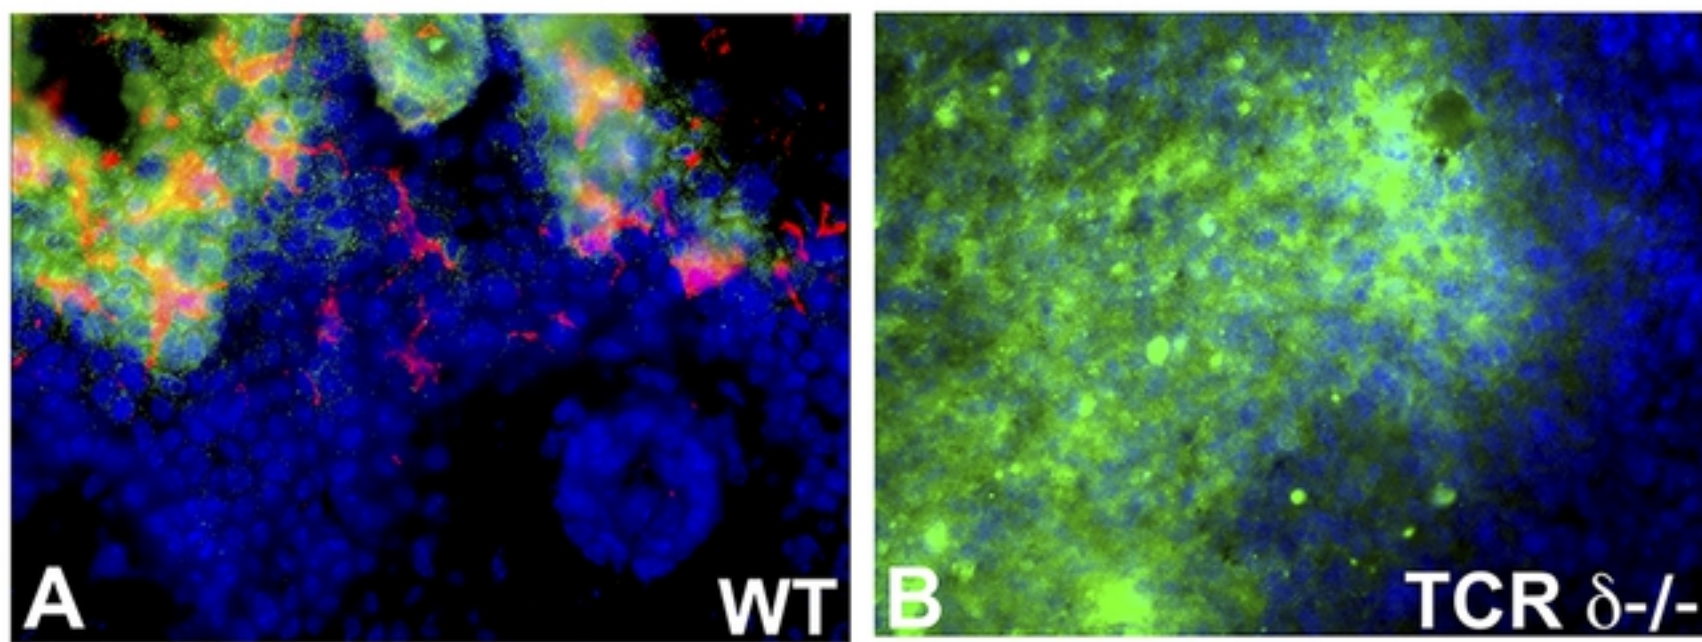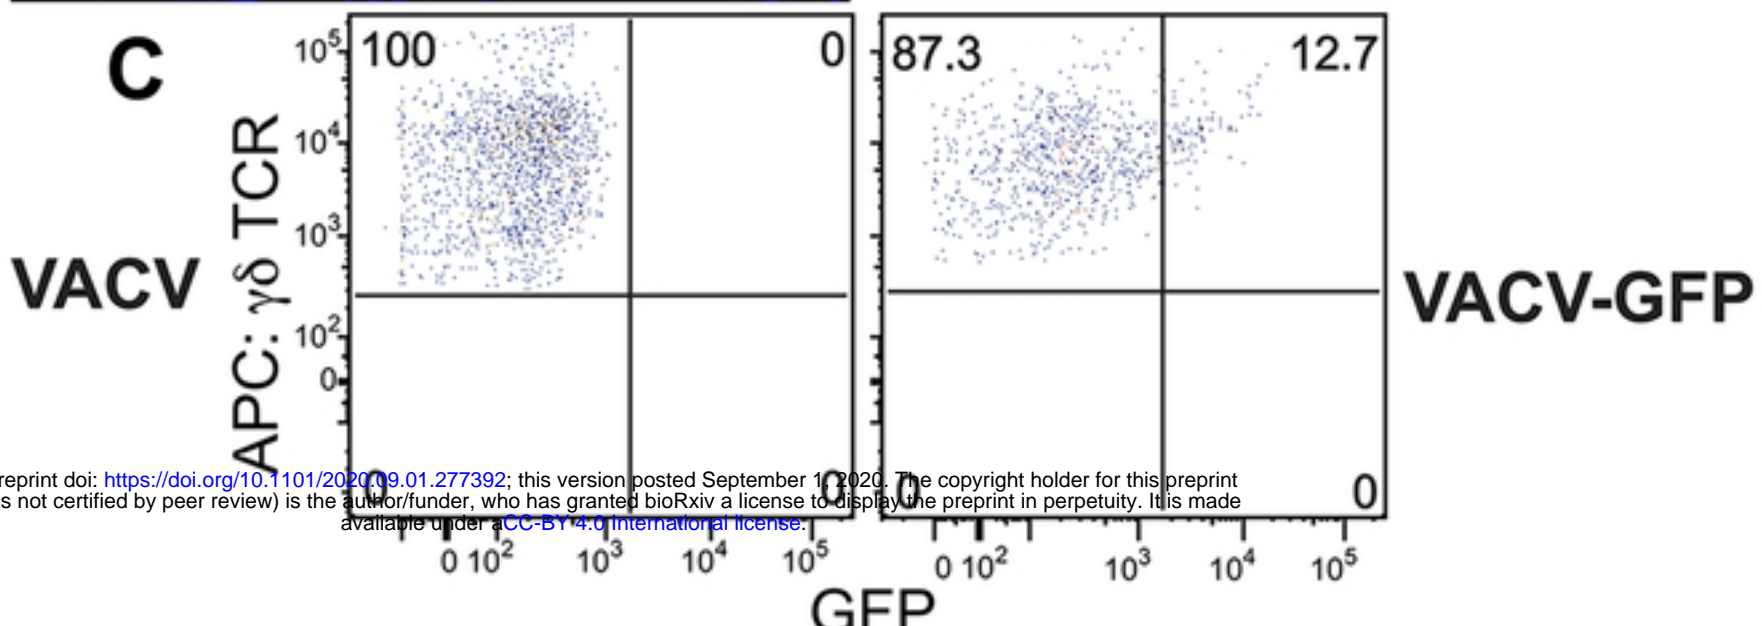

bioRxiv preprint doi: <https://doi.org/10.1101/2020.09.01.277392>; this version posted September 1, 2020. The copyright holder for this preprint (which was not certified by peer review) is the author/funder, who has granted bioRxiv a license to display the preprint in perpetuity. It is made available under aCC-BY 4.0 International license.

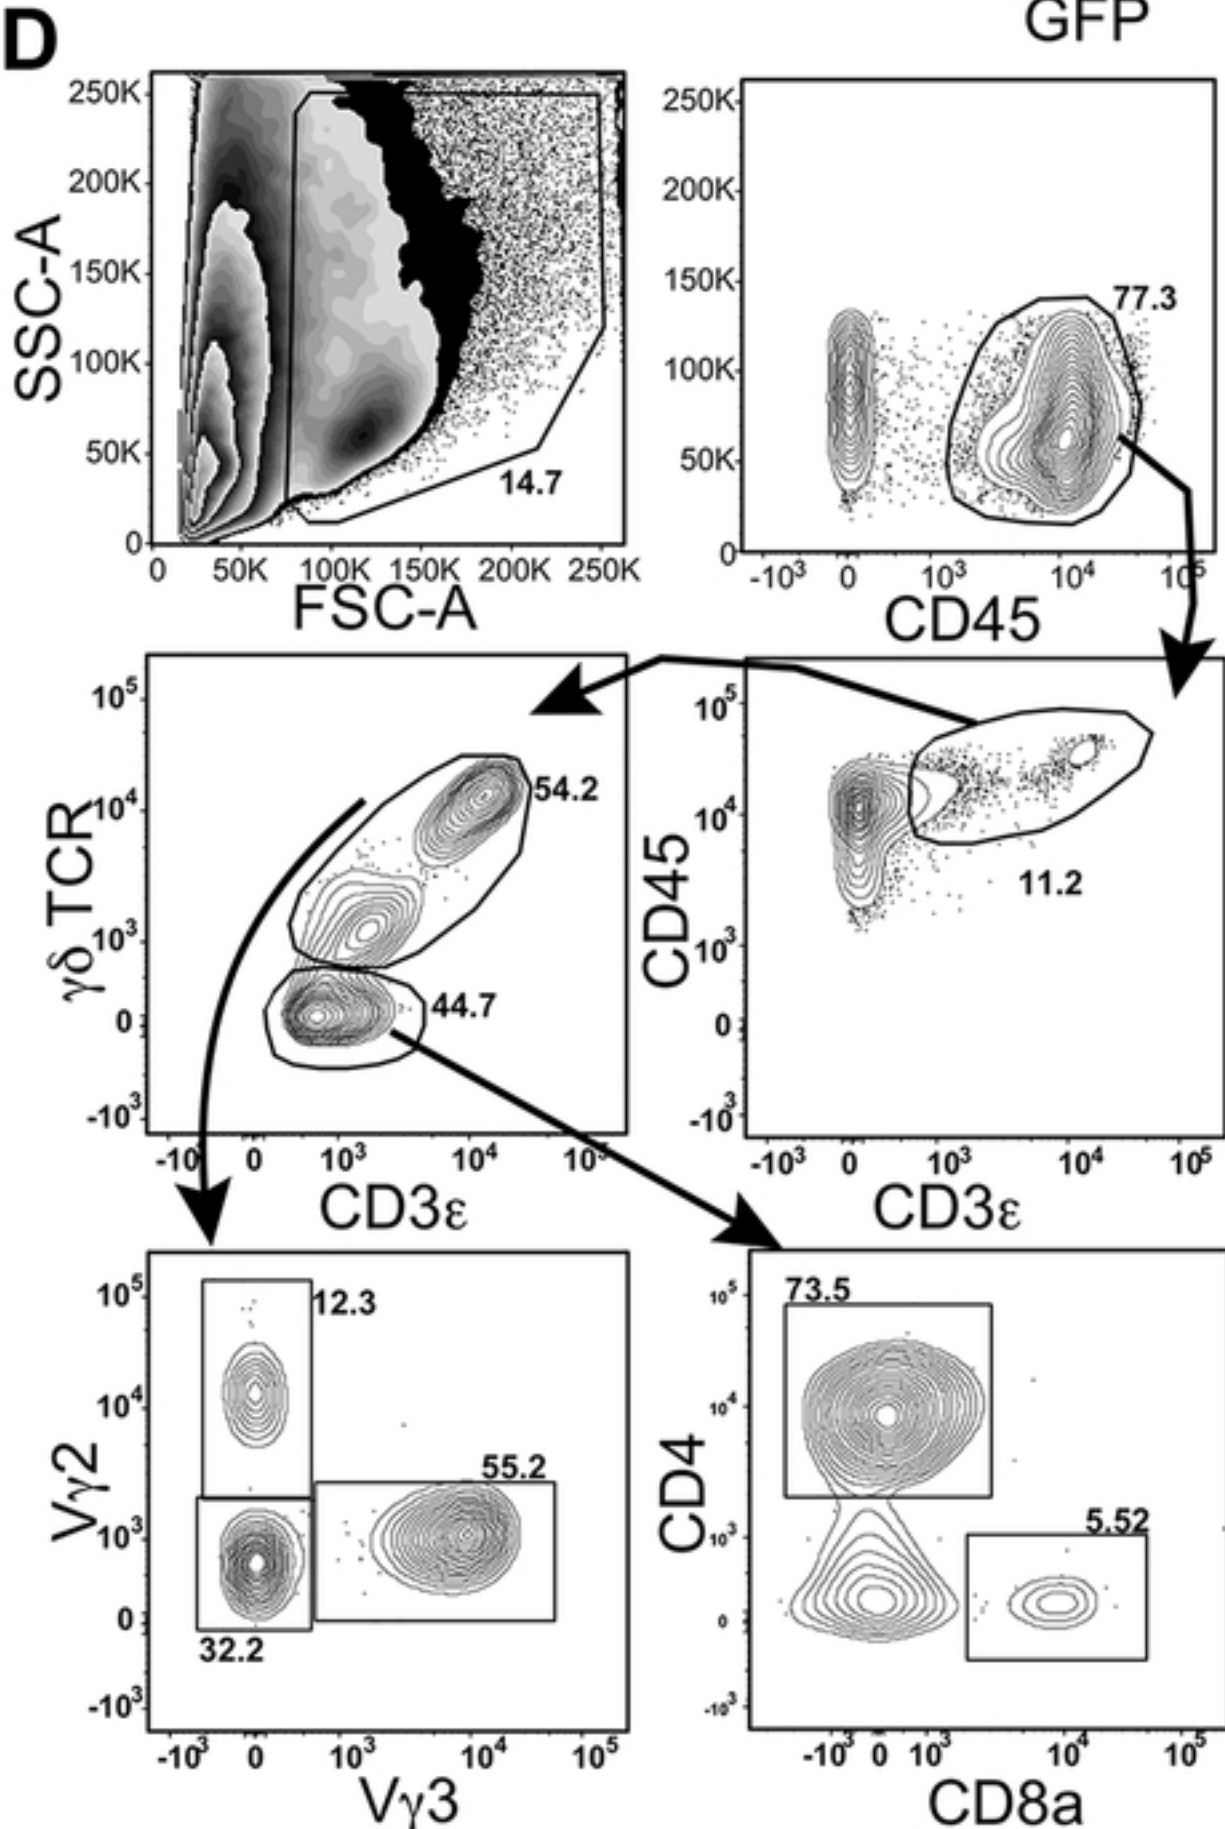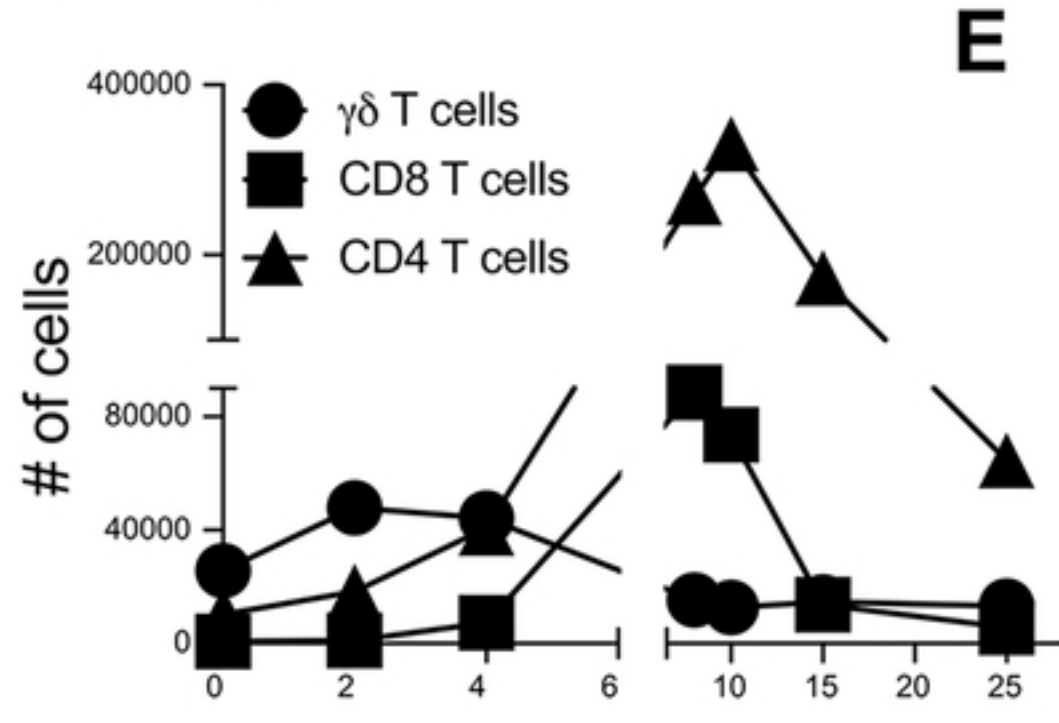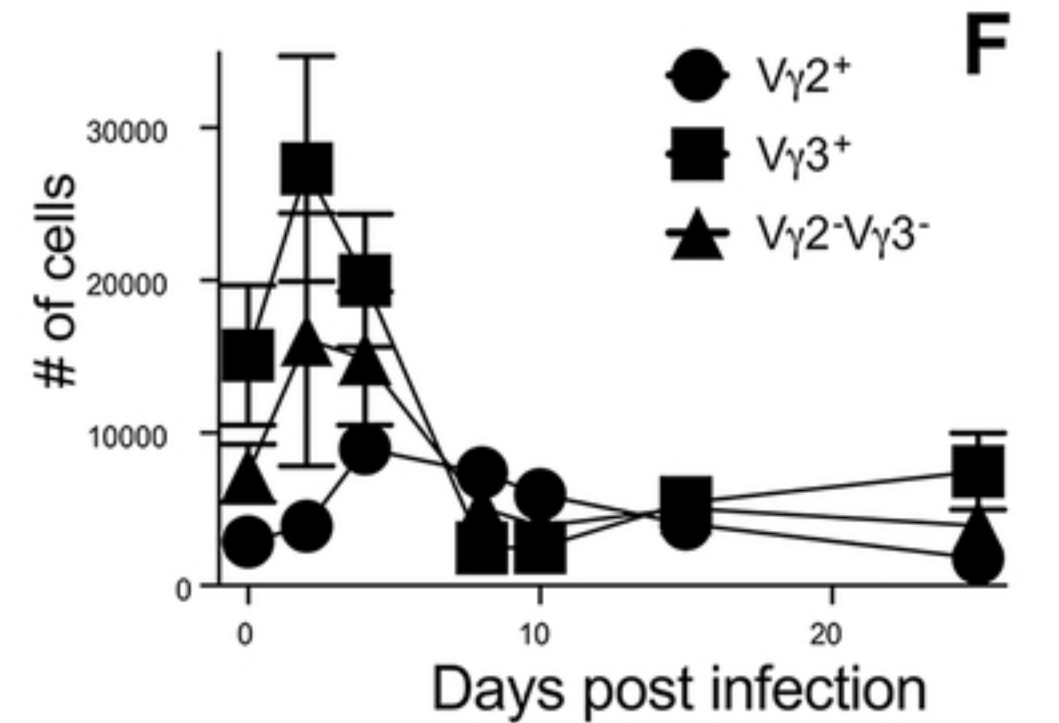

Figure 1

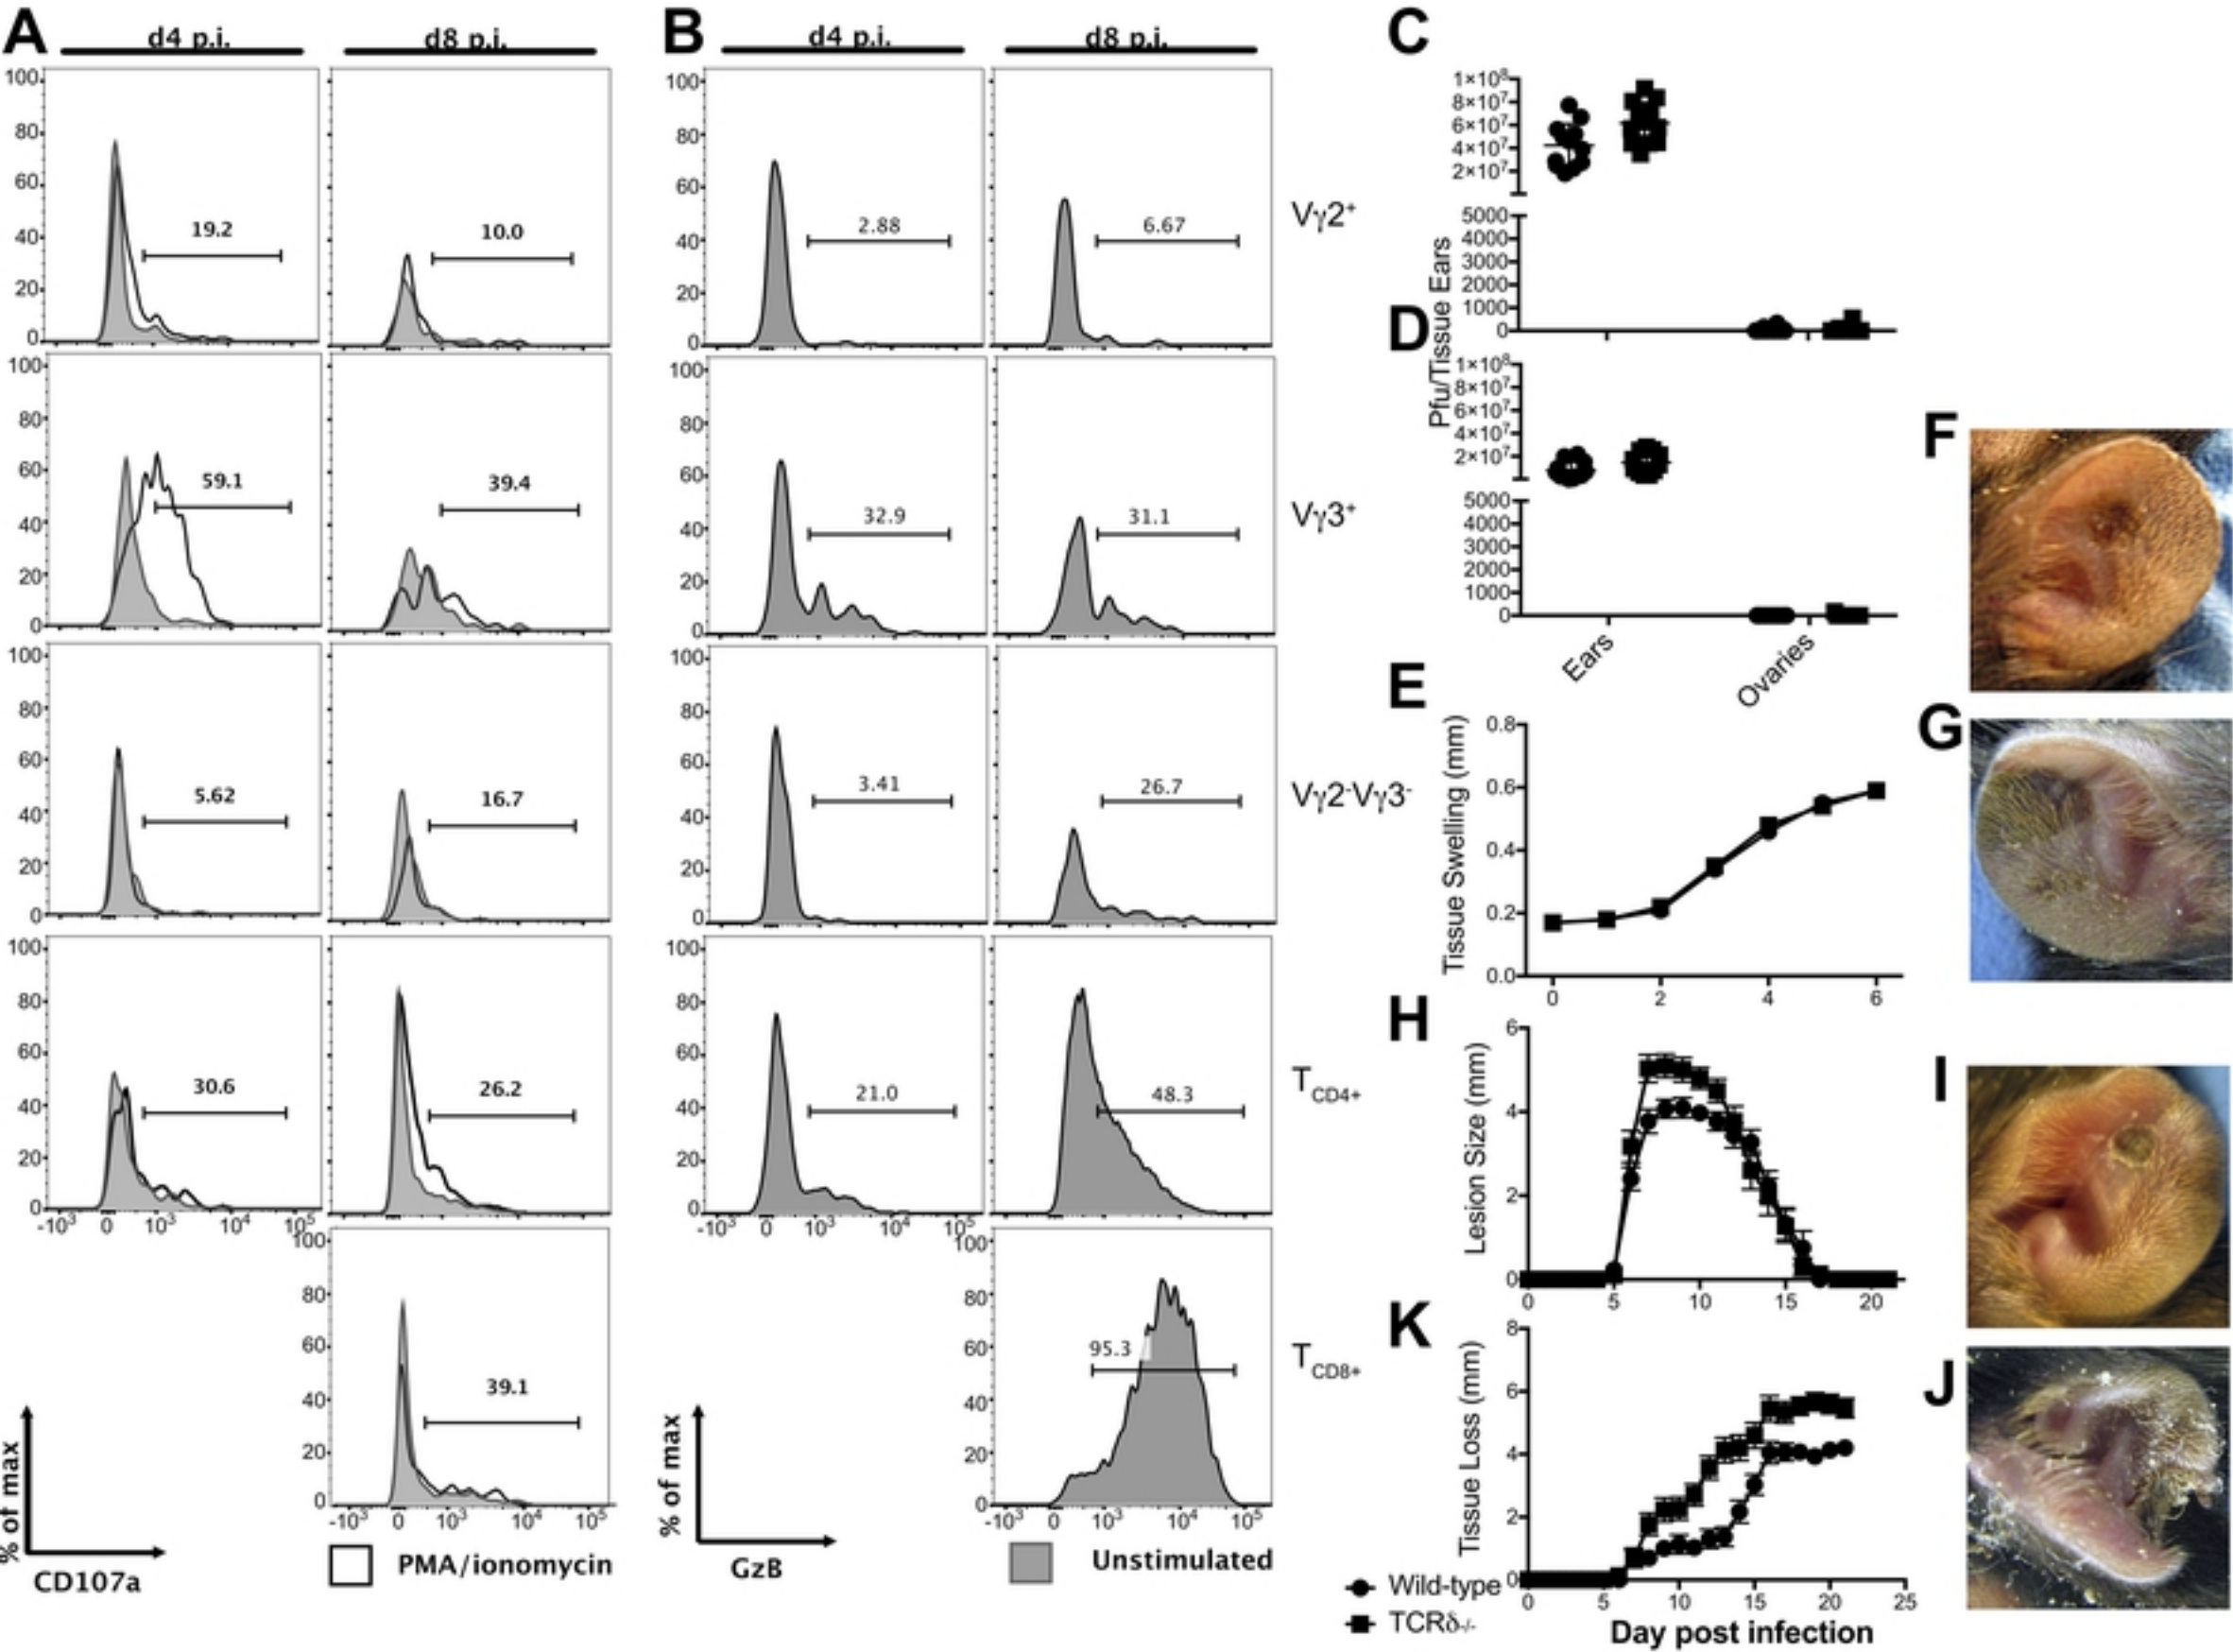

Figure 2

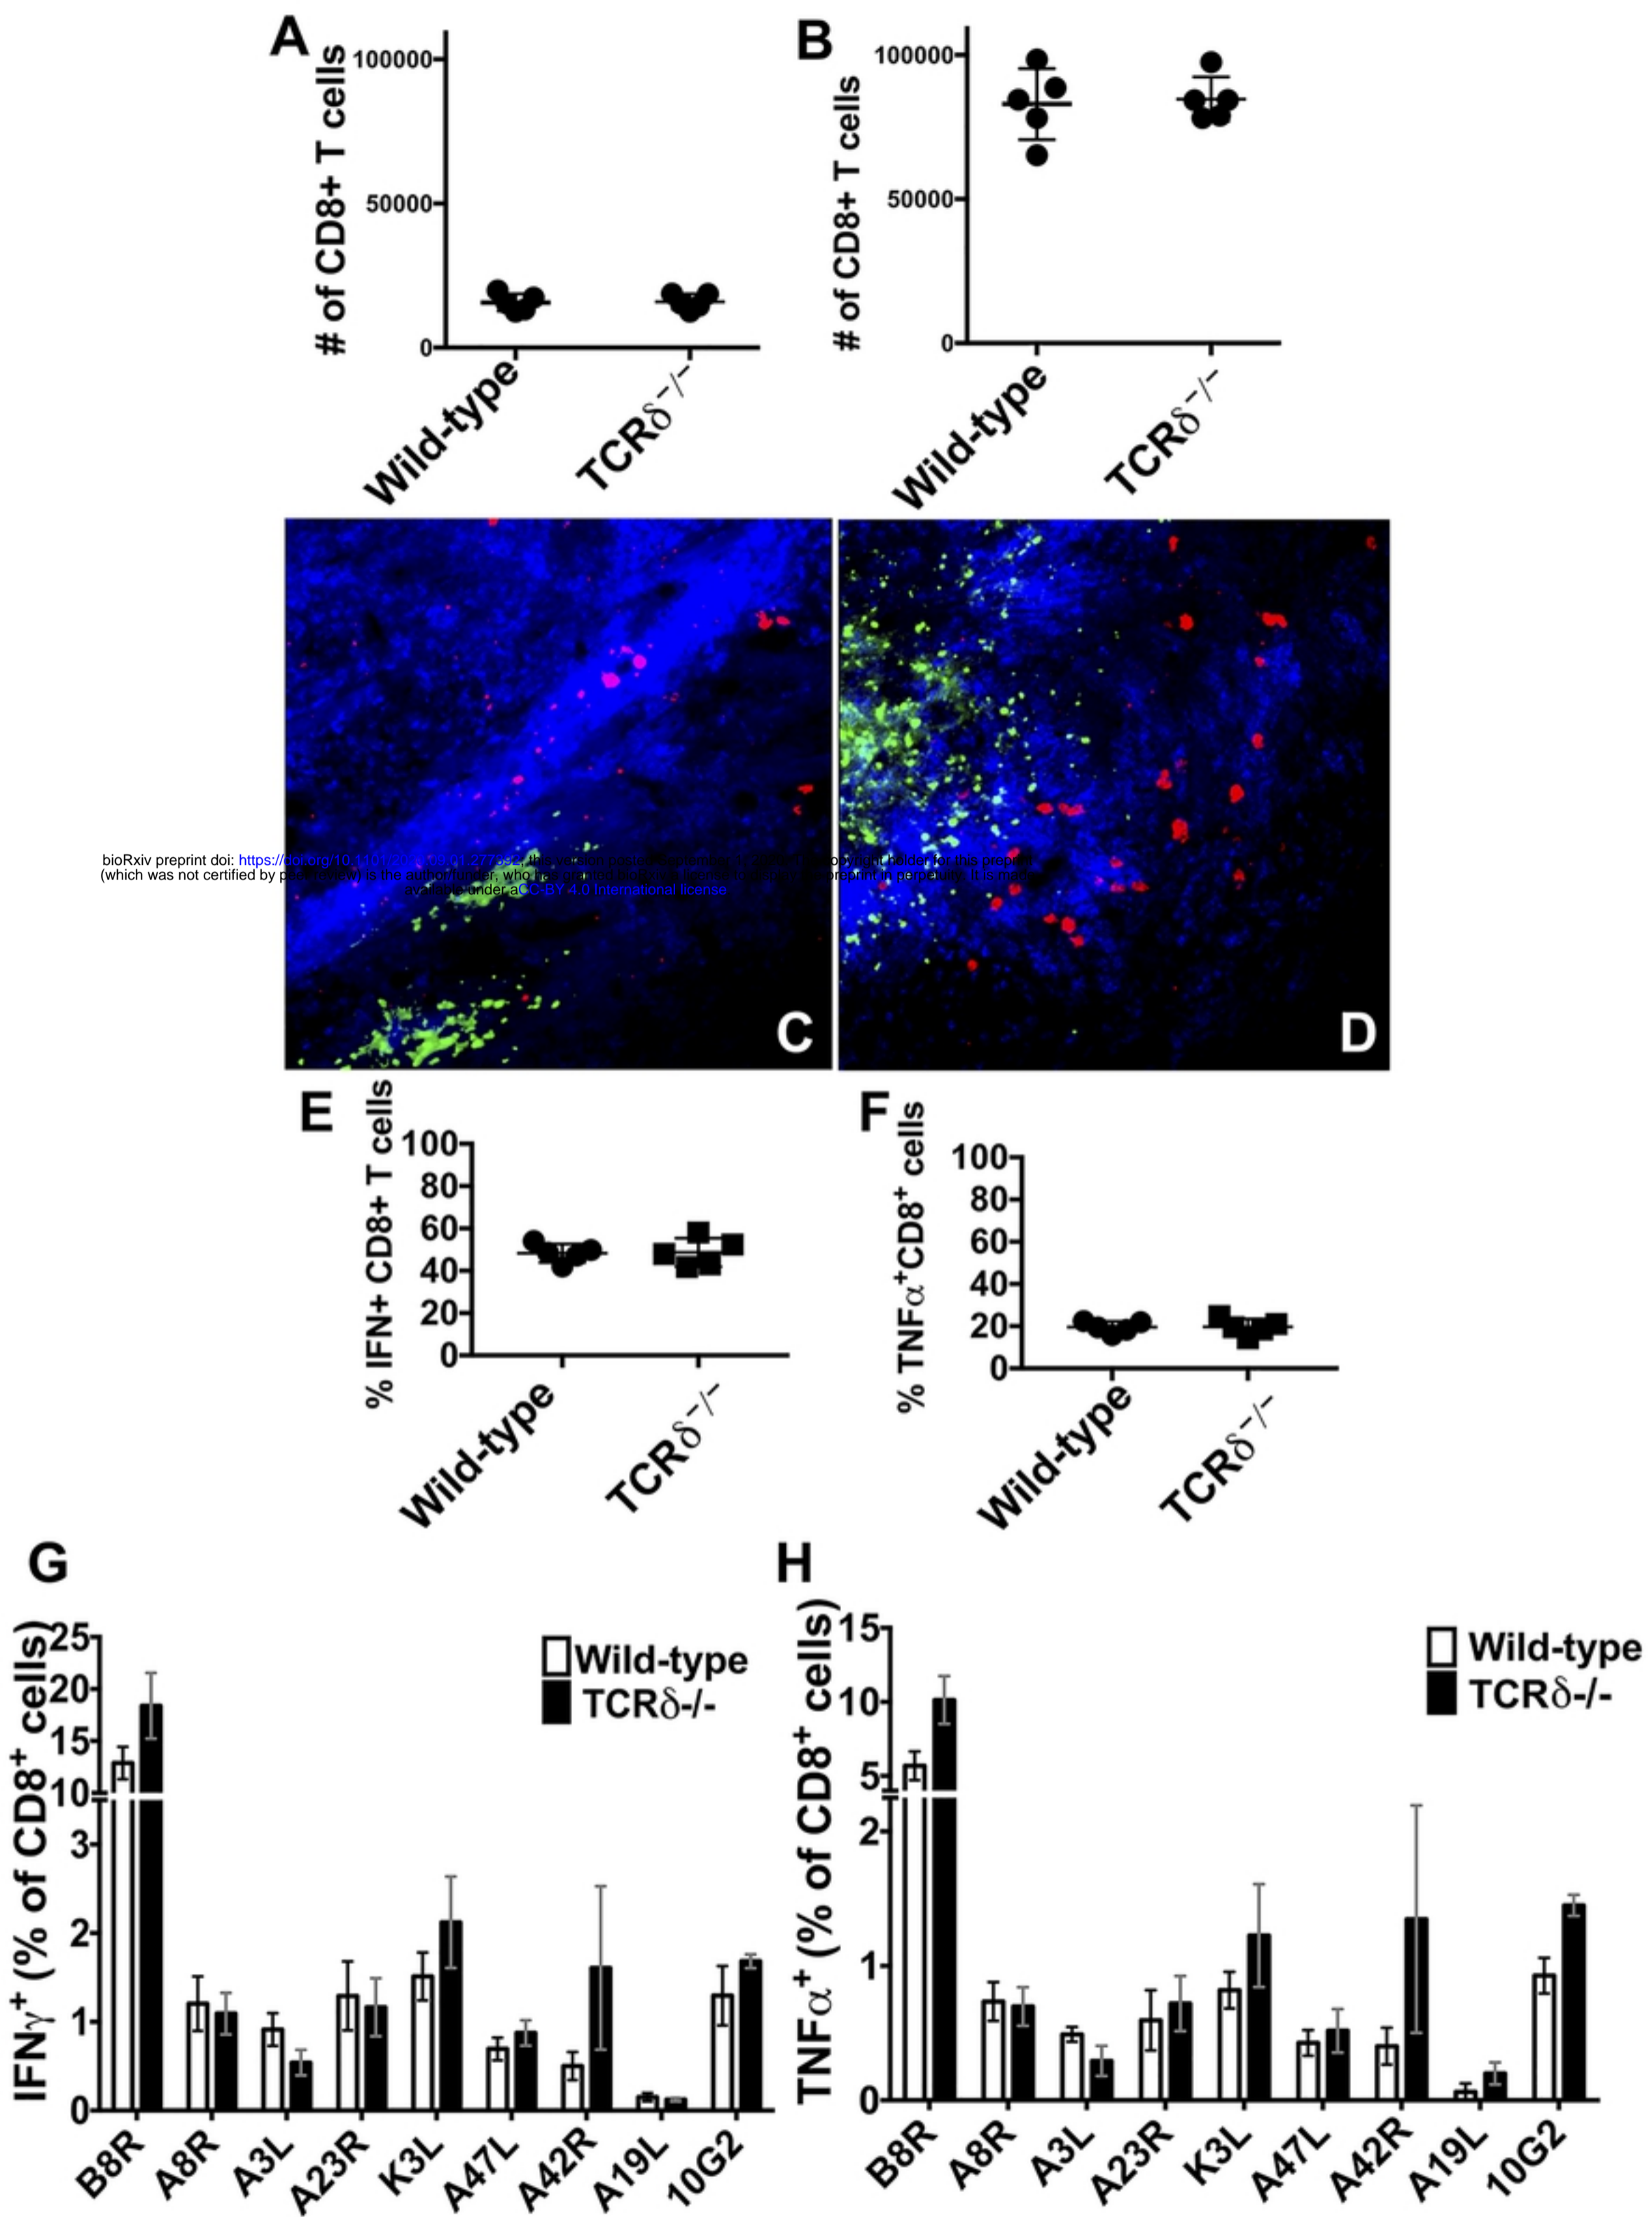

Figure 3

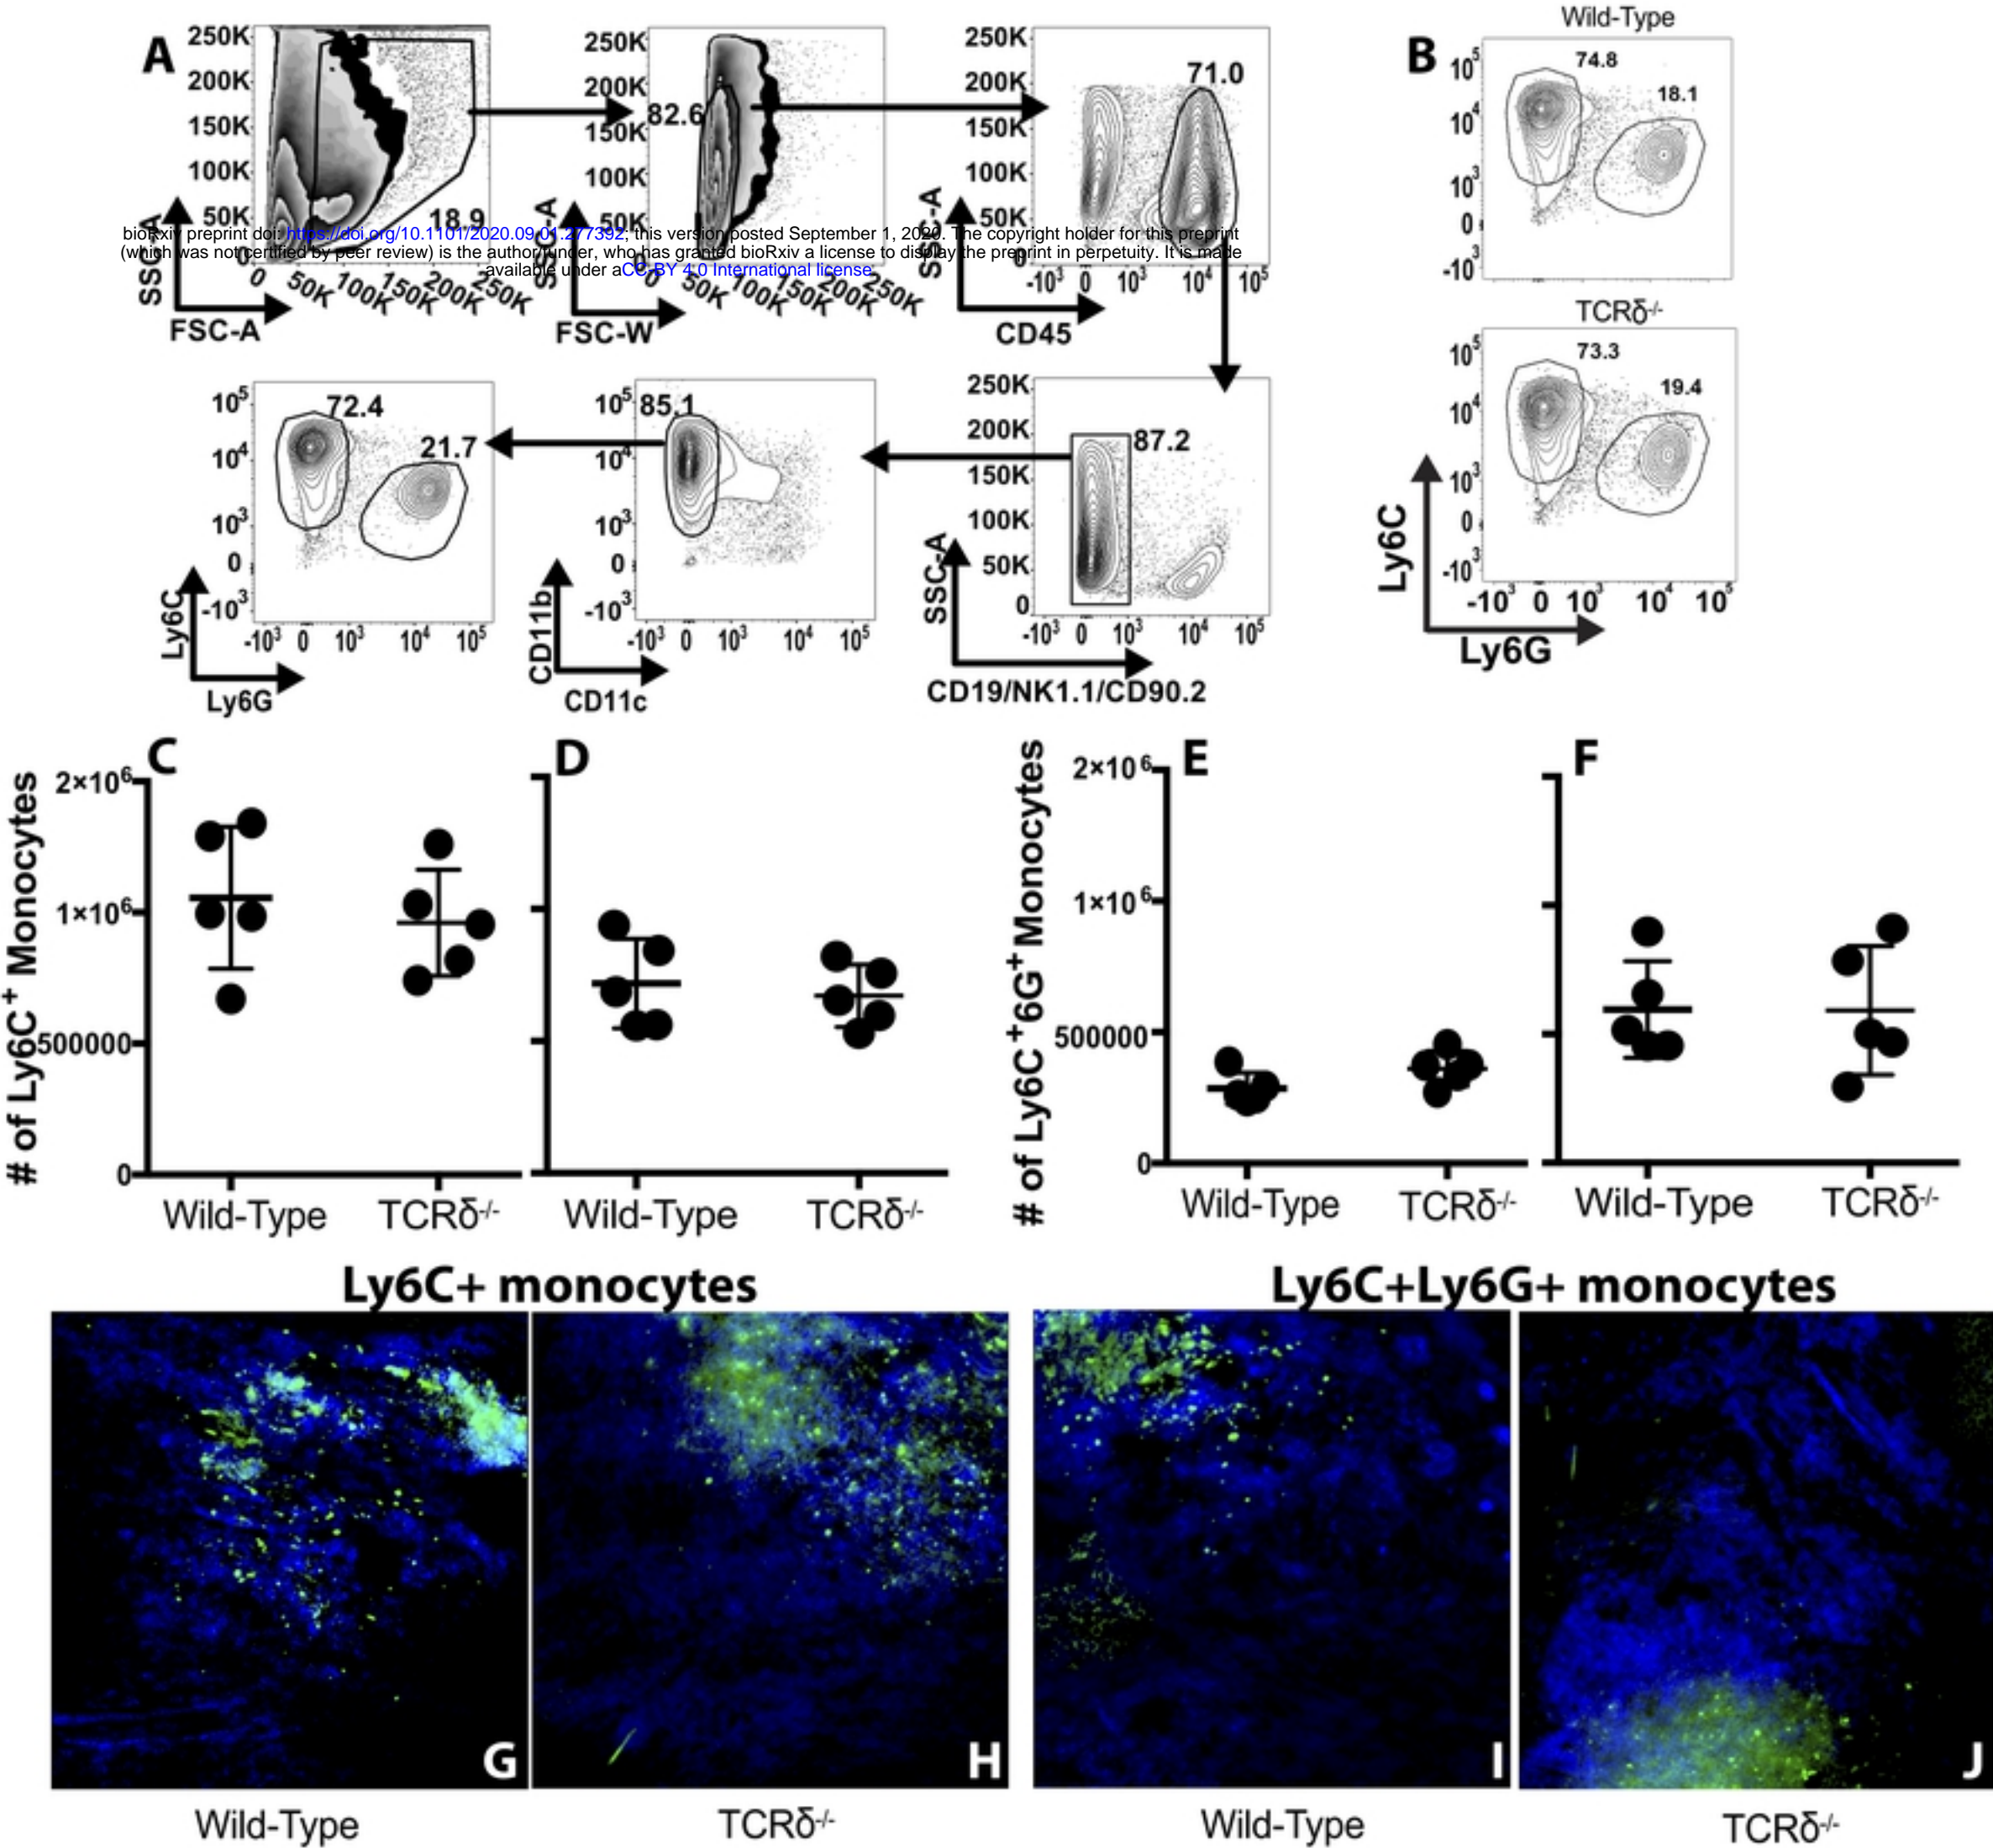

Figure 4



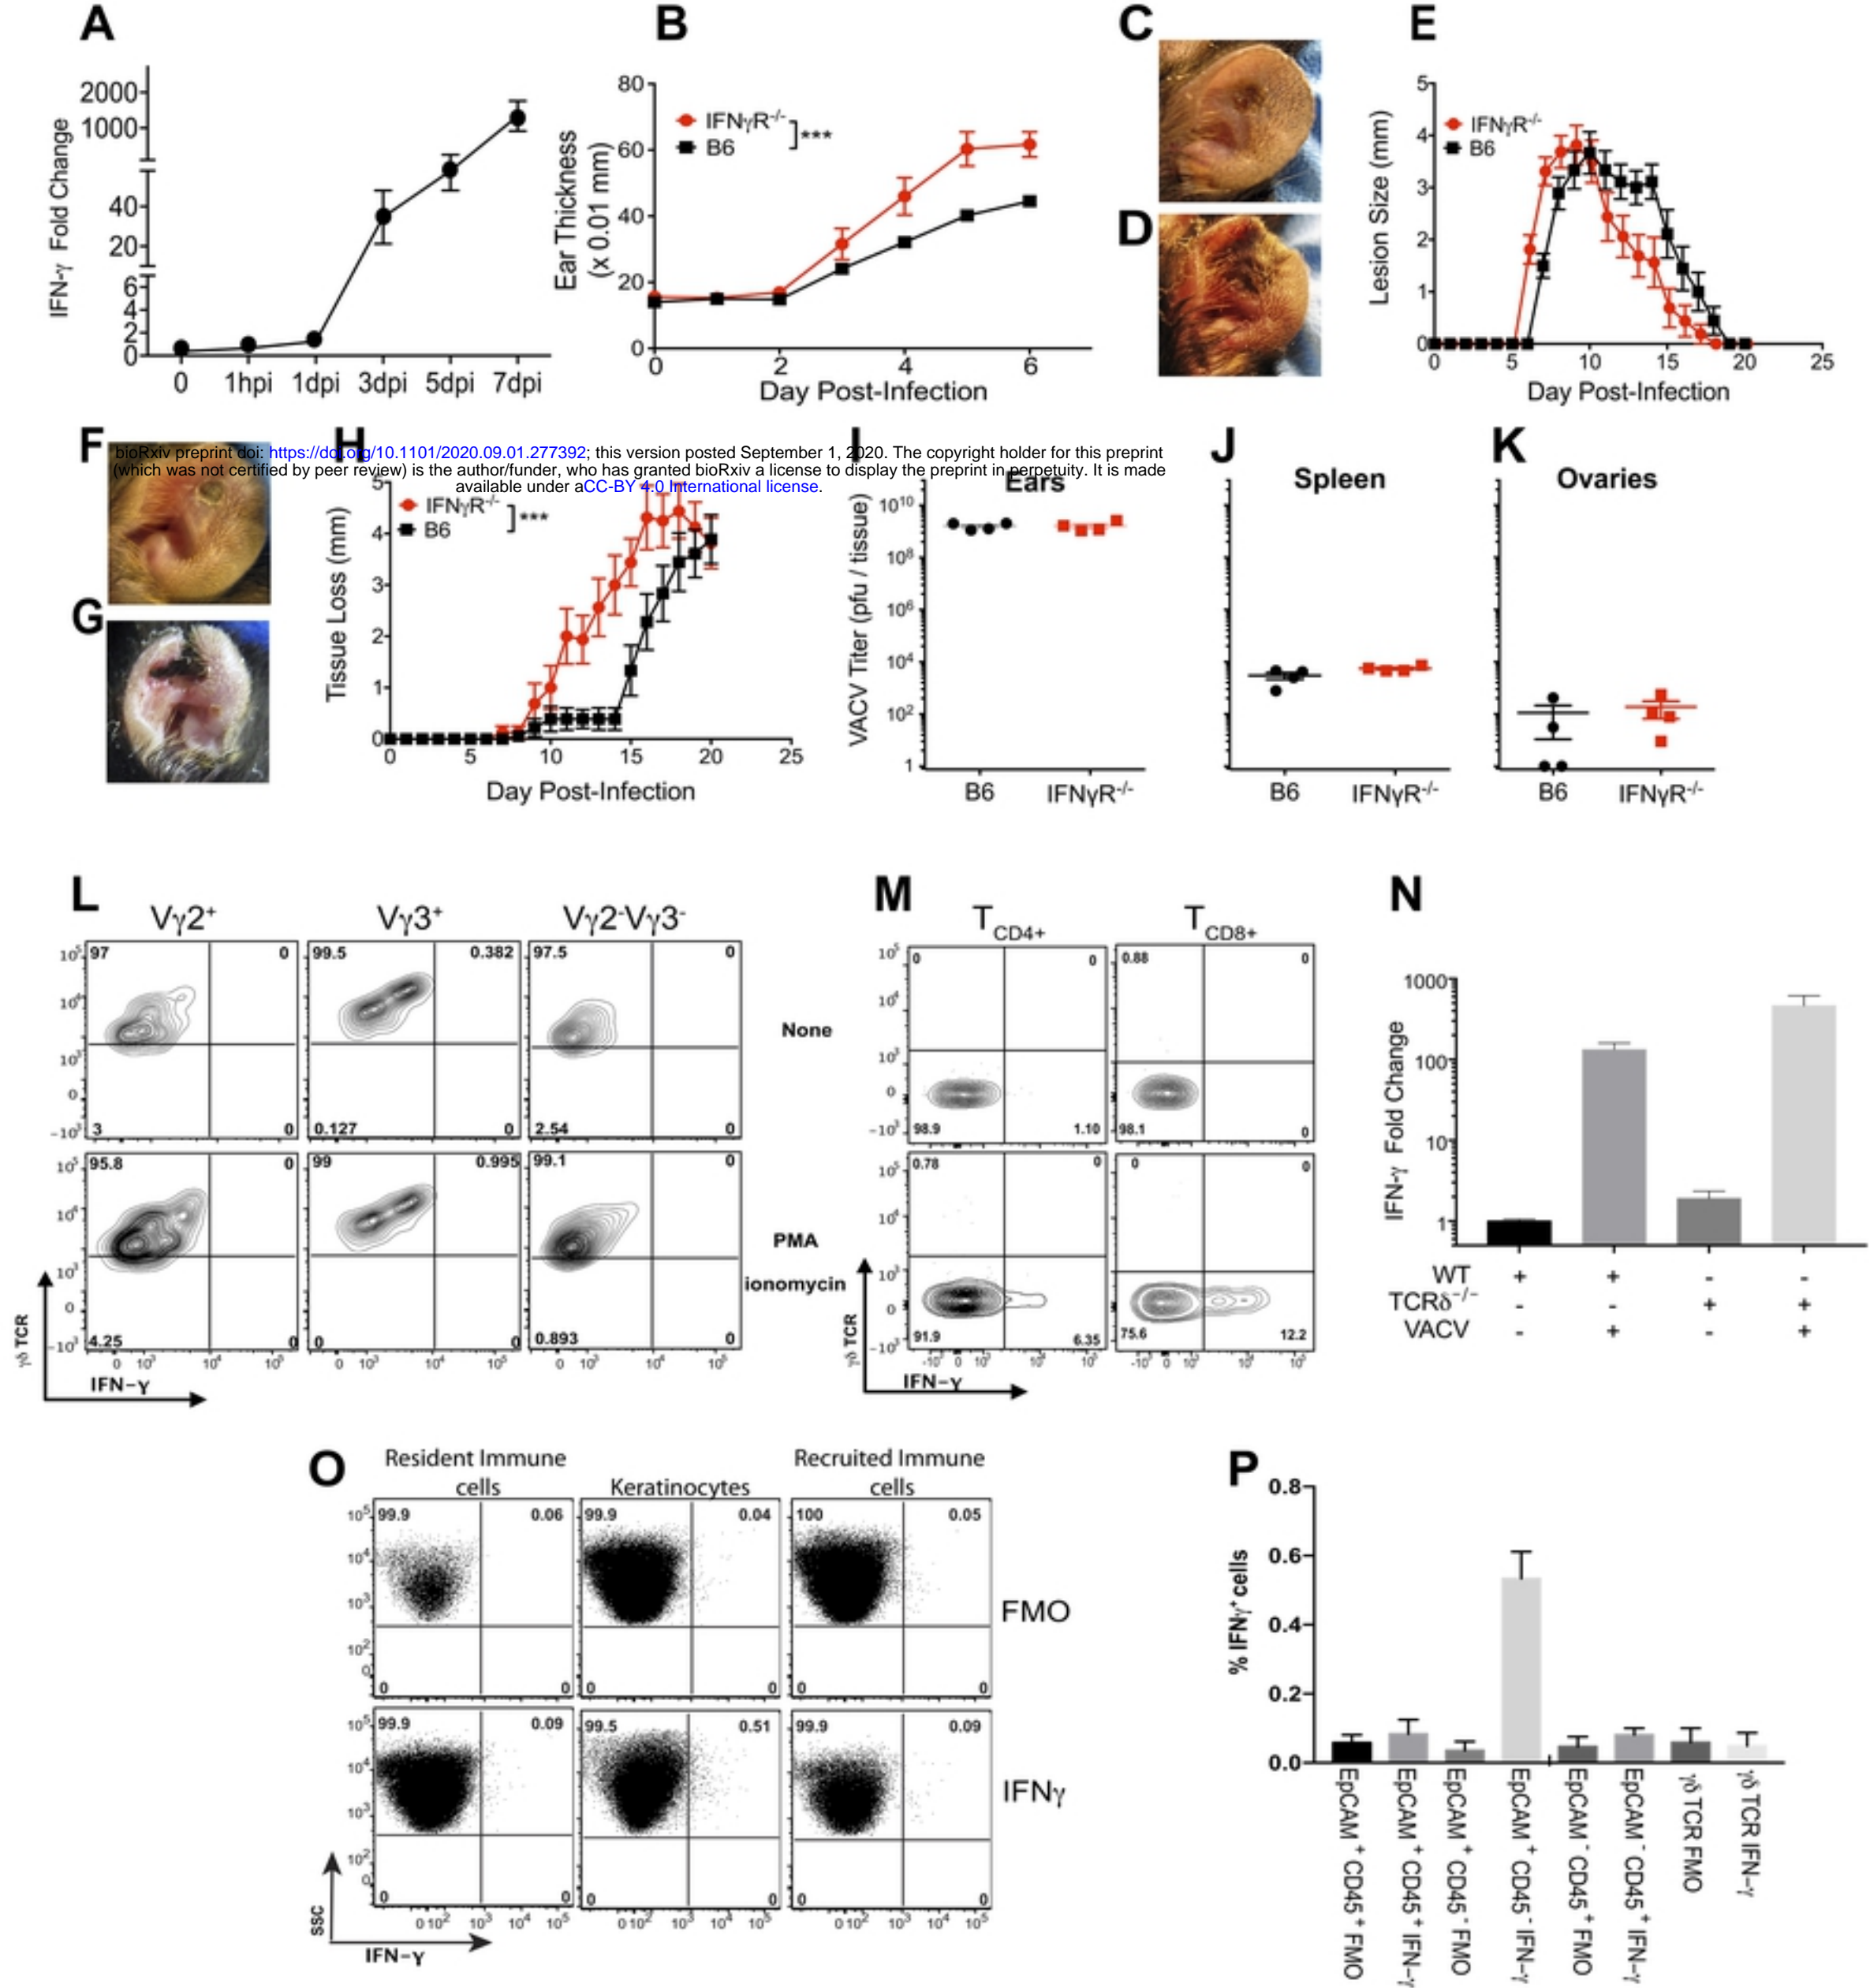

Figure 5

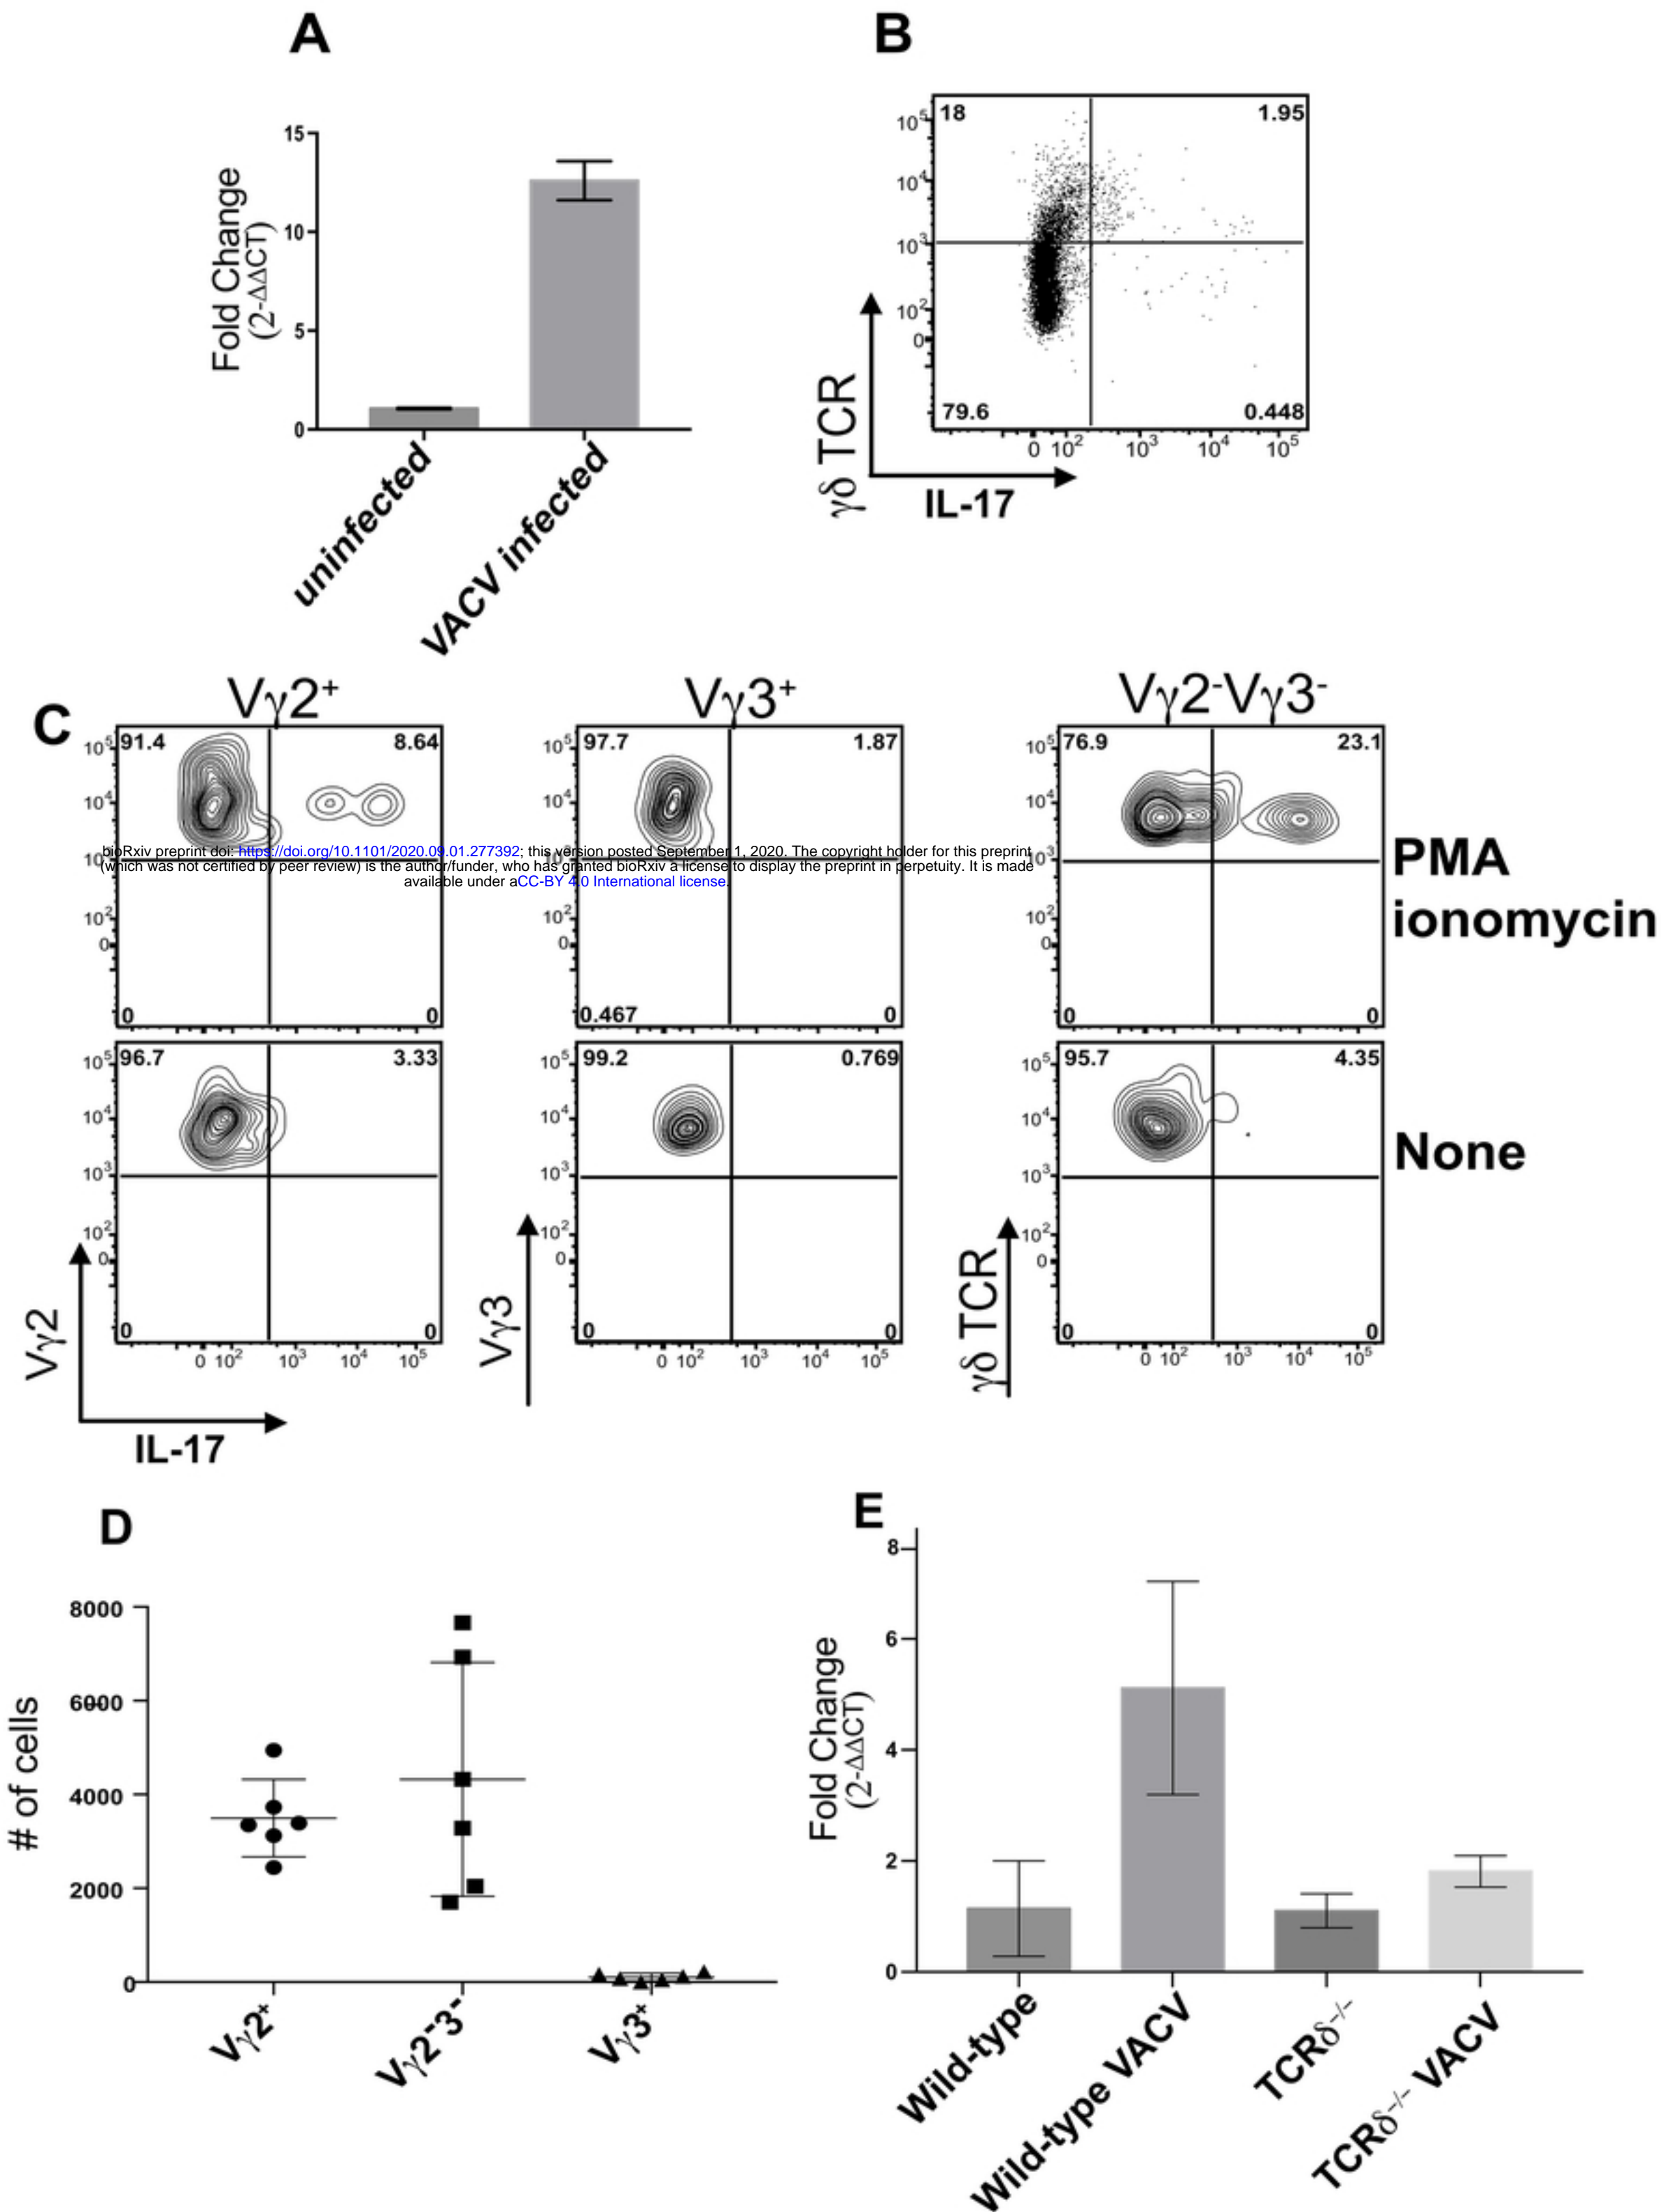

Figure 6

**A**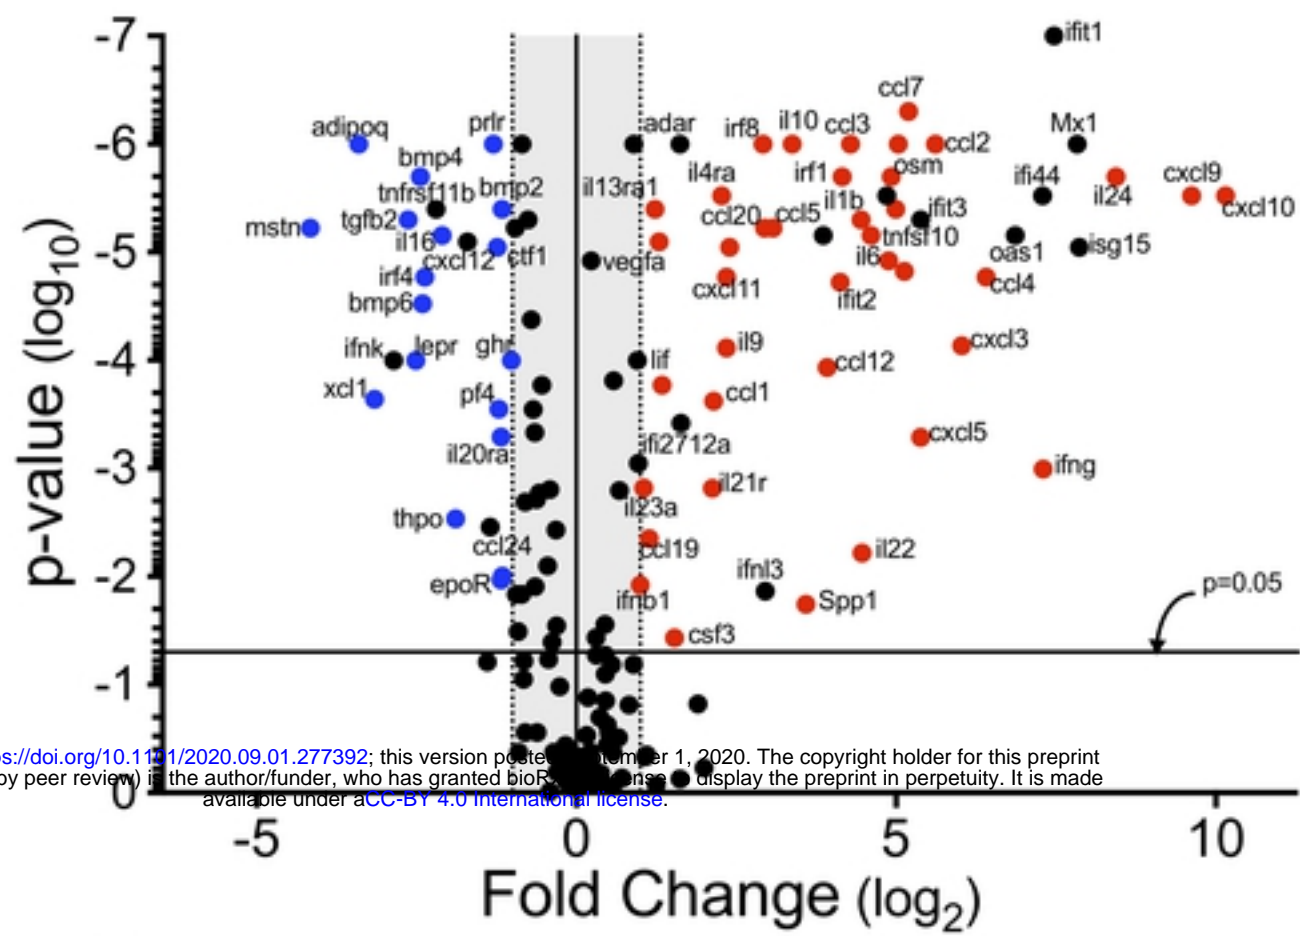

bioRxiv preprint doi: <https://doi.org/10.1101/2020.09.01.277392>; this version posted September 1, 2020. The copyright holder for this preprint (which was not certified by peer review) is the author/funder, who has granted bioRxiv a license to display the preprint in perpetuity. It is made available under aCC-BY 4.0 International license.

**B CC Chemokines**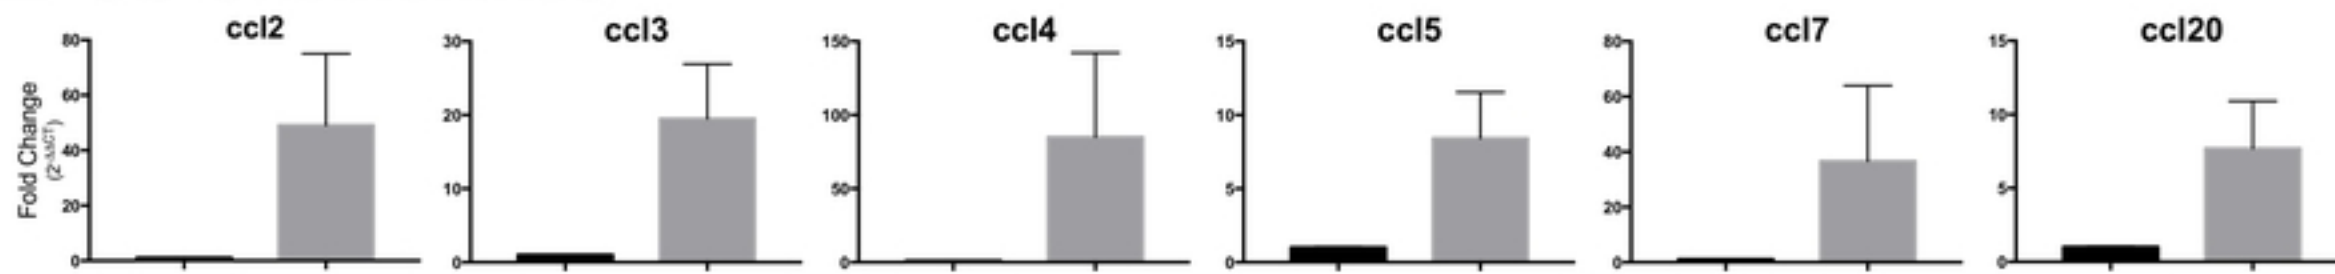**C IL-10 superfamily members**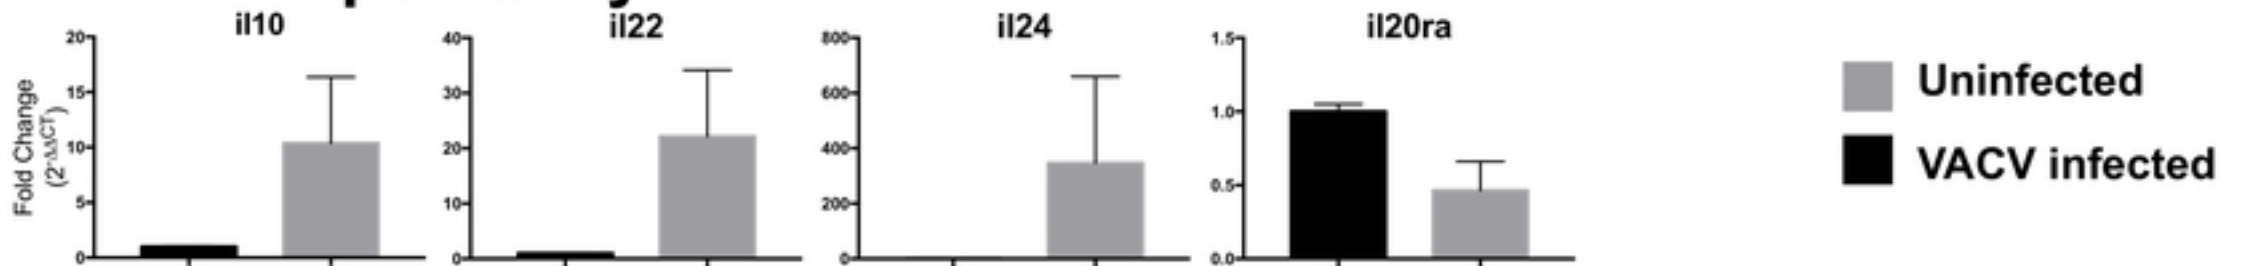**D Cytokines**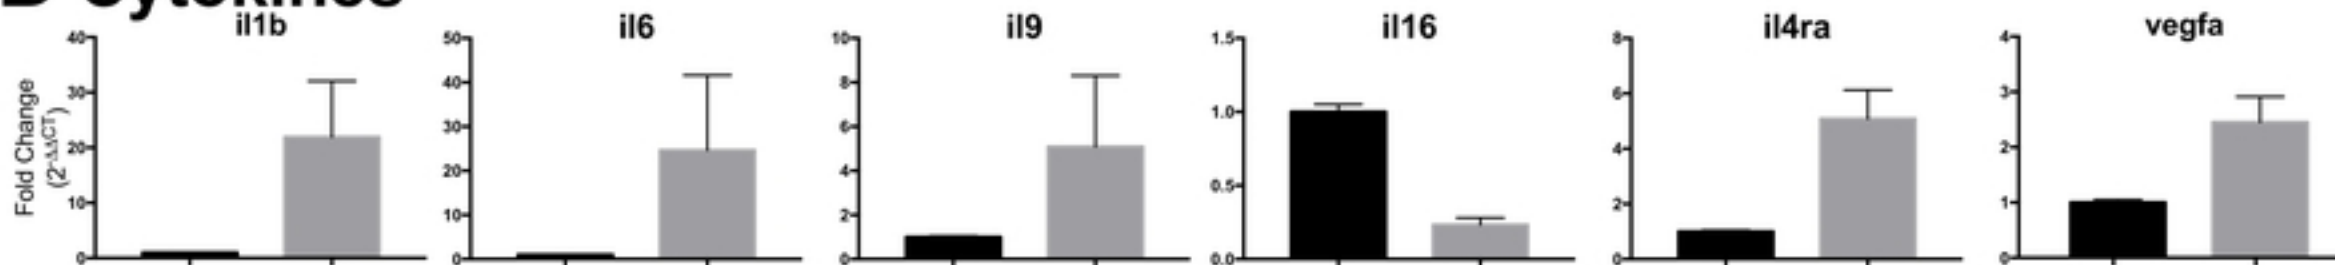**E Hormones/Growth factors**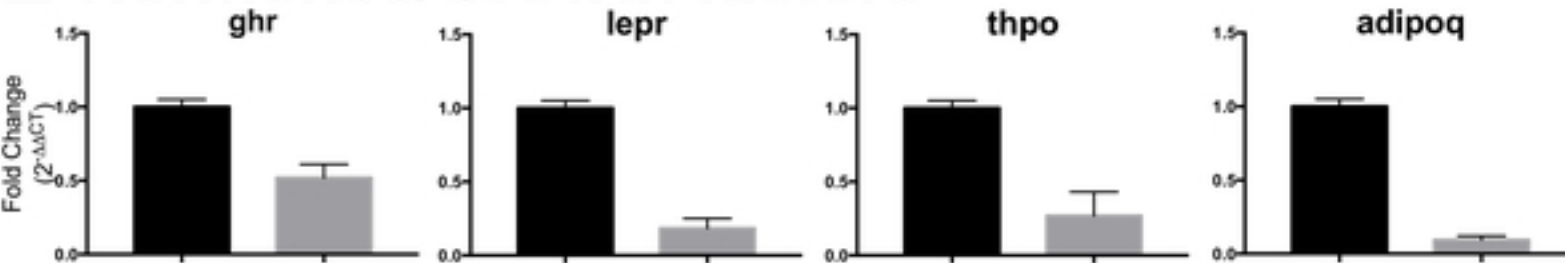**F TGF-β superfamily members**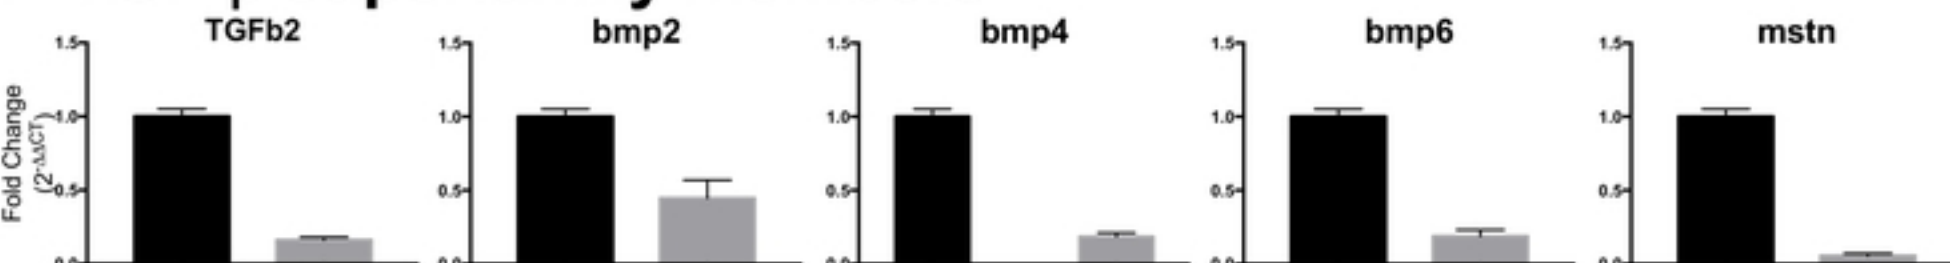

Figure 7
